# Supplementary material for: Biomass-derived magnetic amorphous carbon as an efficient catalyst in the conversion of fructose into 5-hydroxymethylfurfural
Source: Royal Society of Chemistry journal article supplement (doi:10.1039/d4dt03566f), 2025-01-01

## **Biomass-derived magnetic amorphous carbon as an efficient catalyst in the conversion of fructose into 5-hydroxymethylfurfural**

Tuan Minh Dang,<sup>a,b, ‡</sup> Trinh Hao Nguyen,<sup>a,b, ‡</sup> Ha Khanh Nguyen,<sup>a,b</sup> Ha Bich Phan,<sup>a,b,c</sup> Hai  
Truong Nguyen,<sup>a,b \*</sup> and Phuong Hoang Tran<sup>a,b \*</sup>

<sup>a</sup>Department of Organic Chemistry, Faculty of Chemistry, University of Science, Ho Chi Minh  
City, Vietnam

<sup>b</sup>Vietnam National University, Ho Chi Minh City, Vietnam

<sup>c</sup>Institute of Public Health, Ho Chi Minh City, Vietnam

<sup>‡</sup> The authors contributed equally to this work.

\*Corresponding author:

Hai Truong Nguyen: phone number: +84-908-108-824; e-mail: [ngthai@hcmus.edu.vn](mailto:ngthai@hcmus.edu.vn)

Phuong Hoang Tran: phone number: +84-903-706-762; e-mail: [thphuong@hcmus.edu.vn](mailto:thphuong@hcmus.edu.vn)

## Section 1: Chemical and equipment

Iron (III) chloride ( $\geq 97\%$ ), sodium hydroxide ( $\geq 99\%$ ), hydrochloric acid (36%), oxalic acid ( $\geq 99\%$ ), *D*-glucose monohydrate ( $\geq 99\%$ ), dioxane ( $\geq 99\%$ ), methyl isobutyl ketone (MIBK) ( $\geq 99\%$ ), *D*-fructose ( $\geq 99\%$ ), dimethylformamide ( $\geq 99\%$ ) were obtained from Merck. 2,5-Diformylfuran ( $>99\%$ ), 2,5-furandicarboxylic acid ( $>99\%$ ), 5-(hydroxymethyl)furfural ( $>99\%$ ) furfural ( $>99\%$ ), levulinic acid ( $>99\%$ ), deuteriochloroform ( $>99\%$ ), dimethyl sulfoxide ( $>99\%$ ) were supplied by Sigma–Aldrich. All chemicals were utilized without any additional purification.

### Analytical techniques

The NMR spectra were obtained using a Bruker Advance 500 MHz nuclear magnetic resonance (NMR) spectrometer, with *D*-chloroform serving as the solvent. A thorough examination was carried out using Fourier transform-infrared spectroscopy (FTIR) on KBr pellets utilizing a Bruker Vertex 70 system. The reaction products were measured using a high-performance liquid chromatography system with a diode array detector at a specific wavelength. A particular type of column, called InertSustain C18, was used in the experiment to efficiently separate the different components in the reaction mixture. The temperature of the column was kept at 30 °C. A solution of methanol and sulfuric acid was utilized as the eluent, flowing at a rate of 0.7 mL.min<sup>-1</sup>.

$$\text{H\%} = (\text{The number of 5-HMF moles})/(\text{The initial number of fructose moles}) \times 100\% \quad (1)$$

## Section 2: NMR spectrum of 5-HMF

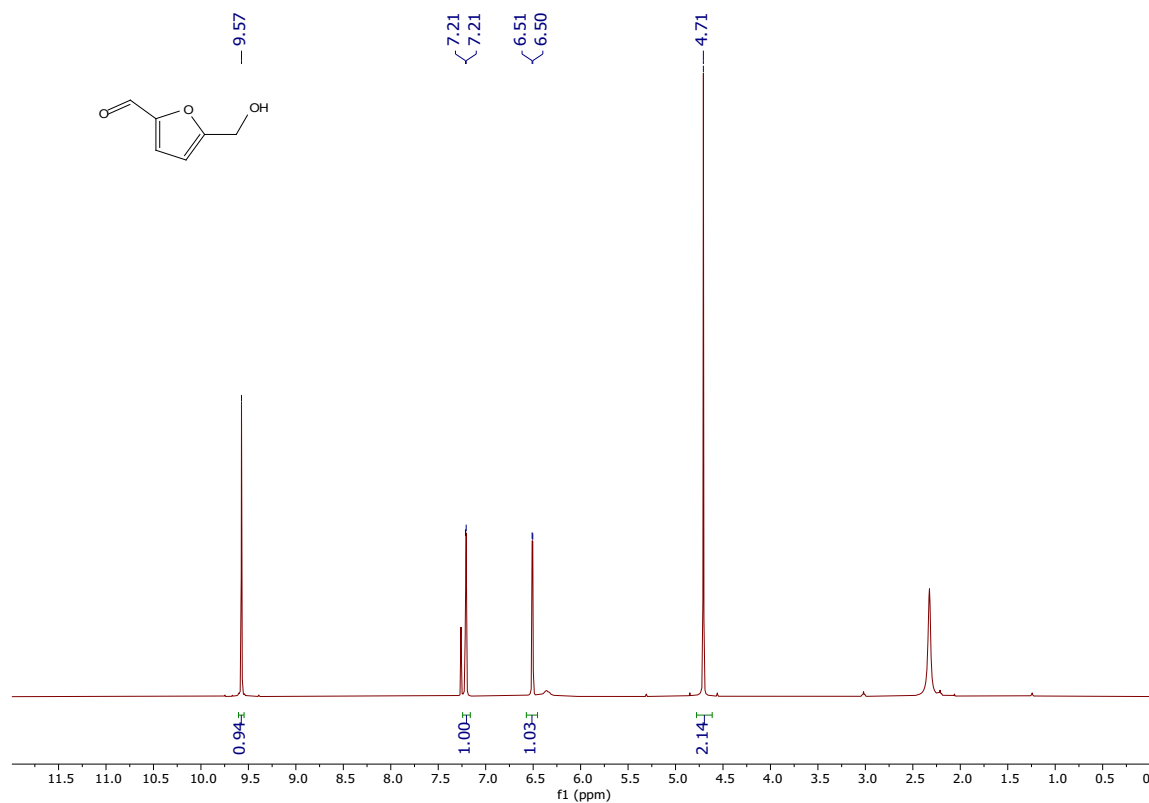

Figure S2-1. <sup>1</sup>H-NMR spectrum of HMF

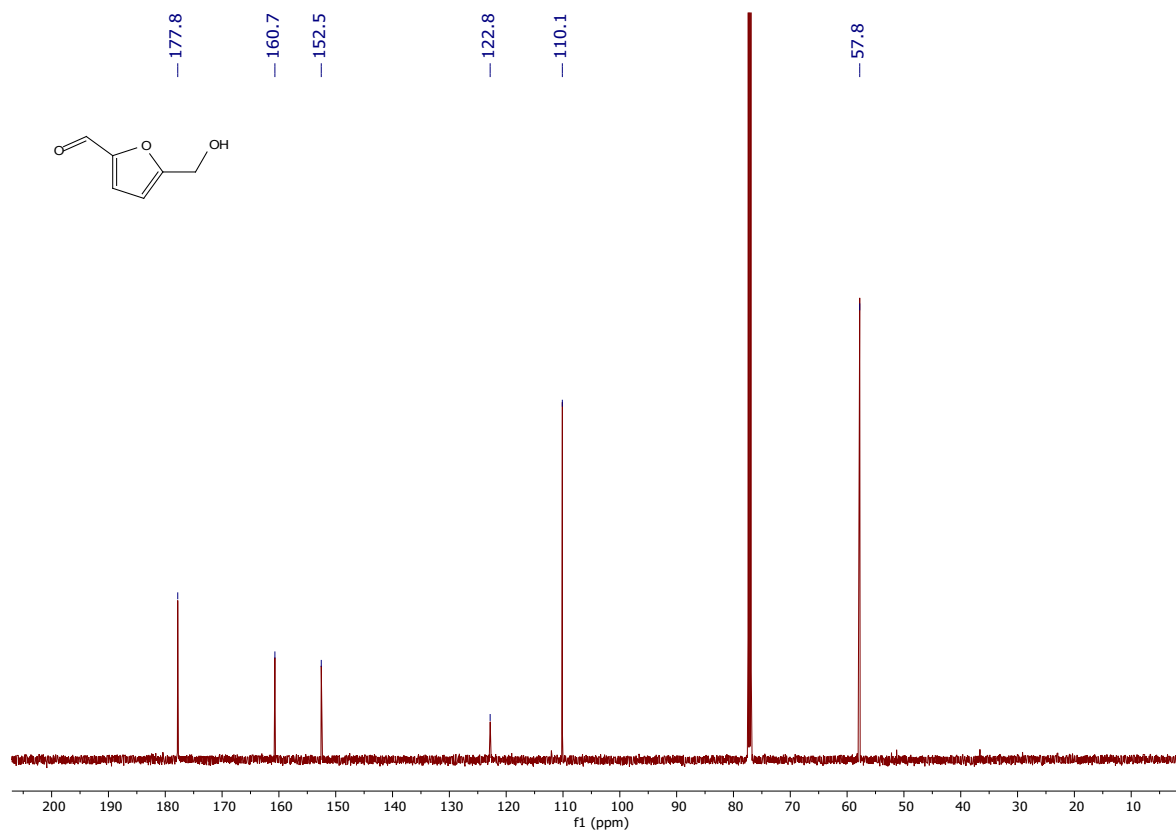

Figure S2-2. <sup>13</sup>C-NMR spectrum of HMF

**Section 3: Titration of catalyst**

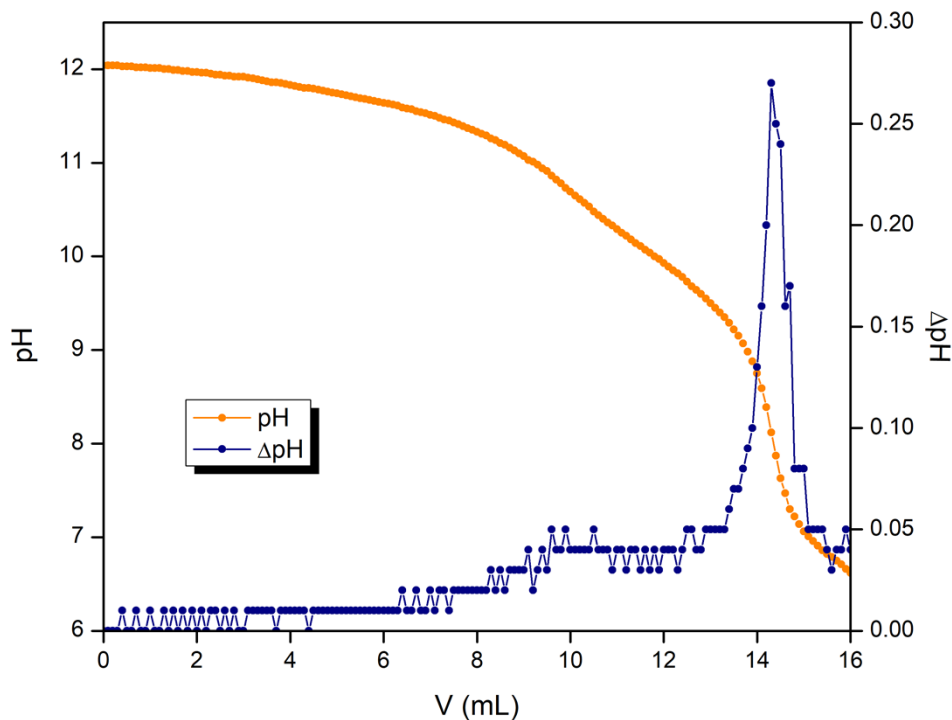

**Figure S3-1.** The titration curves of 100-4 with pH/V (orange line) and  $\Delta$ pH/V (blue line)

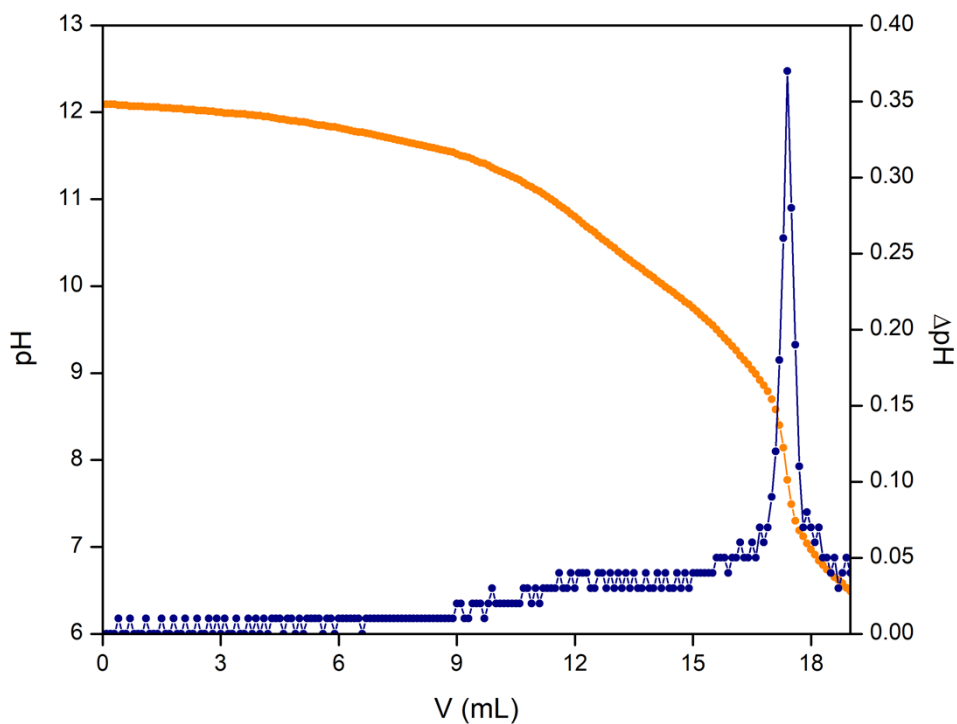

**Figure S3-2.** The titration curves of 200-4 with pH/V (orange line) and  $\Delta$ pH/V (blue line)

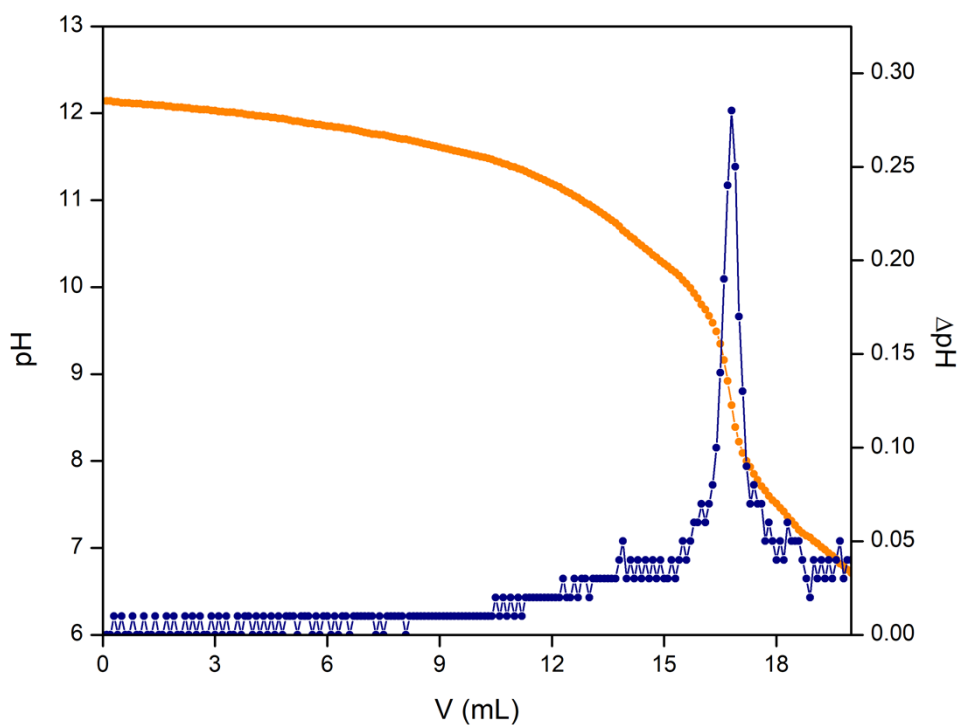

**Figure S3-3.** The titration curves of 300-4 with pH/V (orange line) and  $\Delta\text{pH}/V$  (blue line)

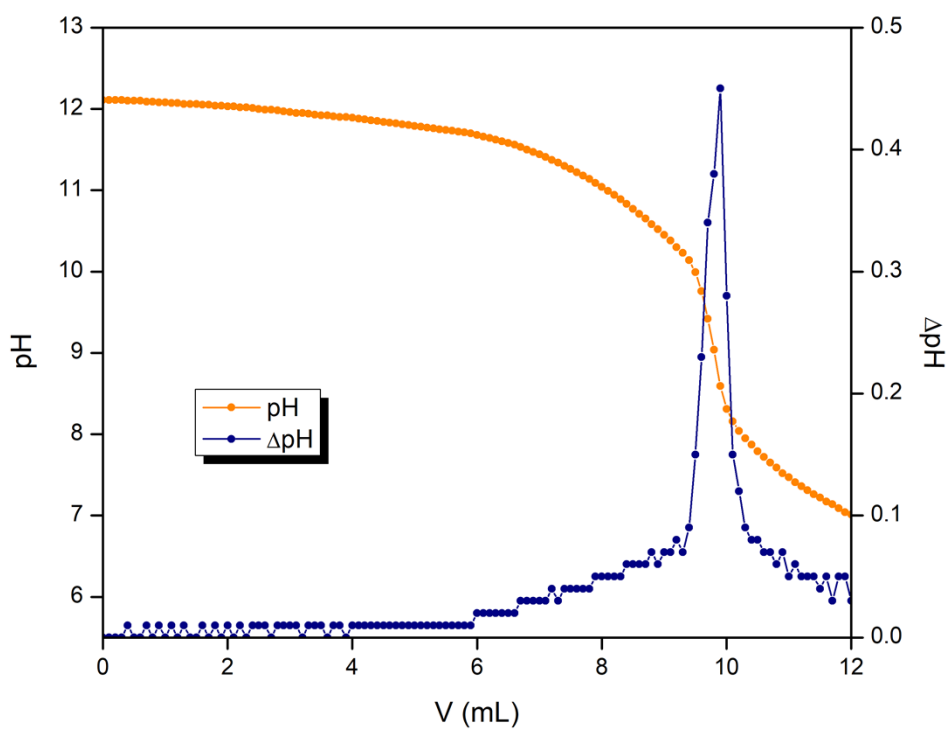

**Figure S3-4.** The titration curves of 350-4 with pH/V (orange line) and  $\Delta\text{pH}/V$  (blue line)

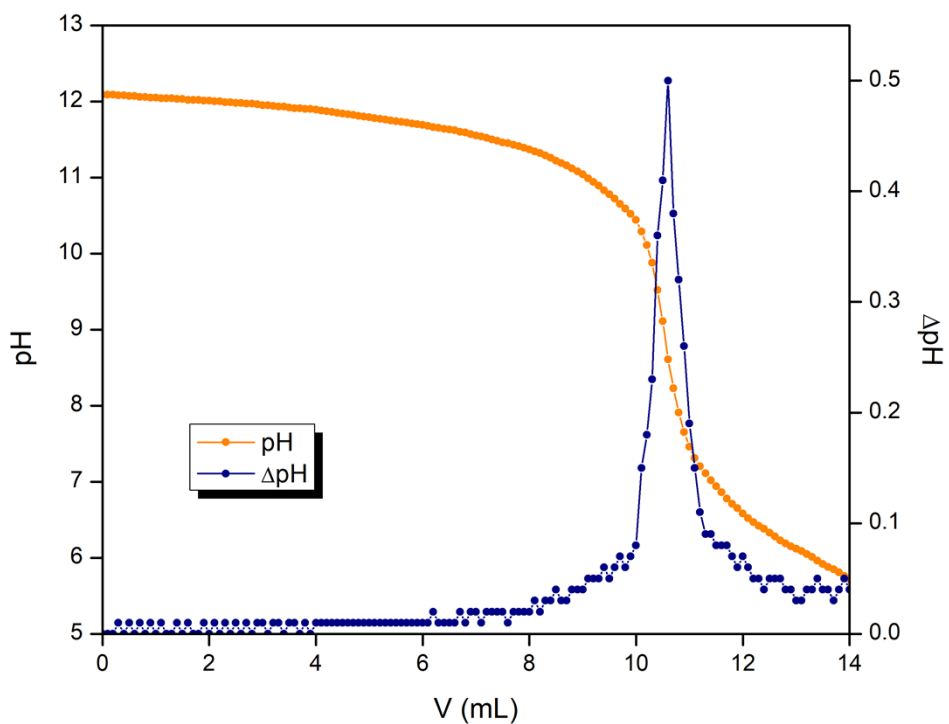

**Figure S3-5.** The titration curves of 400-4 with pH/V (orange line) and  $\Delta\text{pH}/V$  (blue line)

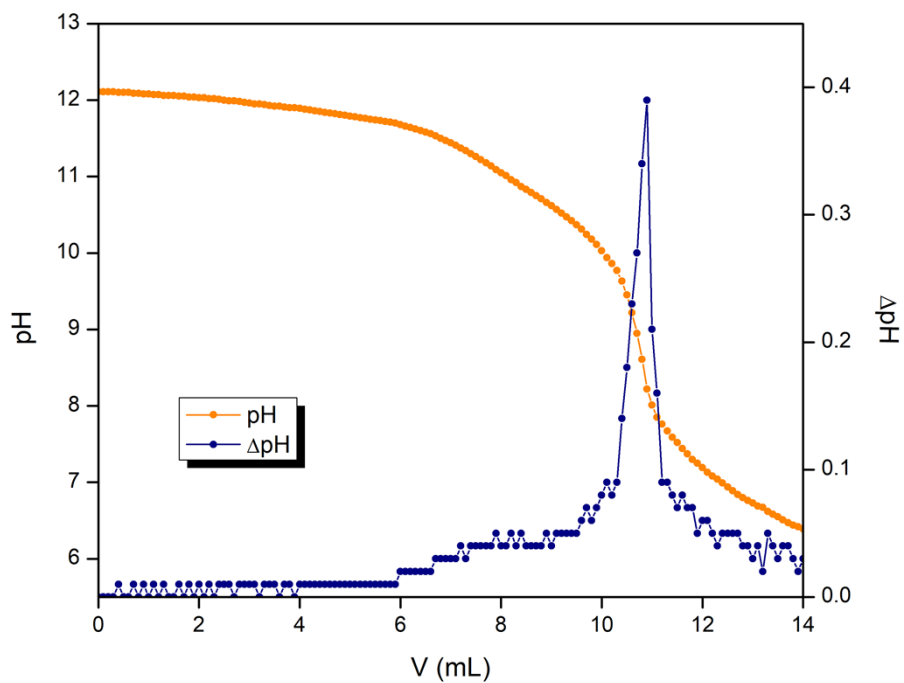

**Figure S3-6.** The titration curves of 400-4R4 with pH/V (orange line) and  $\Delta\text{pH}/V$  (blue line)

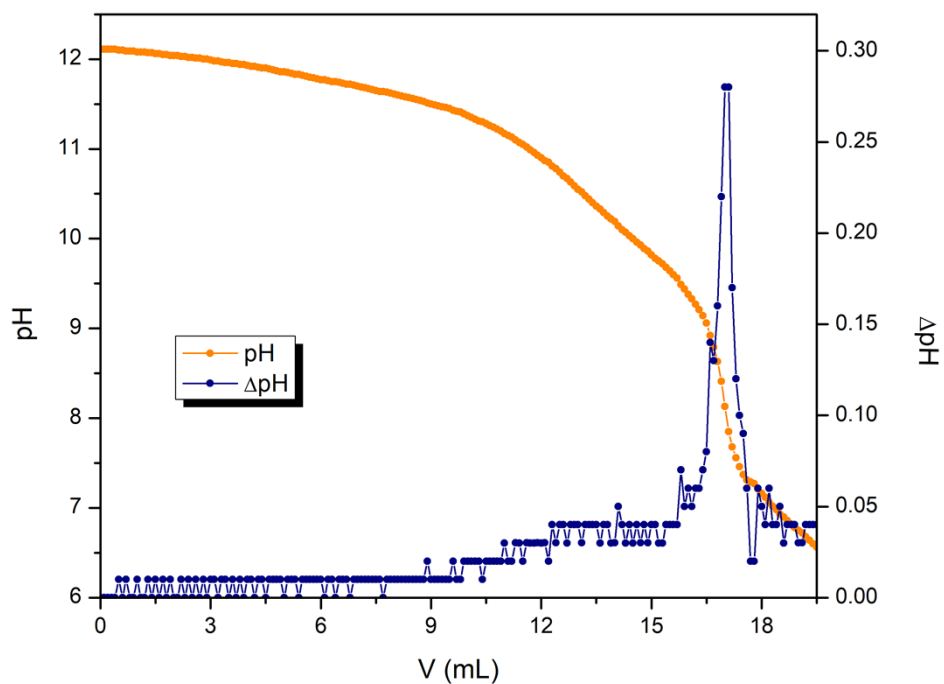

**Figure S3-7.** The titration curves of 500-1 with pH/V (orange line) and  $\Delta\text{pH}/V$  (blue line)

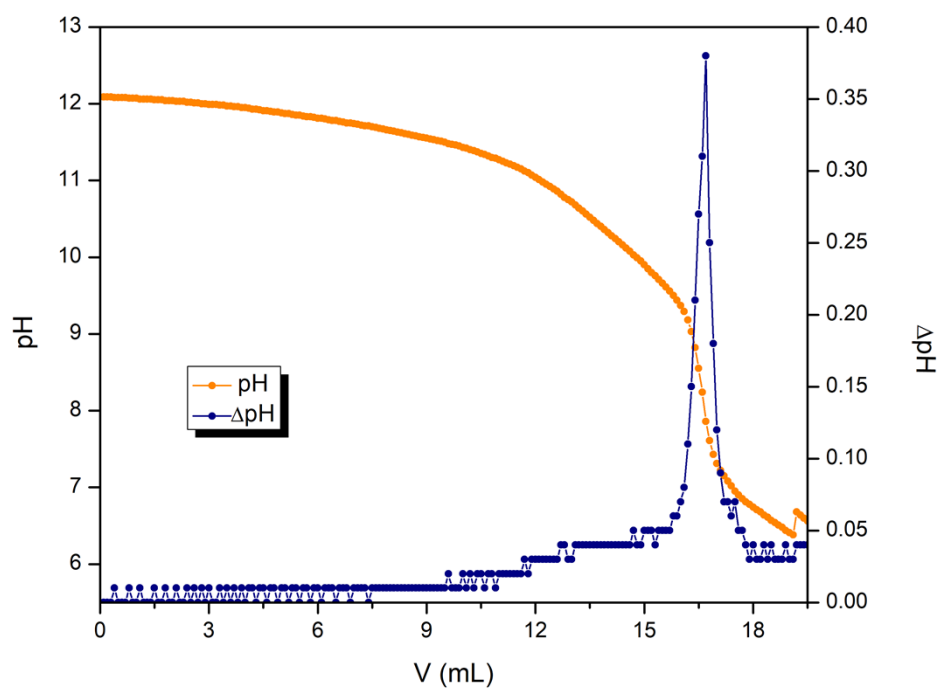

**Figure S3-8.** The titration curves of 500-2 with pH/V (orange line) and  $\Delta\text{pH}/V$  (blue line)

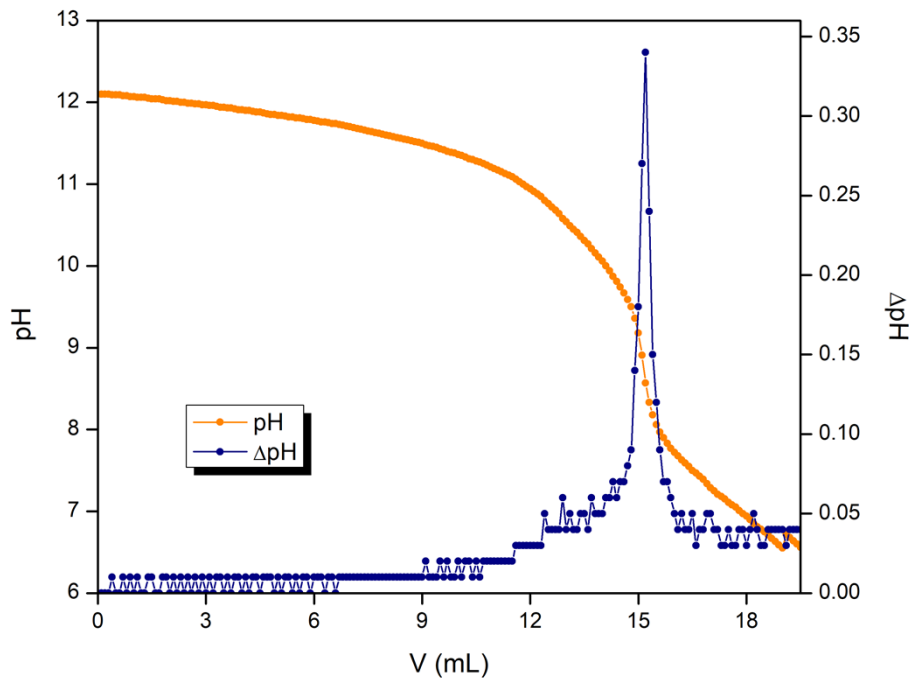

**Figure S3-9.** The titration curves of 500-3 with pH/V (orange line) and  $\Delta$ pH/V (blue line)

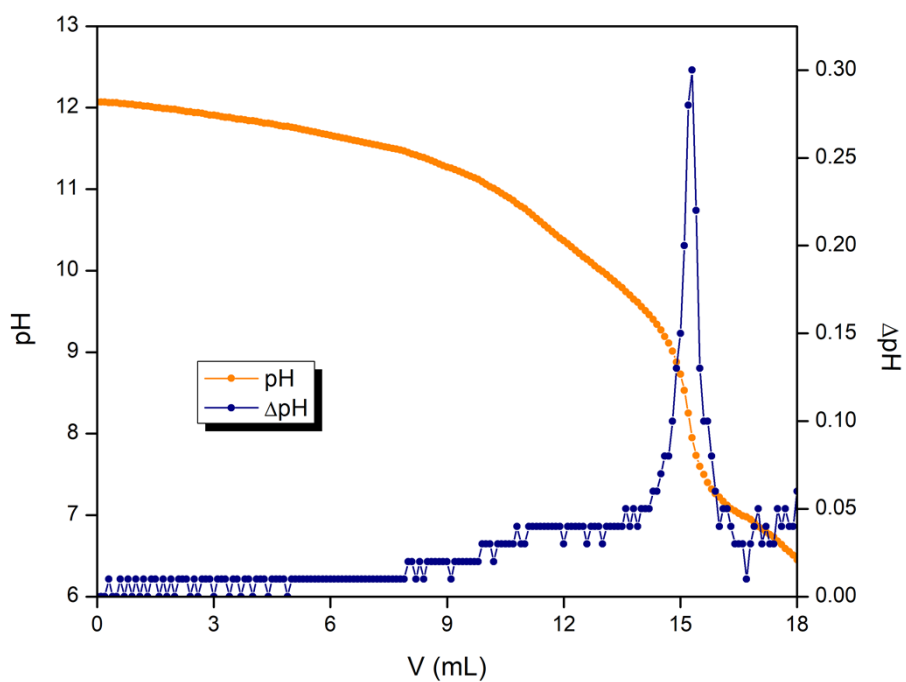

**Figure S3-10.** The titration curves of 500-4 with pH/V (orange line) and  $\Delta$ pH/V (blue line)



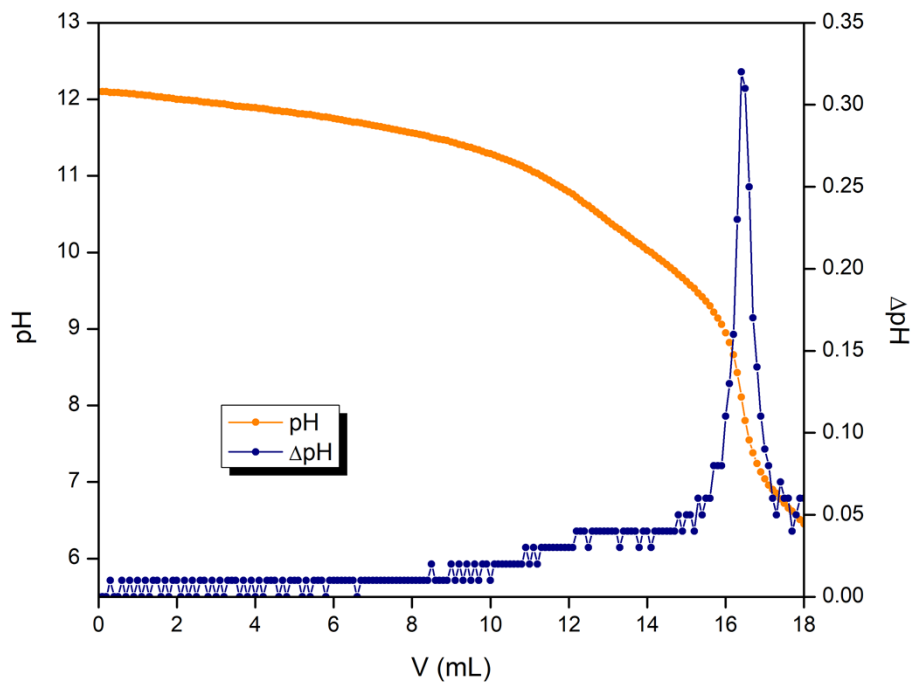

**Figure S3-11.** The titration curves of 500-5 with pH/V (orange line) and  $\Delta$ pH/V (blue line)

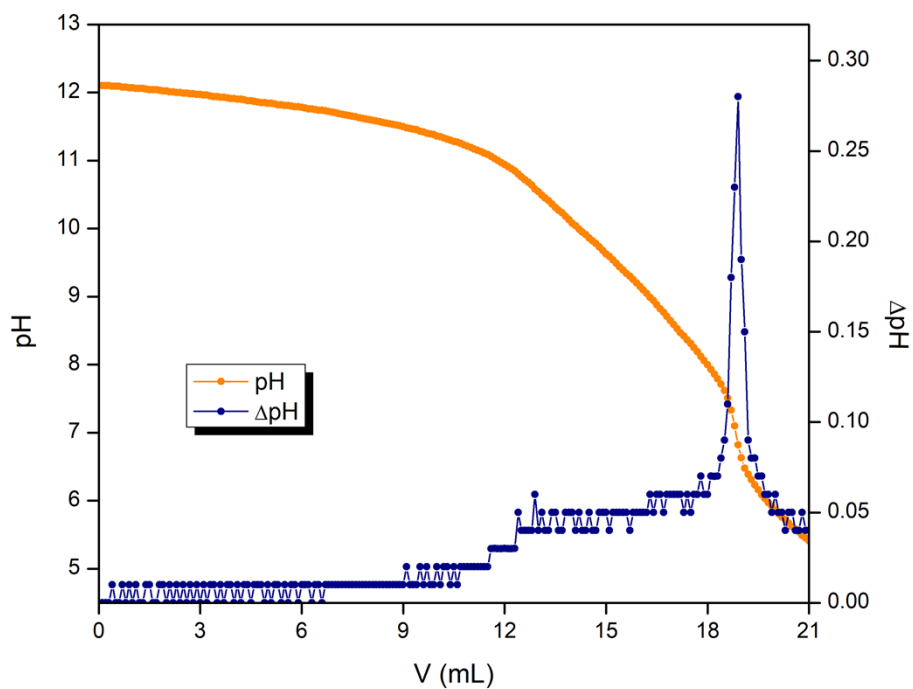

**Figure S3-12.** The titration curves of Blank with pH/V (orange line) and  $\Delta$ pH/V (blue line)

## Section 4: HPLC chromatography

**Figure S4-1:** HPLC chromatography of 5-HMF in investigating catalytic performance. Reaction conditions: Fructose (1mmol), DMSO, for 30 minutes at 120 °C.

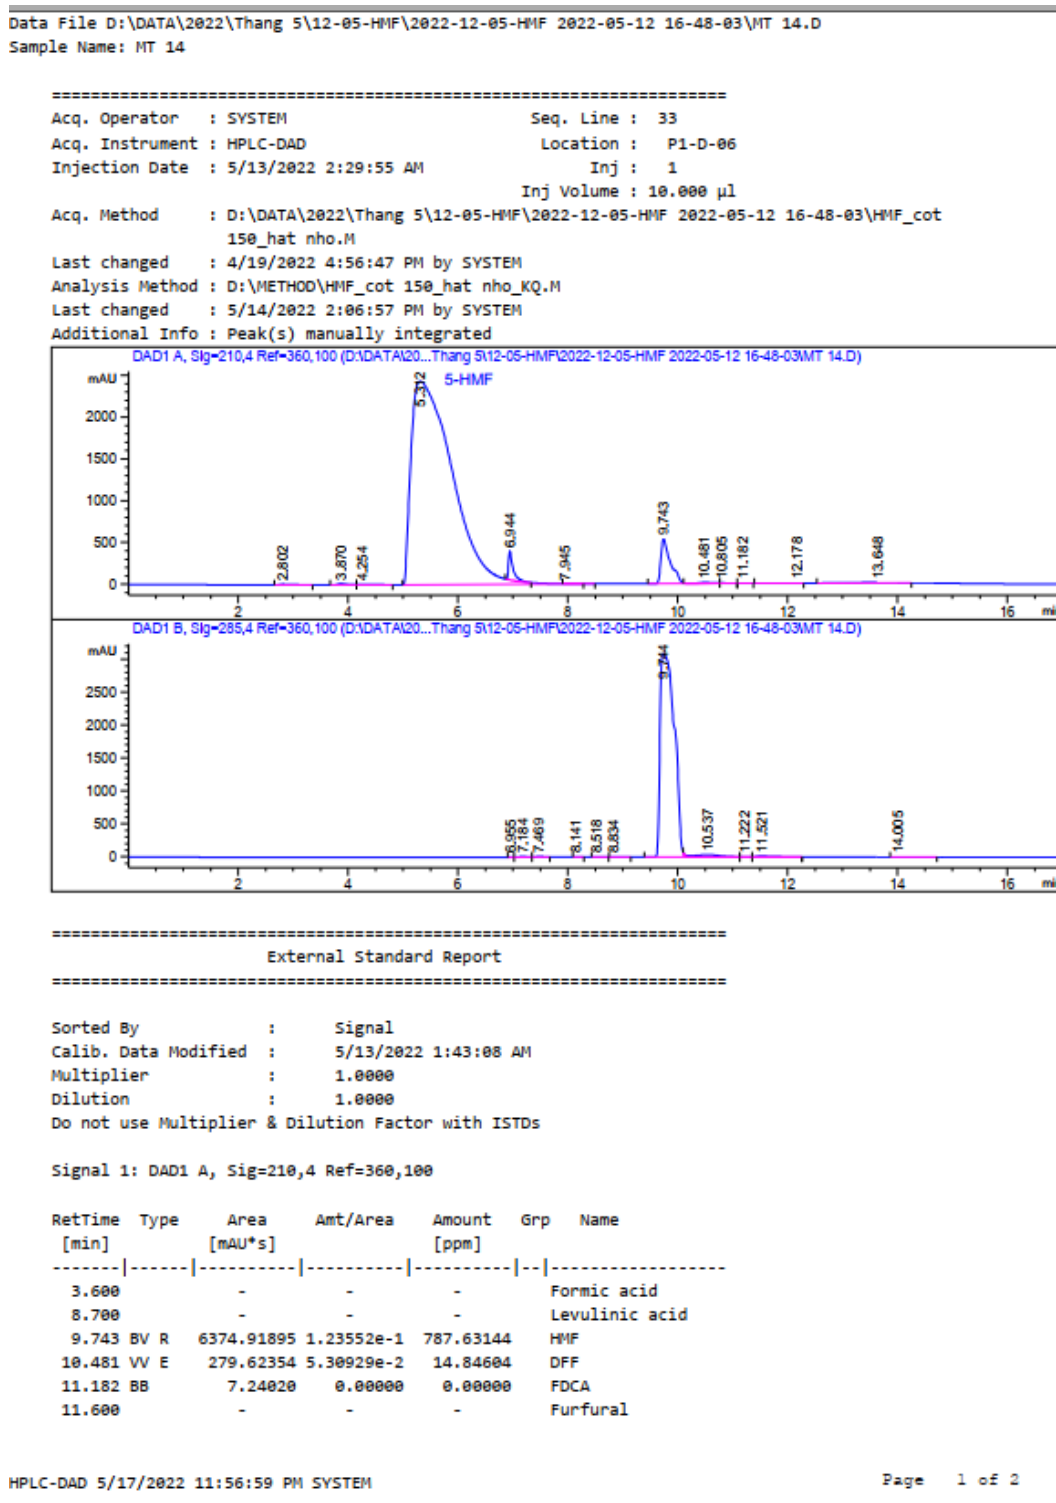



**Figure S4-2:** HPLC chromatography of 5-HMF in investigating catalytic performance. Reaction conditions: Fructose (1mmol), DMSO, for 1 hour at 120 °C.

Data File D:\DATA\2022\Thang 5\12-05-HMF\2022-12-05-HMF 2022-05-12 16-48-03\MT 15.D  
 Sample Name: MT 15

```

=====
Acq. Operator   : SYSTEM                               Seq. Line :   34
Acq. Instrument : HPLC-DAD                             Location  : P1-D-07
Injection Date  : 5/13/2022 2:48:02 AM                 Inj       :    1
                                                    Inj Volume: 10.000 µl
Acq. Method     : D:\DATA\2022\Thang 5\12-05-HMF\2022-12-05-HMF 2022-05-12 16-48-03\HMF_cot
                  150_hat_nho.M
Last changed    : 4/19/2022 4:56:47 PM by SYSTEM
Analysis Method : D:\METHOD\HMF_cot 150_hat_nho_KQ.M
Last changed    : 5/14/2022 2:06:57 PM by SYSTEM
Additional Info : Peak(s) manually integrated
  
```

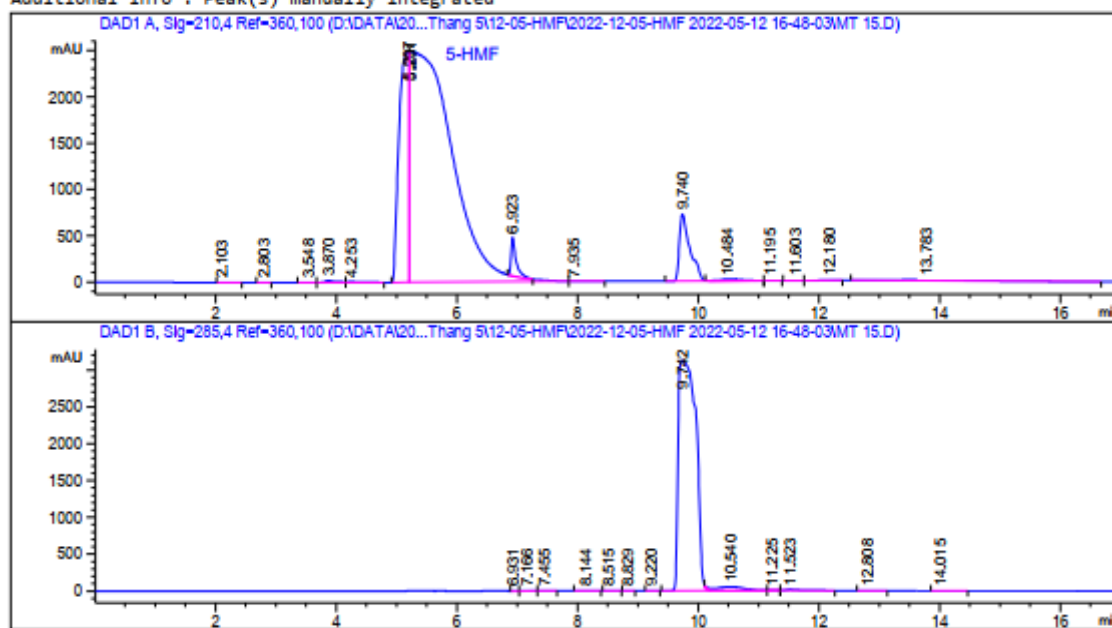

External Standard Report

```

Sorted By      : Signal
Calib. Data Modified : 5/13/2022 1:43:08 AM
Multiplier     : 1.0000
Dilution       : 1.0000
Do not use Multiplier & Dilution Factor with ISTDs
  
```

Signal 1: DAD1 A, Sig=210,4 Ref=360,100

| RetTime [min] | Type | Area [mAU*s] | Amt/Area   | Amount [ppm] | Grp | Name           |
|---------------|------|--------------|------------|--------------|-----|----------------|
| 3.548         | BB   | 4.94284      | 2.38541    | 11.79069     |     | Formic acid    |
| 8.700         |      | -            | -          | -            |     | Levulinic acid |
| 9.740         | BV R | 8814.55078   | 1.23612e-1 | 1089.58840   |     | HMF            |
| 10.484        | VB E | 514.49731    | 5.70333e-2 | 29.34348     |     | DFF            |
| 11.195        | BB   | 11.94851     | 0.00000    | 0.00000      |     | FDCA           |
| 11.603        | BV   | 23.86707     | 7.68687e-2 | 1.83463      |     | Furfural       |

**Figure S4-3:** HPLC chromatography of 5-HMF in investigating catalytic performance. Reaction conditions: Fructose (1mmol), DMSO, for 3 hours at 120 °C.

Data File D:\DATA\2022\Thang 5\12-05-HMF\2022-12-05-HMF 2022-05-12 16-48-03\MT 16.D  
 Sample Name: MT 16

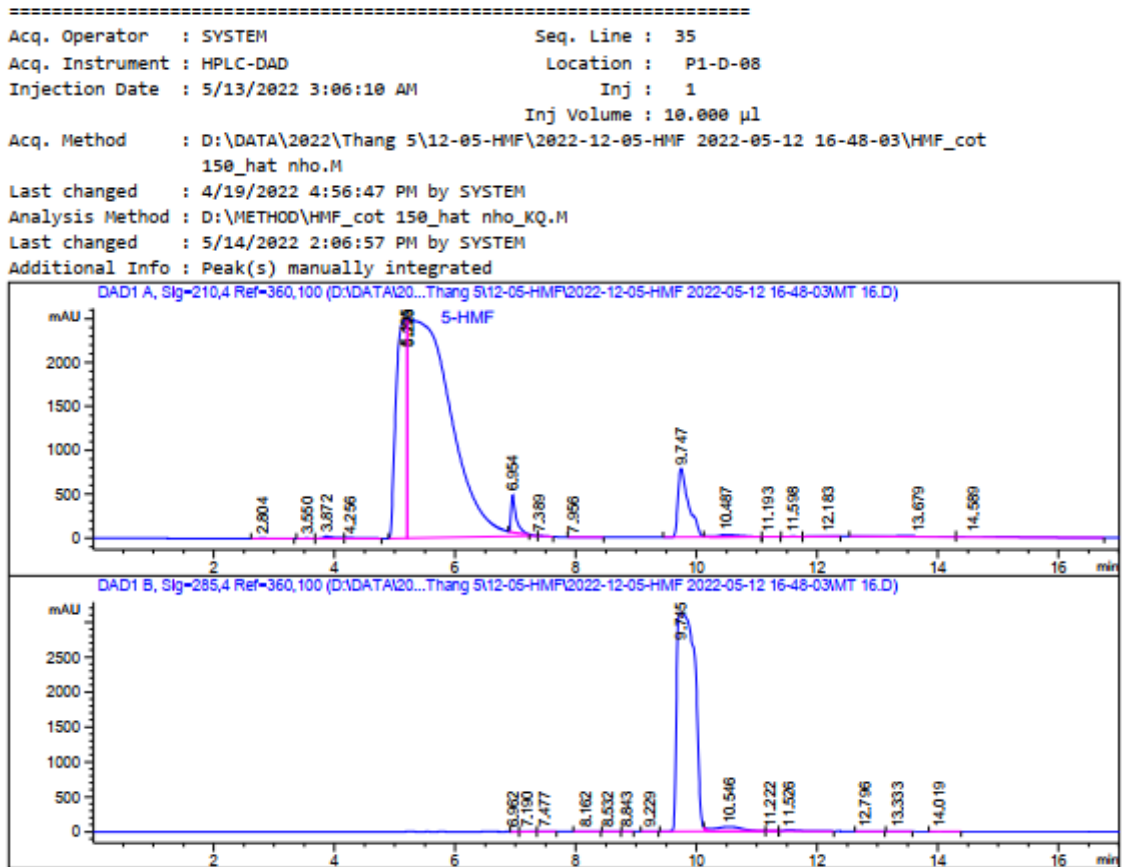

External Standard Report

```

Sorted By      : Signal
Calib. Data Modified : 5/13/2022 1:43:08 AM
Multiplier    : 1.0000
Dilution      : 1.0000
Do not use Multiplier & Dilution Factor with ISTDs
  
```

Signal 1: DAD1 A, Sig=210,4 Ref=360,100

| RetTime [min] | Type | Area [mAU*s] | Amt/Area   | Amount [ppm] | Grp | Name           |
|---------------|------|--------------|------------|--------------|-----|----------------|
| 3.550         | BB   | 5.72457      | 2.23379    | 12.78752     |     | Formic acid    |
| 8.700         |      | -            | -          | -            |     | Levulinic acid |
| 9.747         | BV R | 9574.73145   | 1.23625e-1 | 1183.67713   |     | HMF            |
| 10.487        | VB E | 637.41016    | 5.79379e-2 | 36.93020     |     | DFF            |
| 11.193        | BB   | 14.78250     | 0.00000    | 0.00000      |     | FDCA           |
| 11.598        | BV   | 30.35662     | 8.31934e-2 | 2.52547      |     | Furfural       |

**Figure S4-4:** HPLC chromatography of 5-HMF in investigating catalytic performance. Reaction conditions: Fructose (1mmol), DMSO, for 6 hours at 120 °C.

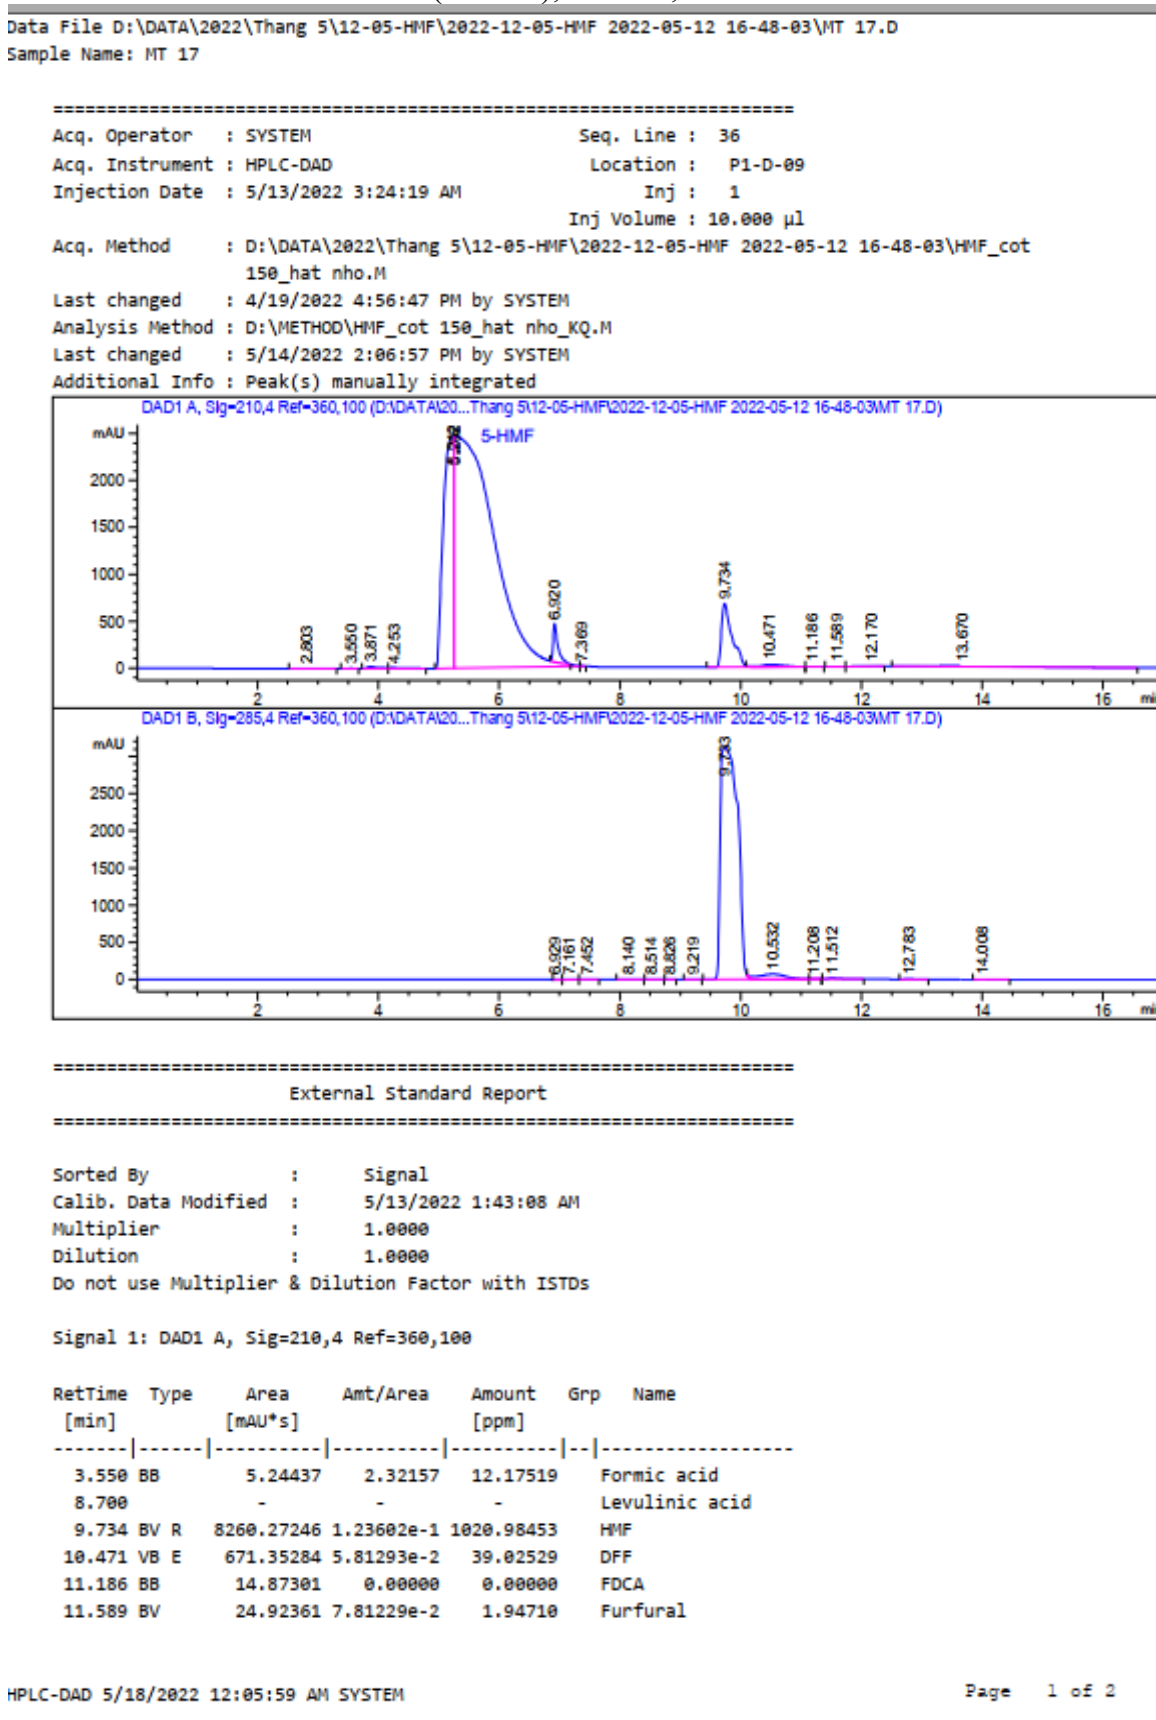

**Figure S4-5:** HPLC chromatography of 5-HMF in investigating catalytic performance. Reaction conditions: Fructose (1mmol), DMSO, for 8 hours at 120 °C.

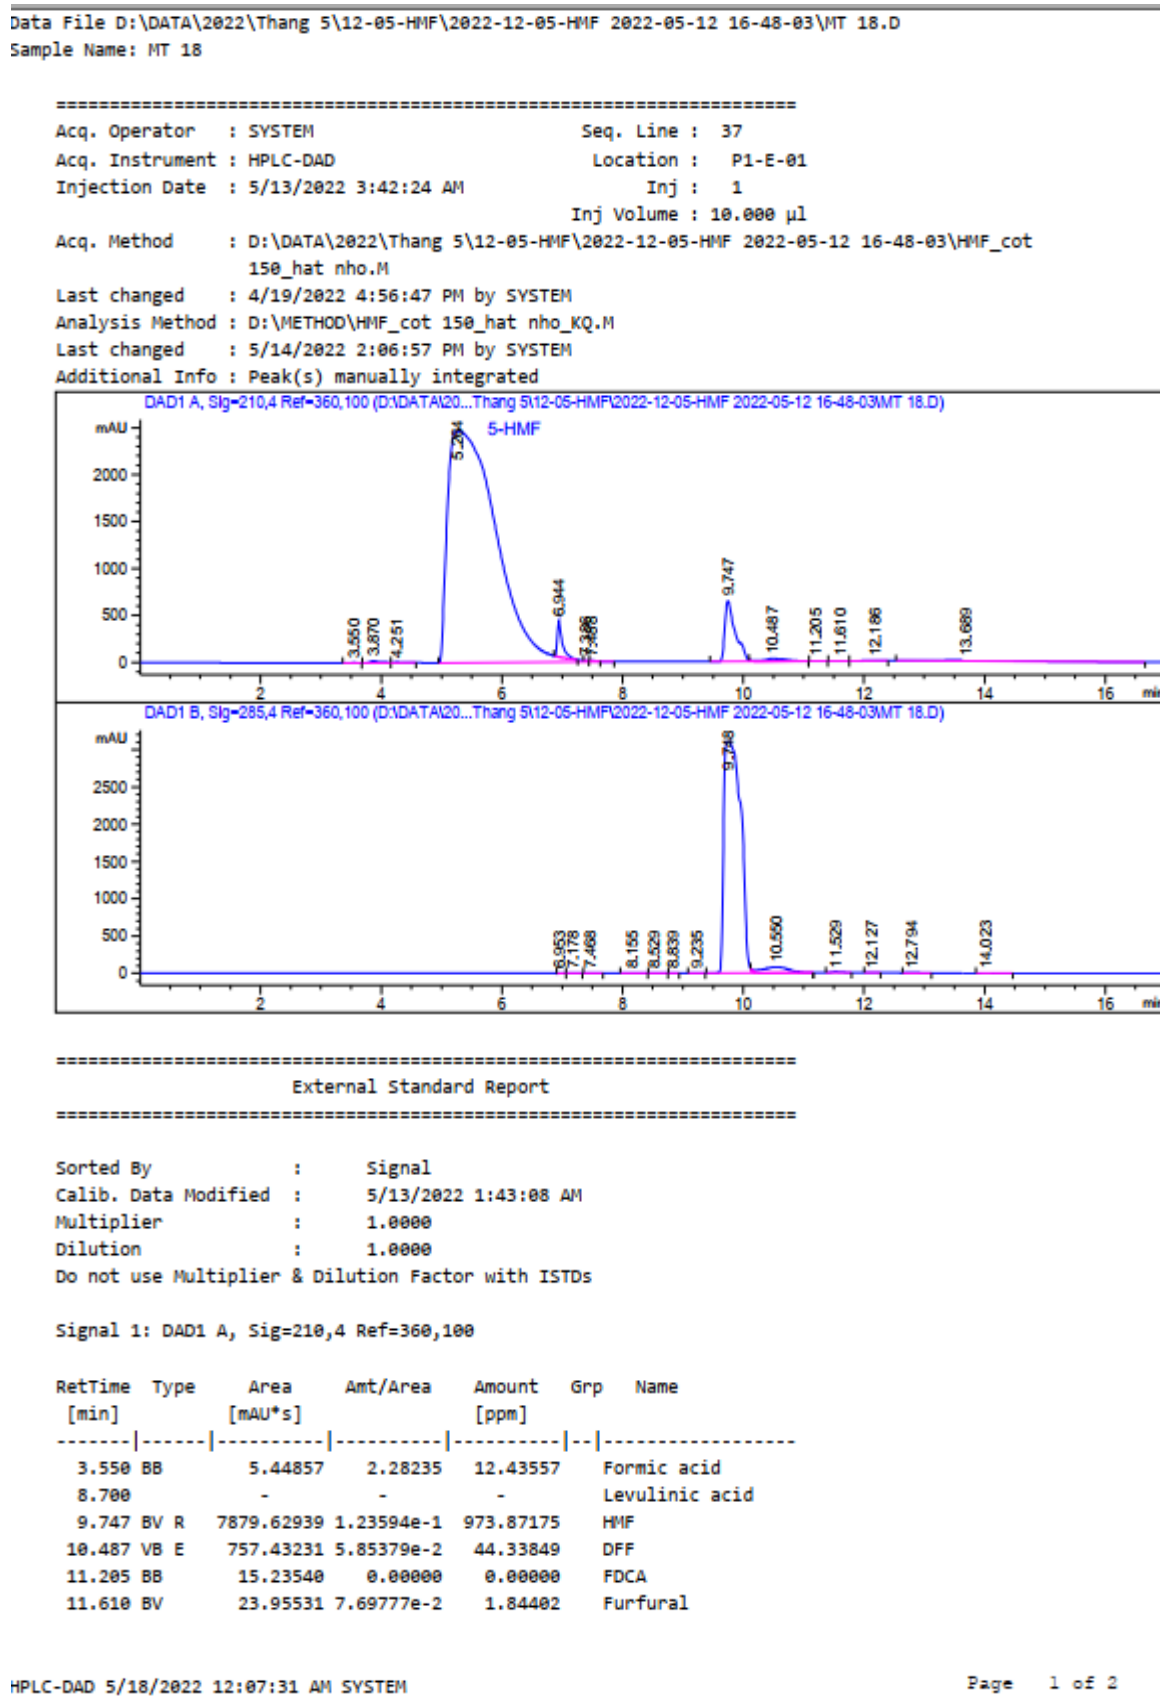

**Figure S4-6:** HPLC chromatography of 5-HMF in investigating catalytic performance. Reaction conditions: Fructose (1mmol), DMSO, for 9 hours at 120 °C.

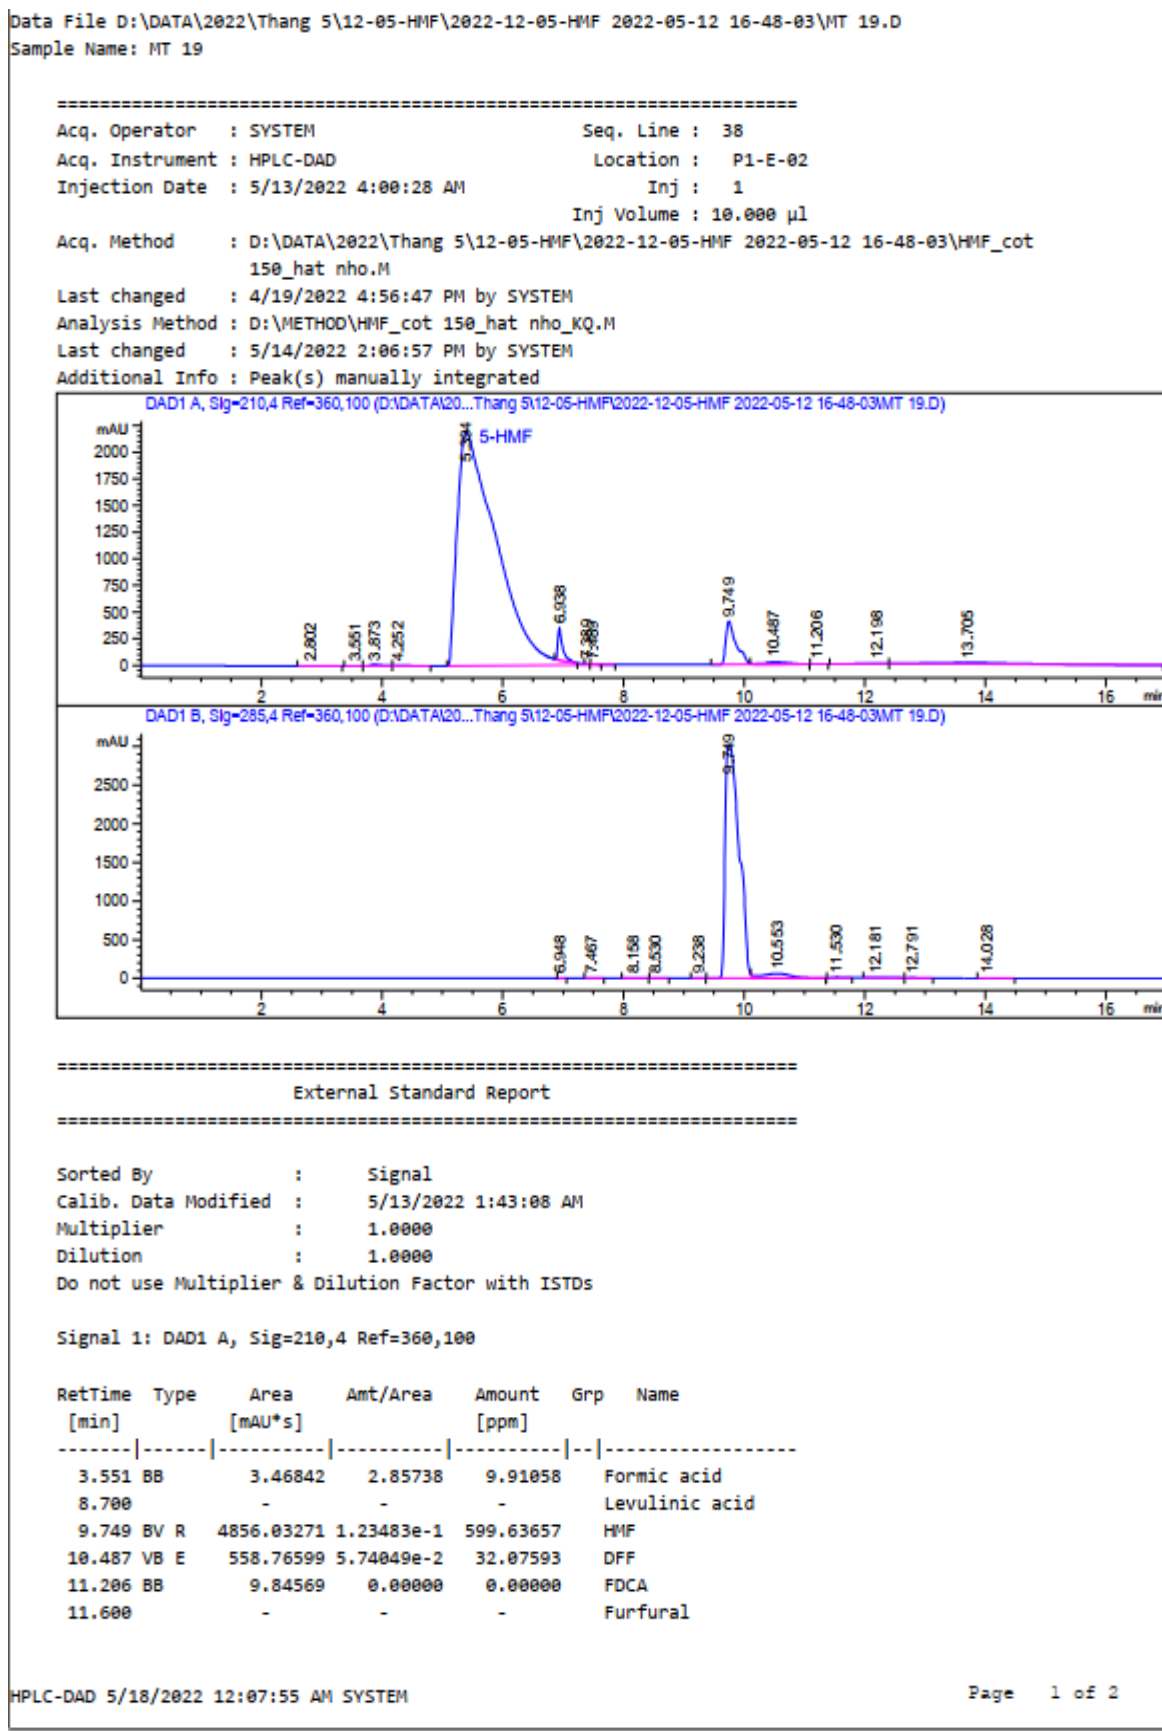



**Figure S4-7:** HPLC chromatography of 5-HMF in investigating catalytic performance. Reaction conditions: Fructose (1mmol), DMSO, for 10 hours at 120 °C.

Data File D:\DATA\2022\Thang 5\12-05-HMF\2022-12-05-HMF 2022-05-12 16-48-03\MT 20.D  
 Sample Name: MT 20

```

=====
Acq. Operator   : SYSTEM                      Seq. Line :   39
Acq. Instrument : HPLC-DAD                   Location  : P1-E-03
Injection Date  : 5/13/2022 4:18:31 AM       Inj       :    1
                                           Inj Volume: 10.000 µl
Acq. Method     : D:\DATA\2022\Thang 5\12-05-HMF\2022-12-05-HMF 2022-05-12 16-48-03\HMF_cot
                                           150_hat_nho.M
Last changed    : 4/19/2022 4:56:47 PM by SYSTEM
Analysis Method : D:\METHOD\HMF_cot 150_hat_nho_KQ.M
Last changed    : 5/14/2022 2:06:57 PM by SYSTEM
Additional Info  : Peak(s) manually integrated
    
```

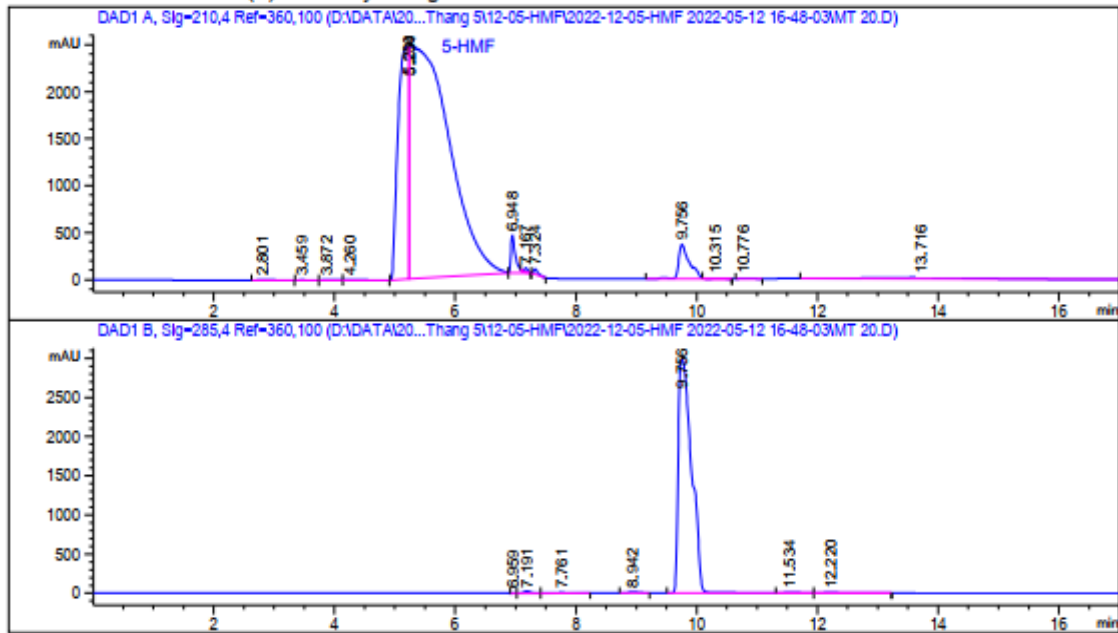

External Standard Report

```

Sorted By      : Signal
Calib. Data Modified : 5/13/2022 1:43:08 AM
Multiplier     : 1.0000
Dilution       : 1.0000
Do not use Multiplier & Dilution Factor with ISTDs
    
```

Signal 1: DAD1 A, Sig=210,4 Ref=360,100

| RetTime [min] | Type | Area [mAU*s] | Amt/Area   | Amount [ppm] | Grp | Name           |
|---------------|------|--------------|------------|--------------|-----|----------------|
| 3.600         | -    | -            | -          | -            | -   | Formic acid    |
| 8.700         | -    | -            | -          | -            | -   | Levulinic acid |
| 9.756         | VV R | 4572.72998   | 1.23465e-1 | 564.57176    | -   | HMF            |
| 10.315        | VB E | 36.16873     | 0.00000    | 0.00000      | -   | DFF            |
| 10.776        | BB   | 19.69633     | 3.91499e-2 | 7.71110e-1   | -   | FDCA           |
| 11.600        | -    | -            | -          | -            | -   | Furfural       |

**Figure S4-8:** HPLC chromatography of 5-HMF in investigating catalytic performance. Reaction conditions: Fructose (1mmol), DMSO, for 11 hours at 120 °C.

Data File D:\DATA\2022\Thang 5\12-05-HMF\2022-12-05-HMF 2022-05-12 16-48-03\MT 21.D  
 Sample Name: MT 21

```

=====
Acq. Operator   : SYSTEM                      Seq. Line : 40
Acq. Instrument : HPLC-DAD                    Location  : P1-E-04
Injection Date  : 5/13/2022 4:36:35 AM        Inj       : 1
                                           Inj Volume: 10.000 µl
Acq. Method     : D:\DATA\2022\Thang 5\12-05-HMF\2022-12-05-HMF 2022-05-12 16-48-03\HMF_cot
                                           150_hat_nho.M
Last changed    : 4/19/2022 4:56:47 PM by SYSTEM
Analysis Method : D:\METHOD\HMF_cot 150_hat_nho_KQ.M
Last changed    : 5/14/2022 2:06:57 PM by SYSTEM
Additional Info : Peak(s) manually integrated
  
```

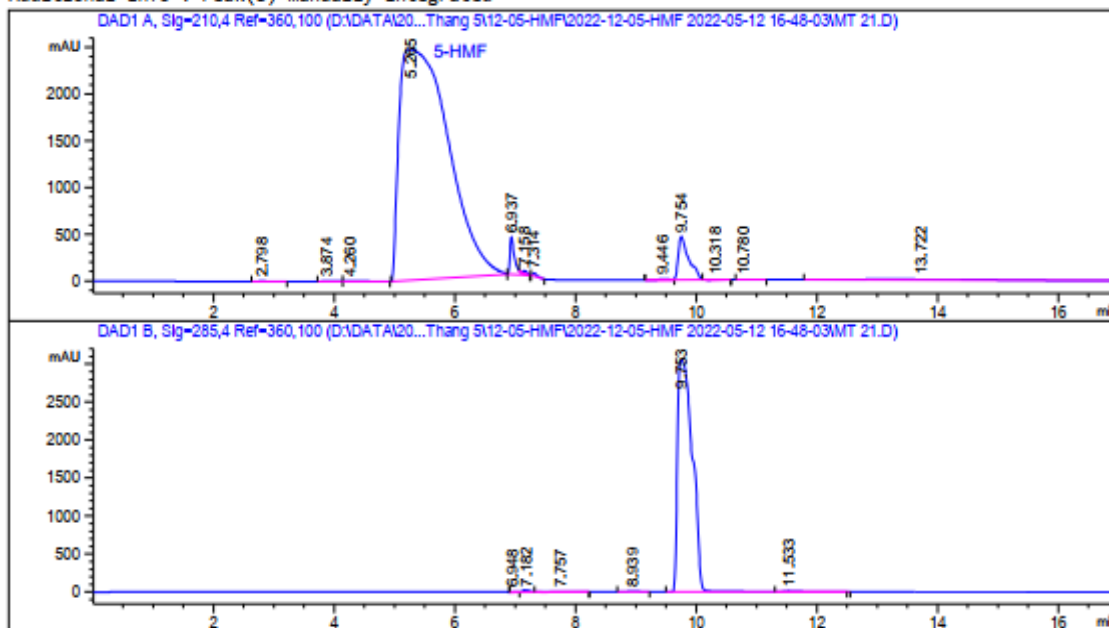

External Standard Report

```

Sorted By      : Signal
Calib. Data Modified : 5/13/2022 1:43:08 AM
Multiplier     : 1.0000
Dilution       : 1.0000
Do not use Multiplier & Dilution Factor with ISTDs
  
```

Signal 1: DAD1 A, Sig=210,4 Ref=360,100

| RetTime [min] | Type | Area [mAU*s] | Amt/Area   | Amount [ppm] | Grp | Name           |
|---------------|------|--------------|------------|--------------|-----|----------------|
| 3.600         | -    | -            | -          | -            | -   | Formic acid    |
| 8.700         | -    | -            | -          | -            | -   | Levulinic acid |
| 9.754         | VV R | 5639.07373   | 1.23523e-1 | 696.55475    | -   | HMF            |
| 10.318        | VB E | 23.97812     | 0.00000    | 0.00000      | -   | DFF            |
| 10.780        | BB   | 13.14831     | 0.00000    | 0.00000      | -   | FDCA           |
| 11.600        | -    | -            | -          | -            | -   | Furfural       |

**Figure S4-9:** HPLC chromatography of 5-HMF in investigating catalytic performance. Reaction conditions: Fructose (1mmol), DMSO, for 12 hours at 120 °C.

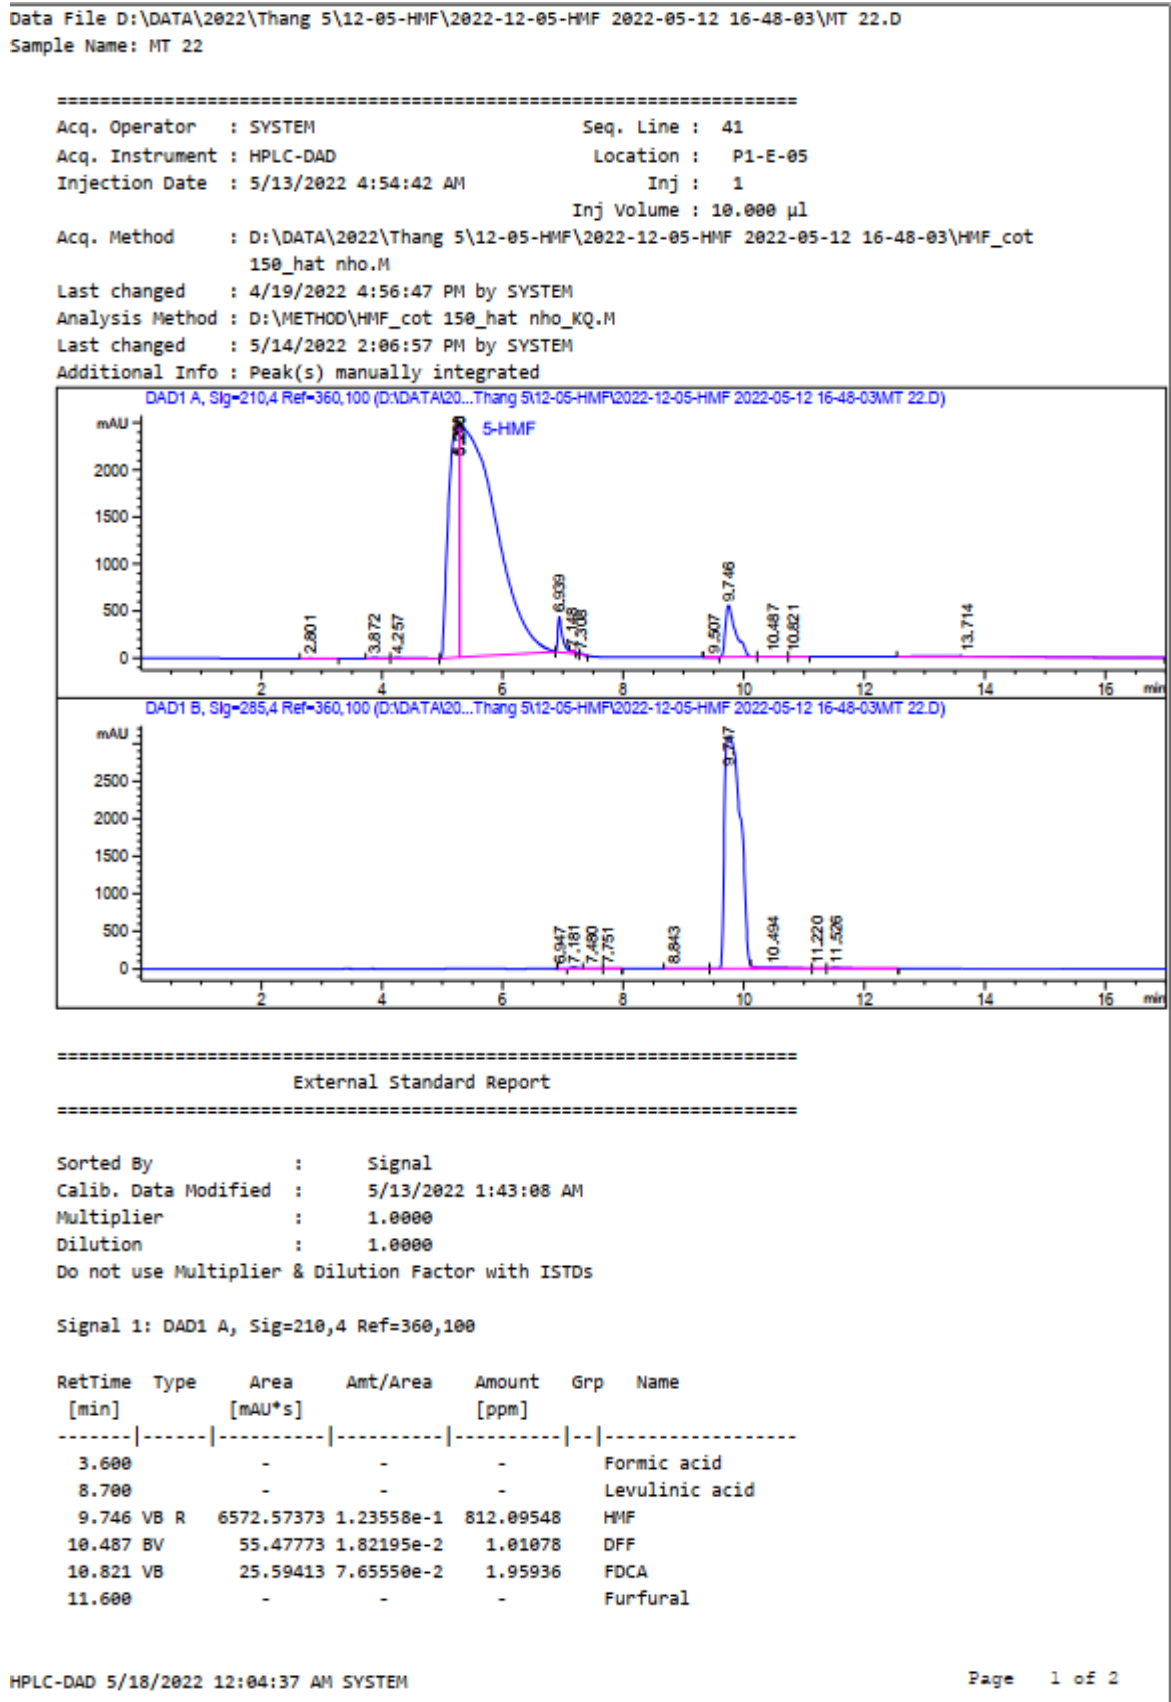

**Figure S4-10:** HPLC chromatography of 5-HMF in investigating catalytic performance. Reaction conditions: Fructose (1mmol), DMSO, for 13 hours at 120 °C.

Data File D:\DATA\2022\Thang 5\12-05-HMF\2022-12-05-HMF 2022-05-12 16-48-03\MT 23.D  
 Sample Name: MT 23

```

=====
Acq. Operator   : SYSTEM                               Seq. Line : 42
Acq. Instrument : HPLC-DAD                             Location  : P1-E-06
Injection Date  : 5/13/2022 5:12:45 AM                 Inj       : 1
                                                    Inj Volume: 10.000 µl
Acq. Method    : D:\DATA\2022\Thang 5\12-05-HMF\2022-12-05-HMF 2022-05-12 16-48-03\HMF_cot
                                                    150_hat_nho.M
Last changed   : 4/19/2022 4:56:47 PM by SYSTEM
Analysis Method: D:\METHOD\HMF_cot 150_hat_nho_KQ.M
Last changed   : 5/14/2022 2:06:57 PM by SYSTEM
Additional Info : Peak(s) manually integrated
  
```

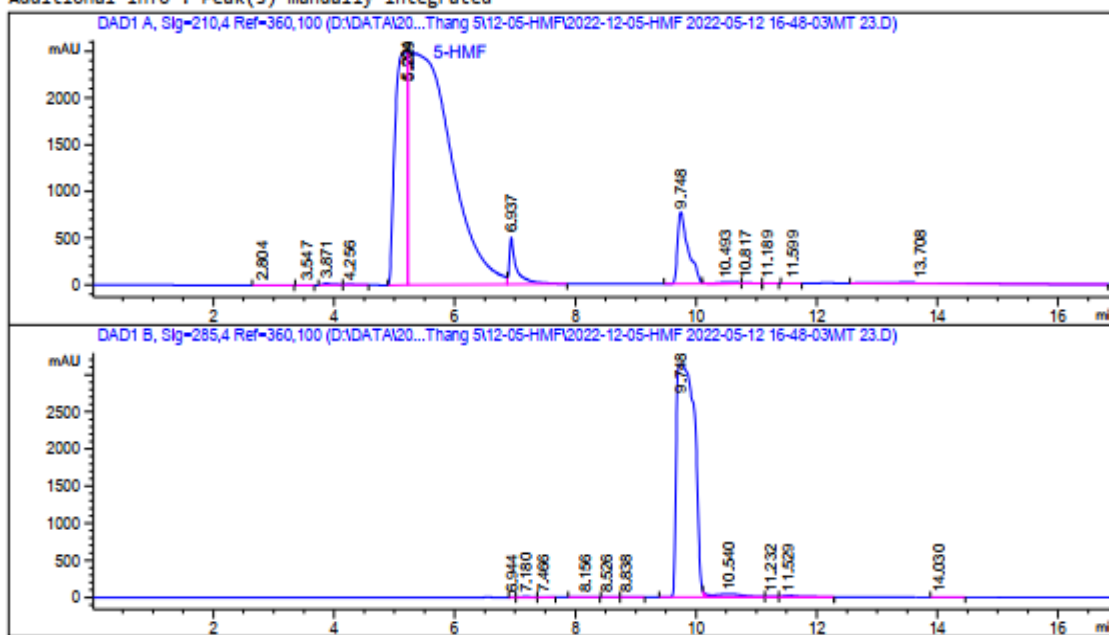

External Standard Report

```

Sorted By      : Signal
Calib. Data Modified : 5/13/2022 1:43:08 AM
Multiplier    : 1.0000
Dilution      : 1.0000
Do not use Multiplier & Dilution Factor with ISTDs
  
```

Signal 1: DAD1 A, Sig=210,4 Ref=360,100

| RetTime [min] | Type | Area [mAU*s] | Amt/Area   | Amount [ppm] | Grp | Name           |
|---------------|------|--------------|------------|--------------|-----|----------------|
| 3.547         | BB   | 5.11074      | 2.34893    | 12.00479     |     | Formic acid    |
| 8.700         |      | -            | -          | -            |     | Levulinic acid |
| 9.748         | BV R | 9428.64746   | 1.23623e-1 | 1165.59609   |     | HMF            |
| 10.493        | VV E | 317.50110    | 5.41227e-2 | 17.18401     |     | DFF            |
| 10.817        | VB E | 81.47691     | 1.62233e-1 | 13.21824     |     | FDCA           |
| 11.599        | BB   | 16.65361     | 6.40537e-2 | 1.06673      |     | Furfural       |

**Figure S4-11:** HPLC chromatography of 5-HMF in investigating catalytic performance. Reaction conditions: Fructose (1mmol), DMSO, for 30 minutes at 120 °C.

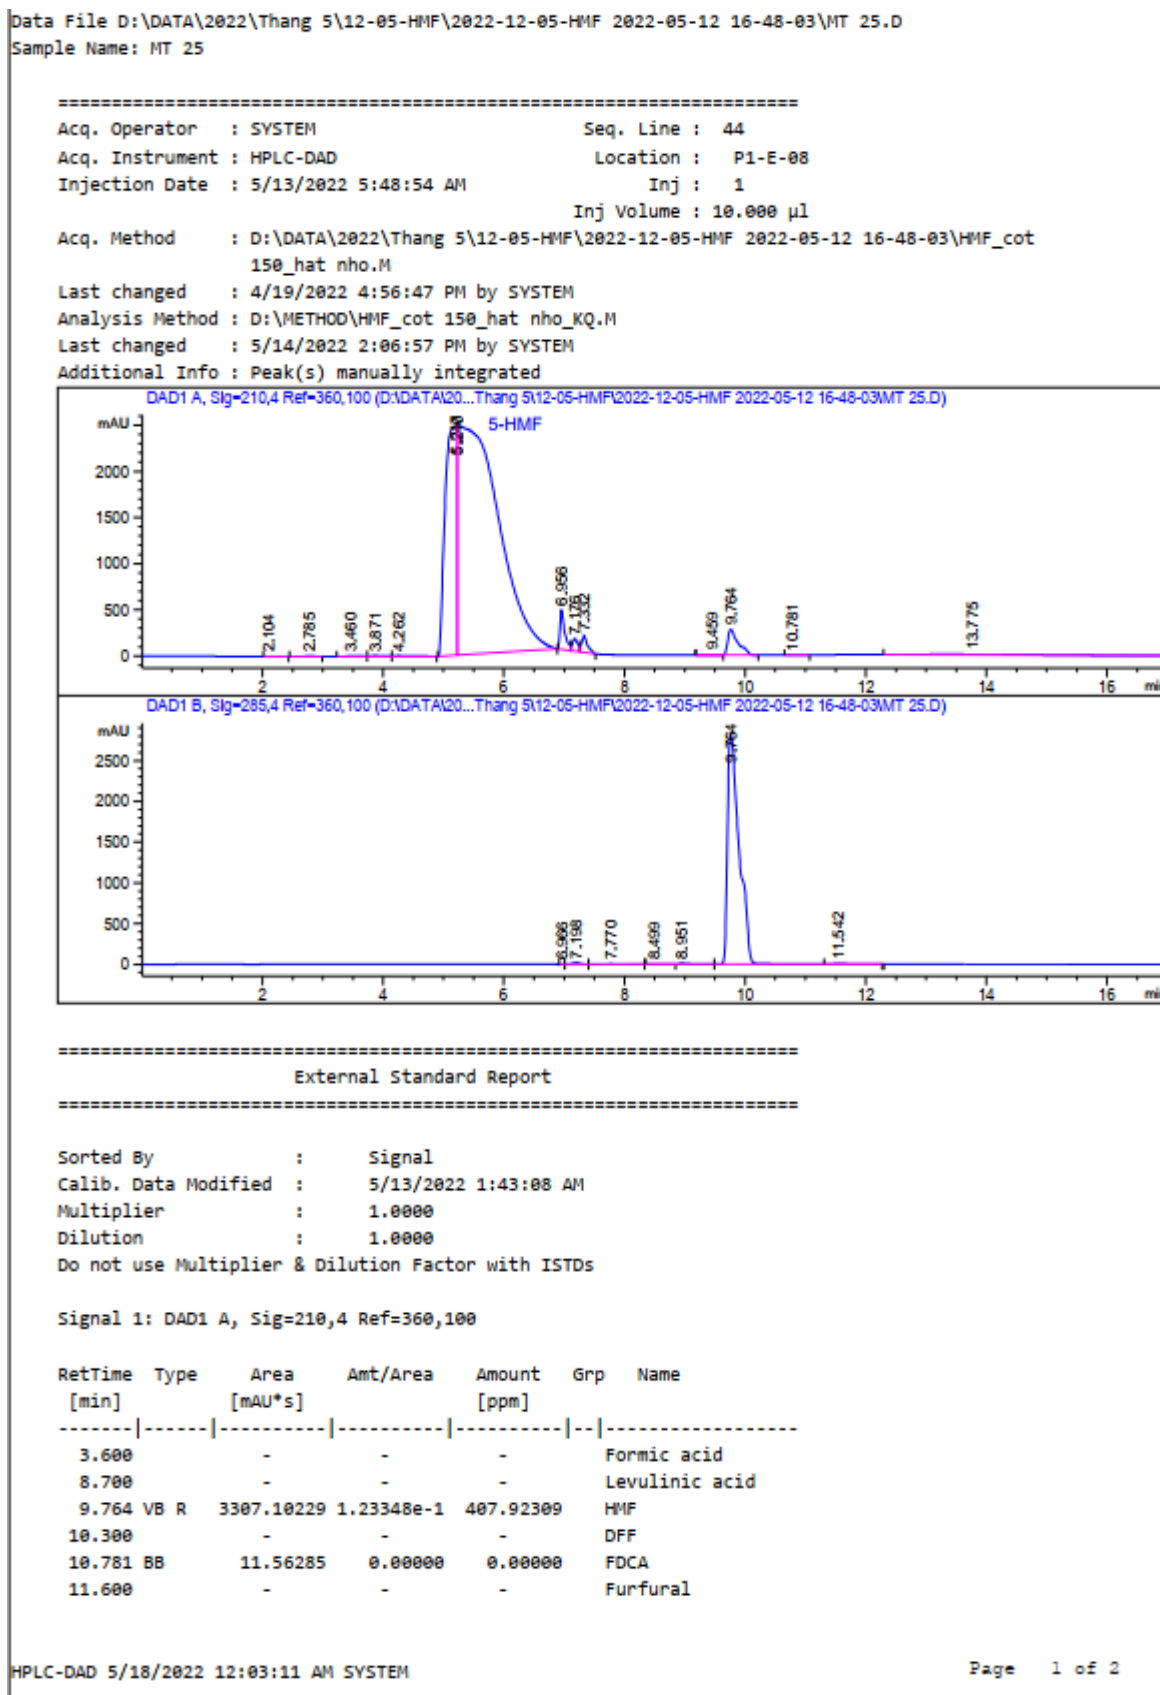

**Figure S4-12: HPLC chromatography of 5-HMF in investigating catalytic performance.**  
 Reaction conditions: Fructose (1mmol), DMSO, for 1 hour at 120 °C.

Data File D:\DATA\2022\Thang 5\12-05-HMF\2022-12-05-HMF 2022-05-12 16-48-03\MT 26.D

Sample Name: MT 26

```

=====
Acq. Operator   : SYSTEM                      Seq. Line : 45
Acq. Instrument : HPLC-DAD                   Location  : P1-E-09
Injection Date  : 5/13/2022 6:06:56 AM       Inj       : 1
                                           Inj Volume: 10.000 µl
Acq. Method     : D:\DATA\2022\Thang 5\12-05-HMF\2022-12-05-HMF 2022-05-12 16-48-03\HMF_cot
                  150_hat_nho.M
Last changed    : 4/19/2022 4:56:47 PM by SYSTEM
Analysis Method : D:\METHOD\HMF_cot 150_hat_nho_KQ.M
Last changed    : 5/14/2022 2:06:57 PM by SYSTEM
Additional Info  : Peak(s) manually integrated
    
```

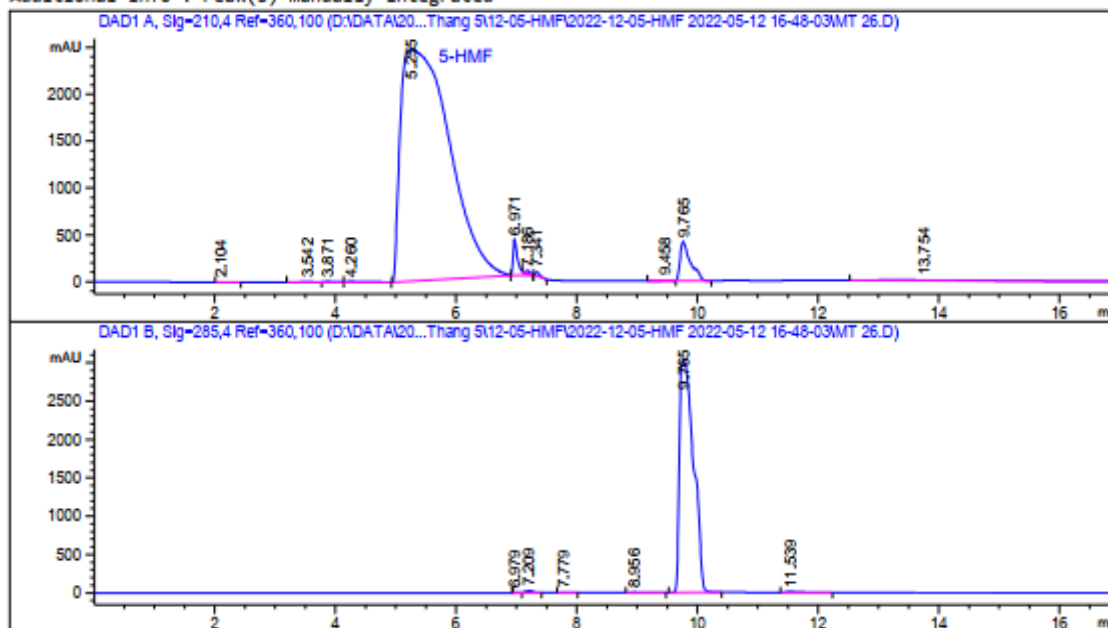

External Standard Report

```

Sorted By      : Signal
Calib. Data Modified : 5/13/2022 1:43:08 AM
Multiplier     : 1.0000
Dilution       : 1.0000
Do not use Multiplier & Dilution Factor with ISTDs
    
```

Signal 1: DAD1 A, Sig=210,4 Ref=360,100

| RetTime [min] | Type | Area [mAU*s] | Amt/Area   | Amount [ppm] | Grp | Name           |
|---------------|------|--------------|------------|--------------|-----|----------------|
| 3.542         | BV E | 18.83975     | 1.56644    | 29.51135     |     | Formic acid    |
| 8.700         |      | -            | -          | -            |     | Levulinic acid |
| 9.765         | VB R | 4957.31104   | 1.23489e-1 | 612.17194    |     | HMF            |
| 10.300        |      | -            | -          | -            |     | DFF            |
| 11.000        |      | -            | -          | -            |     | FDCA           |
| 11.600        |      | -            | -          | -            |     | Furfural       |

**Figure S4-13:** HPLC chromatography of 5-HMF in investigating catalytic performance. Reaction conditions: Fructose (1mmol), DMSO, for 3 hours at 120 °C.

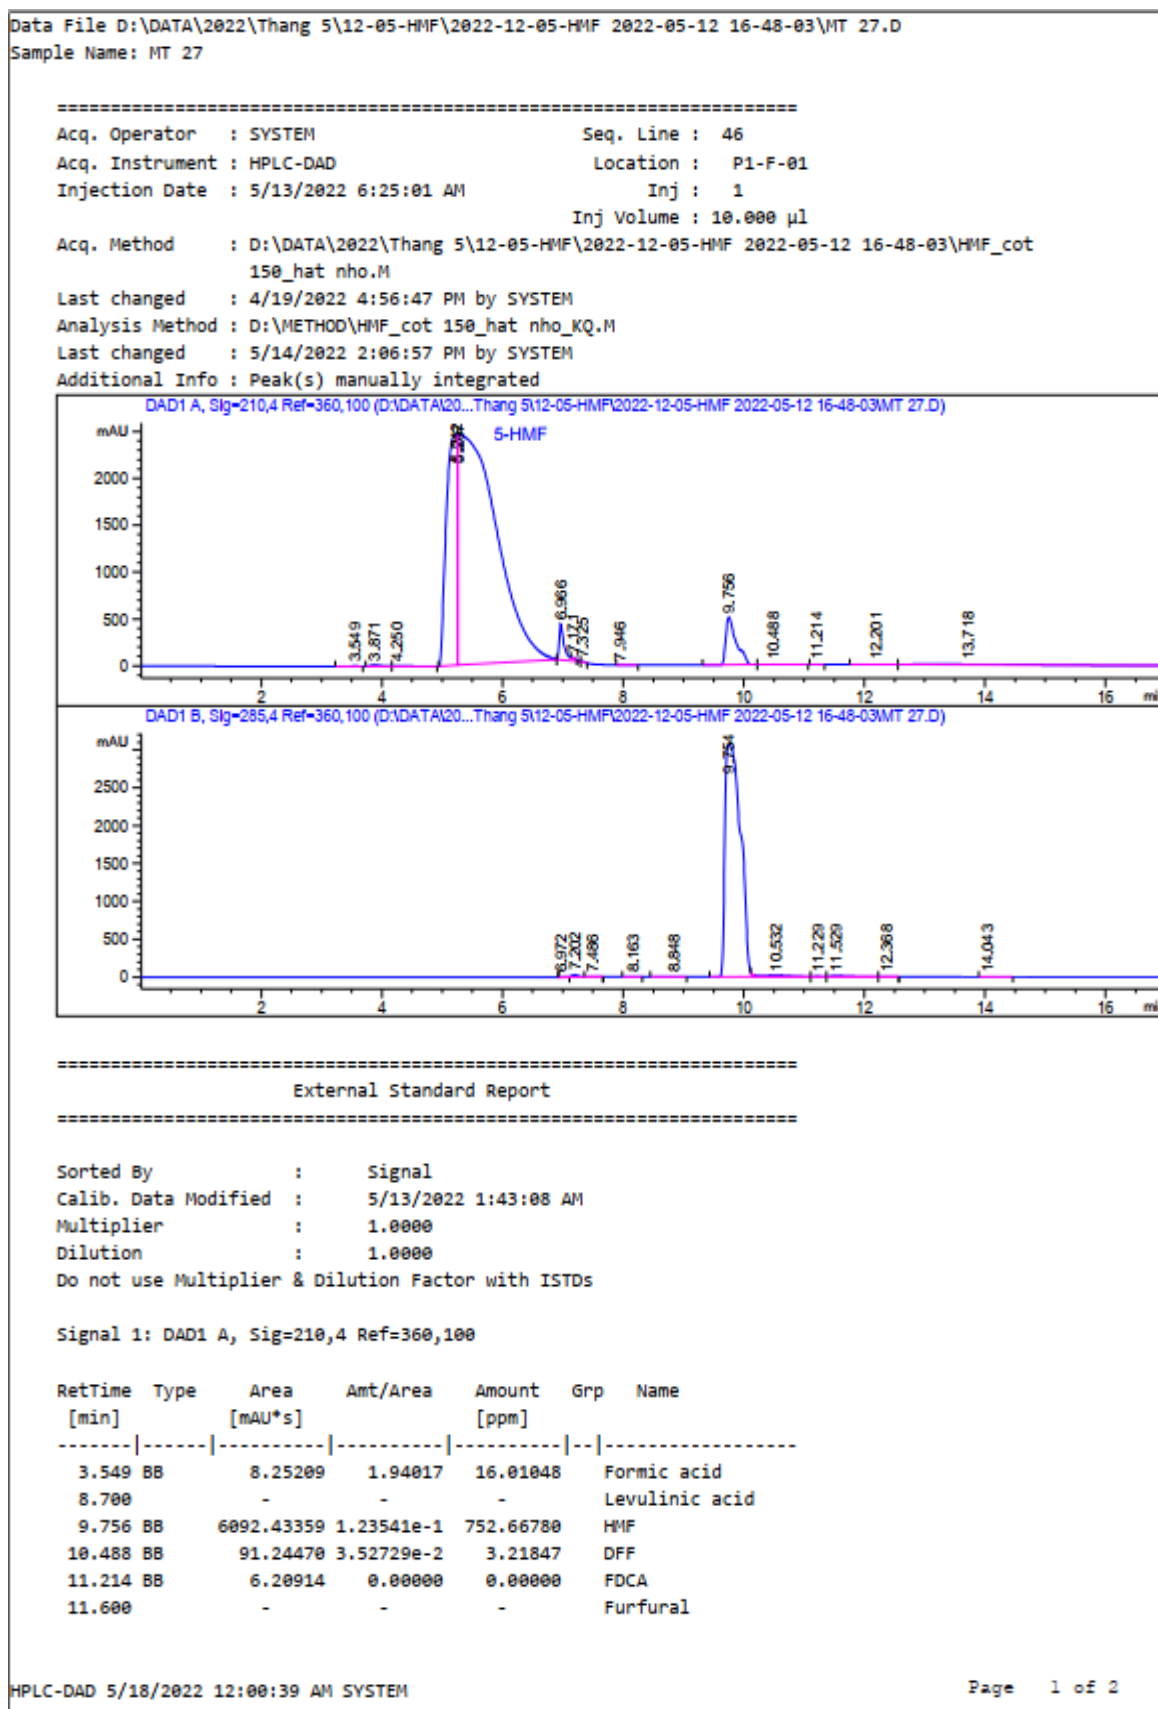



**Figure S4-14:** HPLC chromatography of 5-HMF in investigating catalytic performance. Reaction conditions: Fructose (1mmol), DMSO, for 6 hours at 120 °C.

Data File D:\DATA\2022\Thang 5\12-05-HMF\2022-12-05-HMF 2022-05-12 16-48-03\MT 28.D  
 Sample Name: MT 28

```

=====
Acq. Operator   : SYSTEM                      Seq. Line : 47
Acq. Instrument : HPLC-DAD                   Location  : P1-F-02
Injection Date  : 5/13/2022 6:43:04 AM      Inj       : 1
                                           Inj Volume: 10.000 µl
Acq. Method     : D:\DATA\2022\Thang 5\12-05-HMF\2022-12-05-HMF 2022-05-12 16-48-03\HMF_cot
                                           150_hat_nho.M
Last changed    : 4/19/2022 4:56:47 PM by SYSTEM
Analysis Method : D:\METHOD\HMF_cot 150_hat_nho_KQ.M
Last changed    : 5/14/2022 2:06:57 PM by SYSTEM
Additional Info : Peak(s) manually integrated
  
```

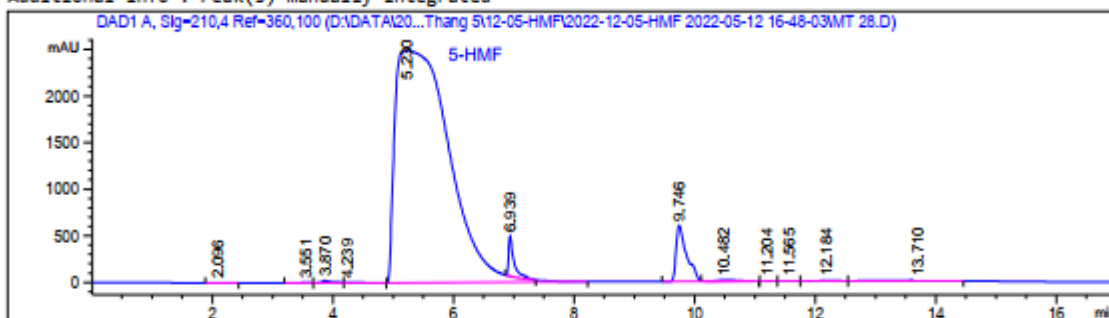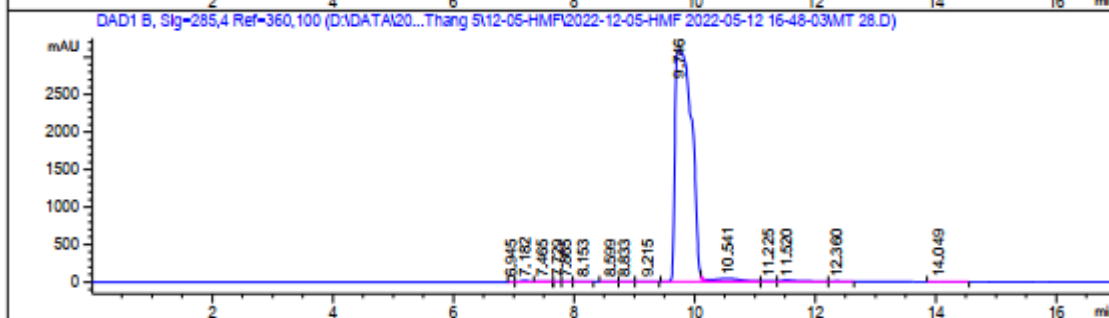

External Standard Report

```

Sorted By      : Signal
Calib. Data Modified : 5/13/2022 1:43:08 AM
Multiplier     : 1.0000
Dilution       : 1.0000
Do not use Multiplier & Dilution Factor with ISTDs
  
```

Signal 1: DAD1 A, Sig=210,4 Ref=360,100

| RetTime [min] | Type | Area [mAU*s] | Amt/Area   | Amount [ppm] | Grp | Name           |
|---------------|------|--------------|------------|--------------|-----|----------------|
| 3.551         | BB   | 10.62946     | 1.79144    | 19.04198     |     | Formic acid    |
| 8.700         |      | -            | -          | -            |     | Levulinic acid |
| 9.746         | BV R | 7276.29932   | 1.23579e-1 | 899.19667    |     | HMF            |
| 10.482        | VB E | 349.71902    | 5.48230e-2 | 19.17264     |     | DFF            |
| 11.204        | BV   | 25.83689     | 7.77287e-2 | 2.00827      |     | FOCA           |
| 11.565        | VV   | 39.98608     | 8.87952e-2 | 3.55057      |     | Furfural       |



**Figure S4-15:** HPLC chromatography of 5-HMF in investigating catalytic performance. Reaction conditions: Fructose (1mmol), DMSO, for 8 hours at 120 °C.

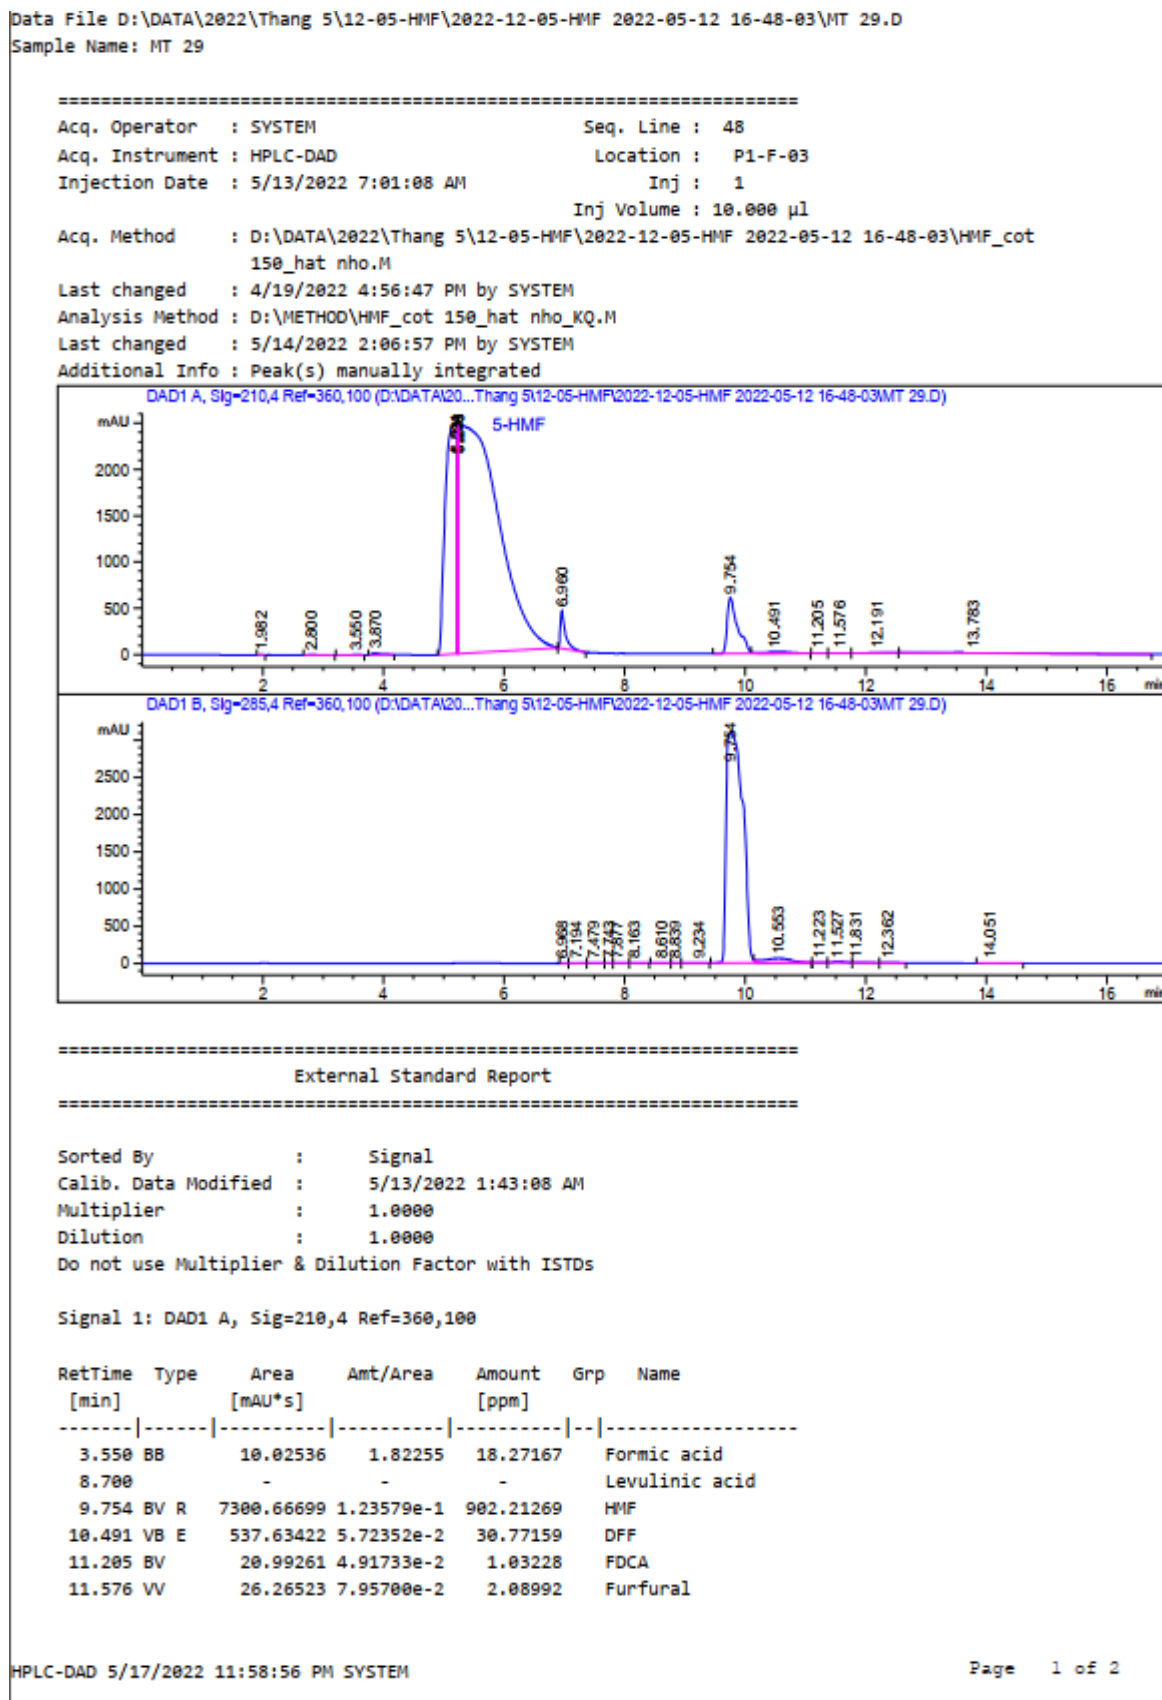

**Figure S4-16:** HPLC chromatography of 5-HMF in investigating catalytic performance. Reaction conditions: Fructose (1mmol), DMSO, for 9 hours at 120 °C.

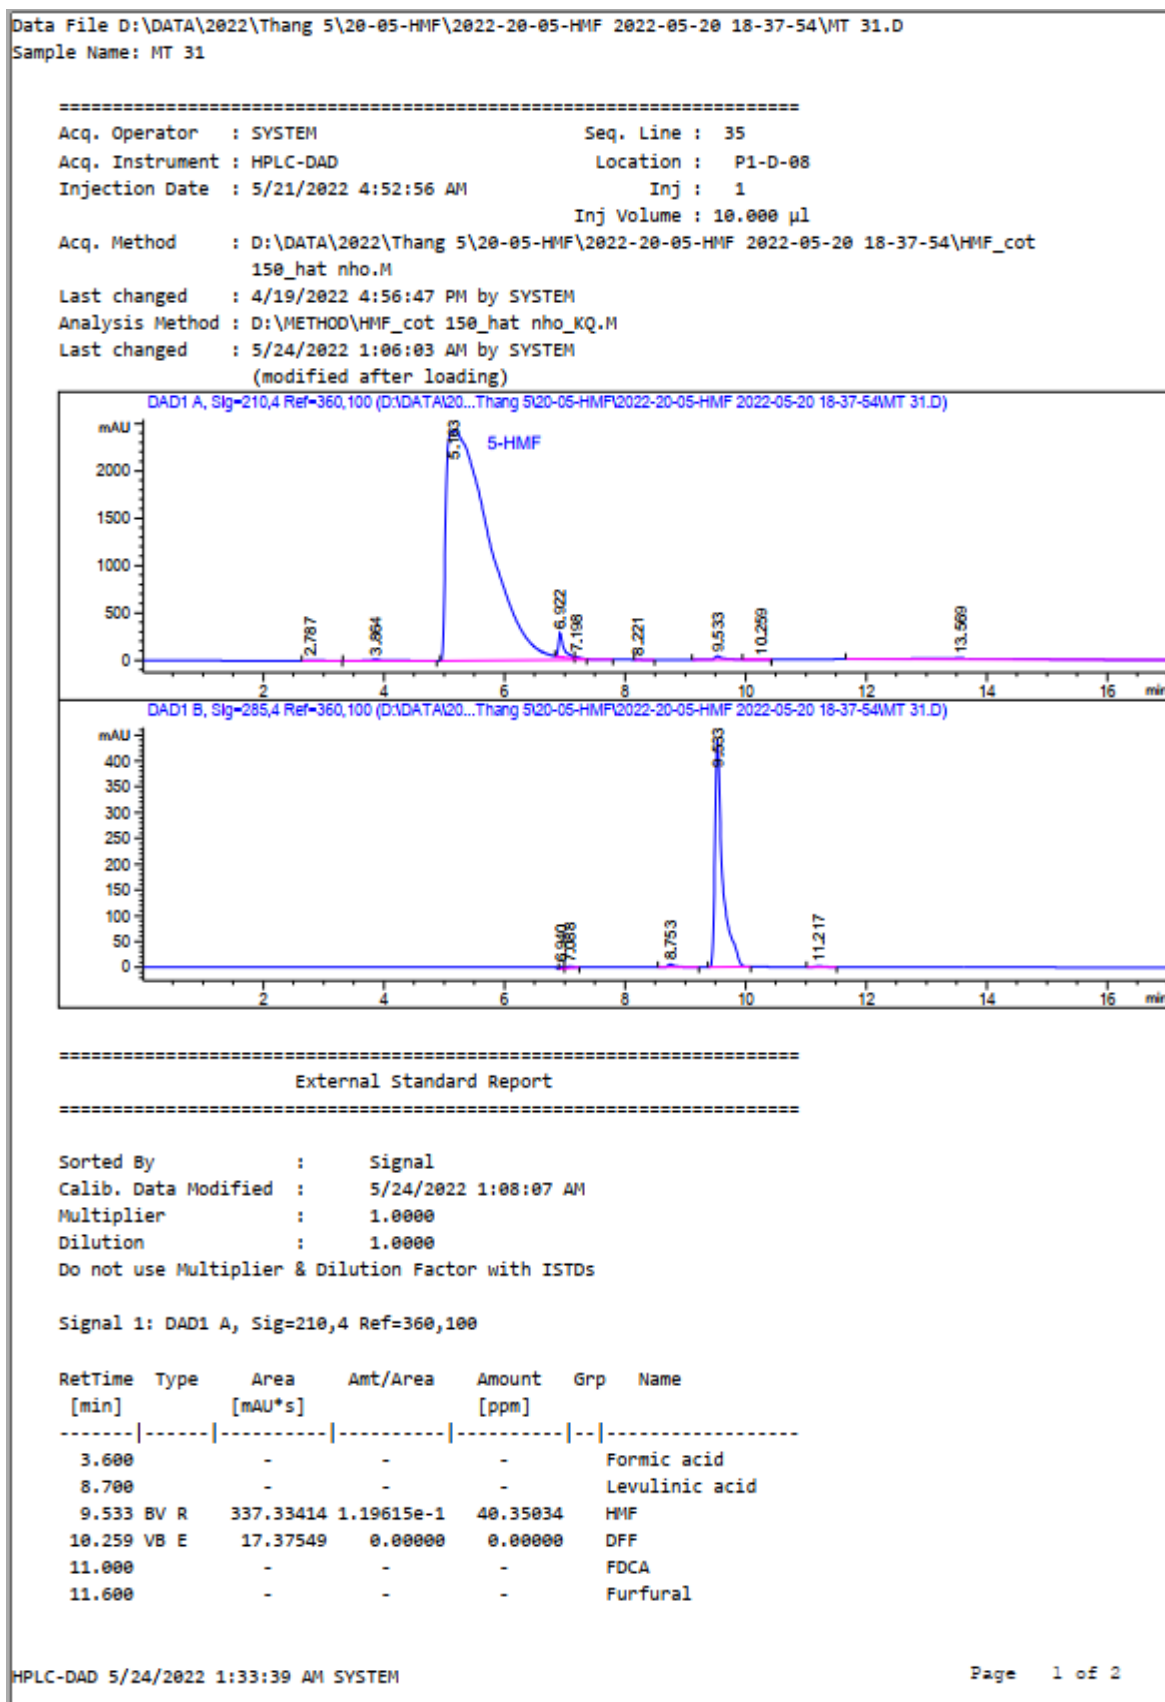

**Figure S4-17:** HPLC chromatography of 5-HMF in investigating catalytic performance. Reaction conditions: Fructose (1mmol), DMSO, for 10 hours at 120 °C.

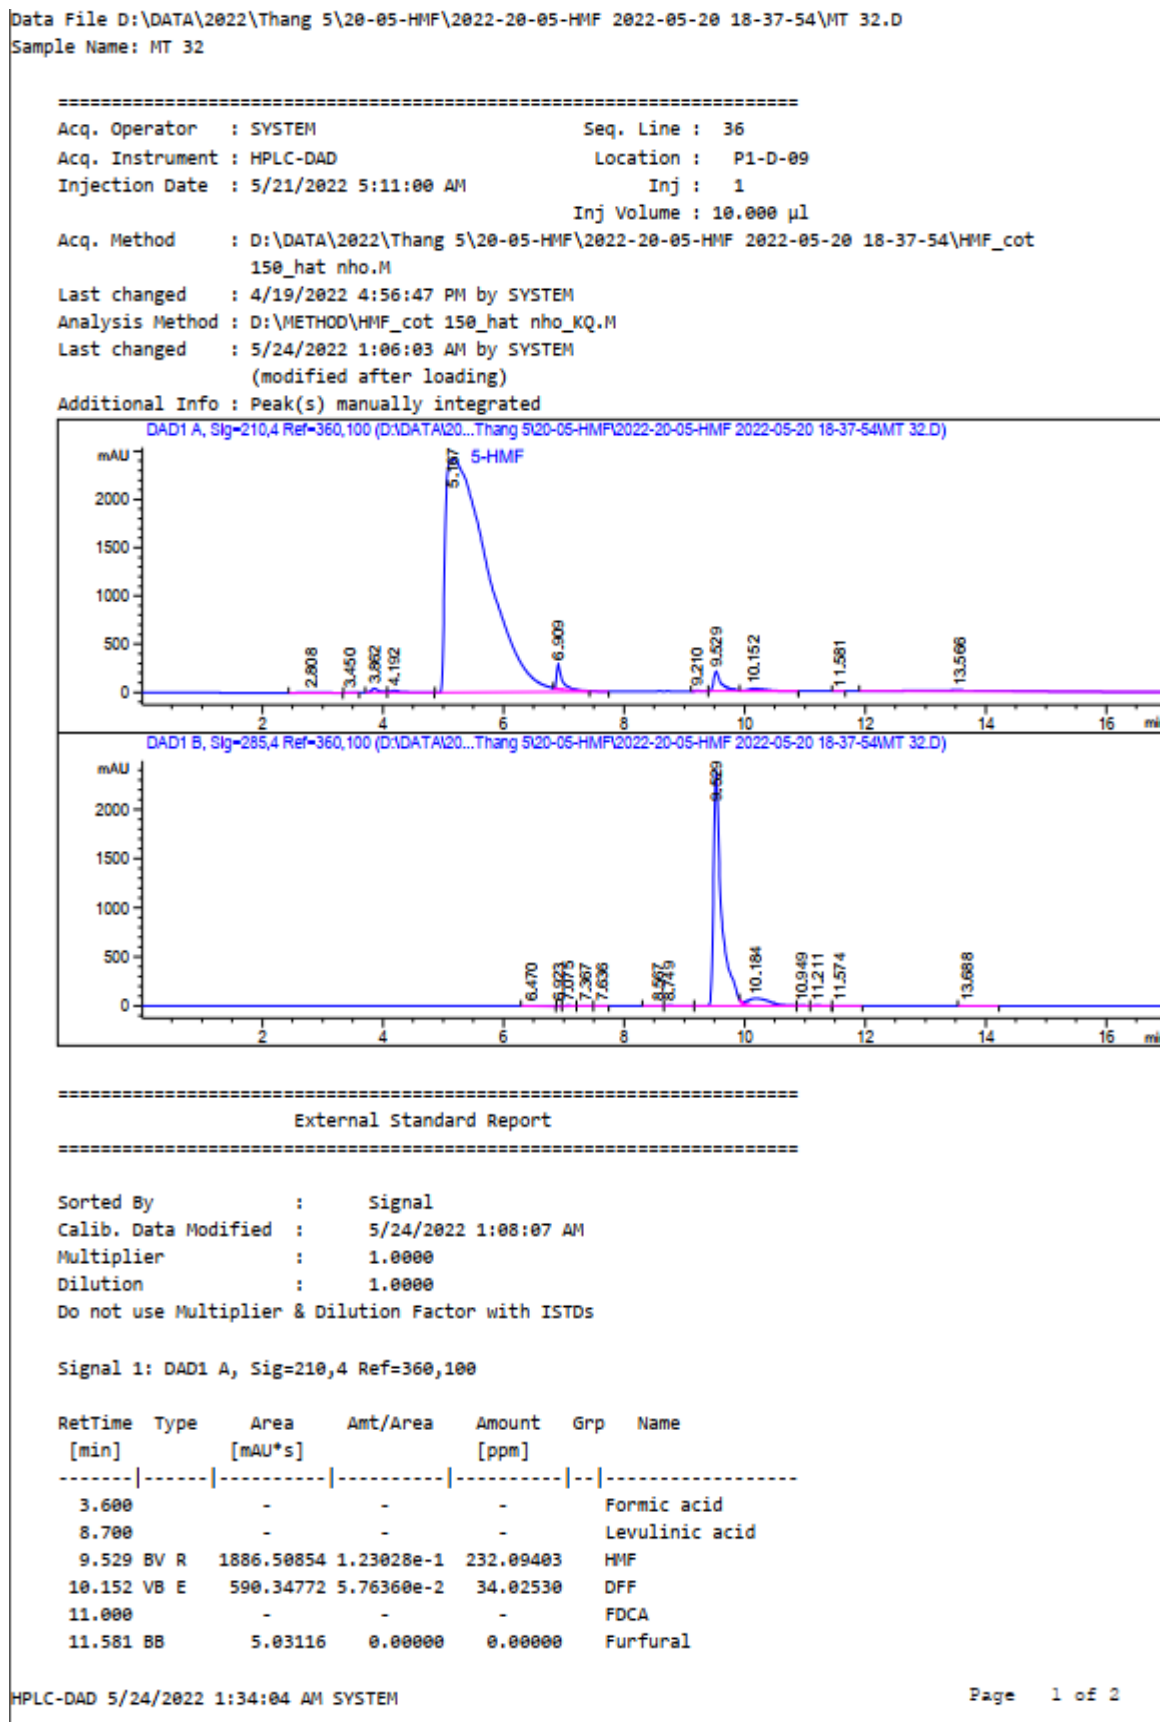

**Figure S4-18:** HPLC chromatography of 5-HMF in investigating catalytic performance. Reaction conditions: Fructose (1mmol), DMSO, for 11 hours at 120 °C.

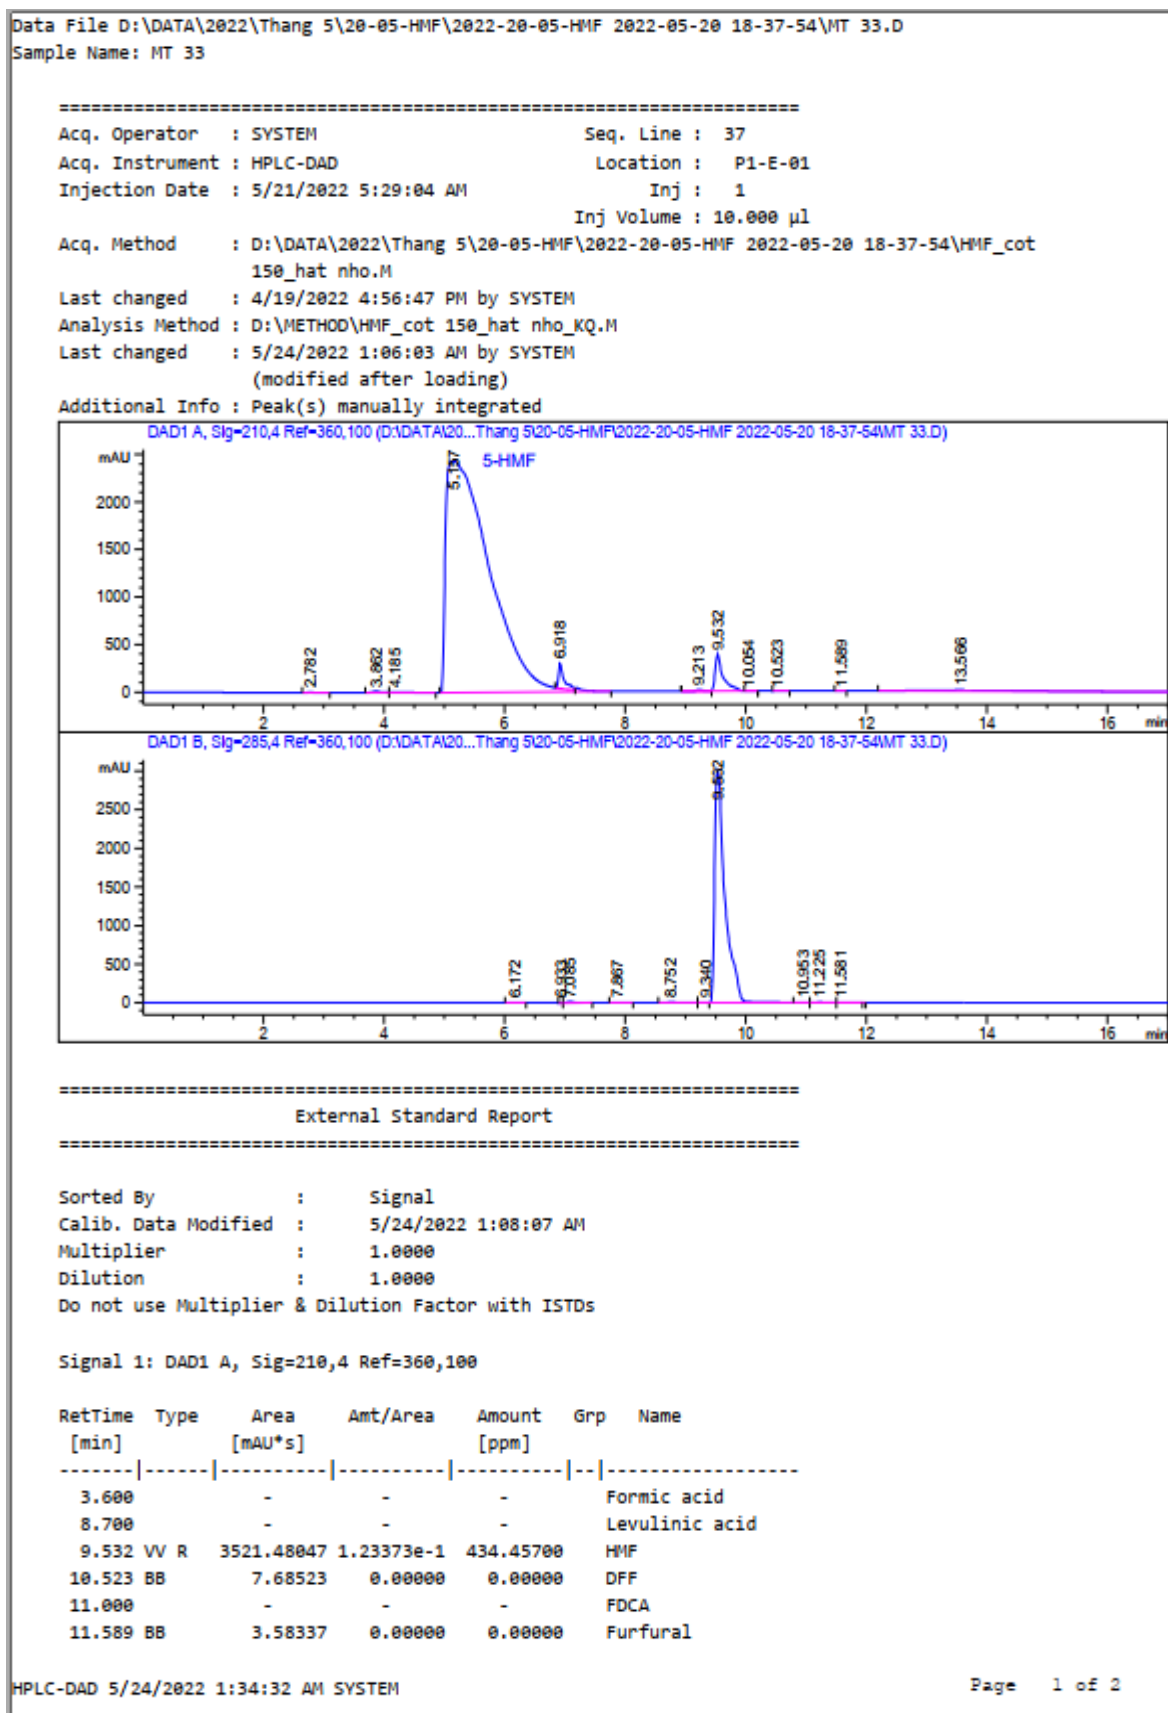

**Figure S4-19:** HPLC chromatography of 5-HMF in investigating catalytic performance. Reaction conditions: Fructose (1mmol), DMSO, for 12 hours at 120 °C.

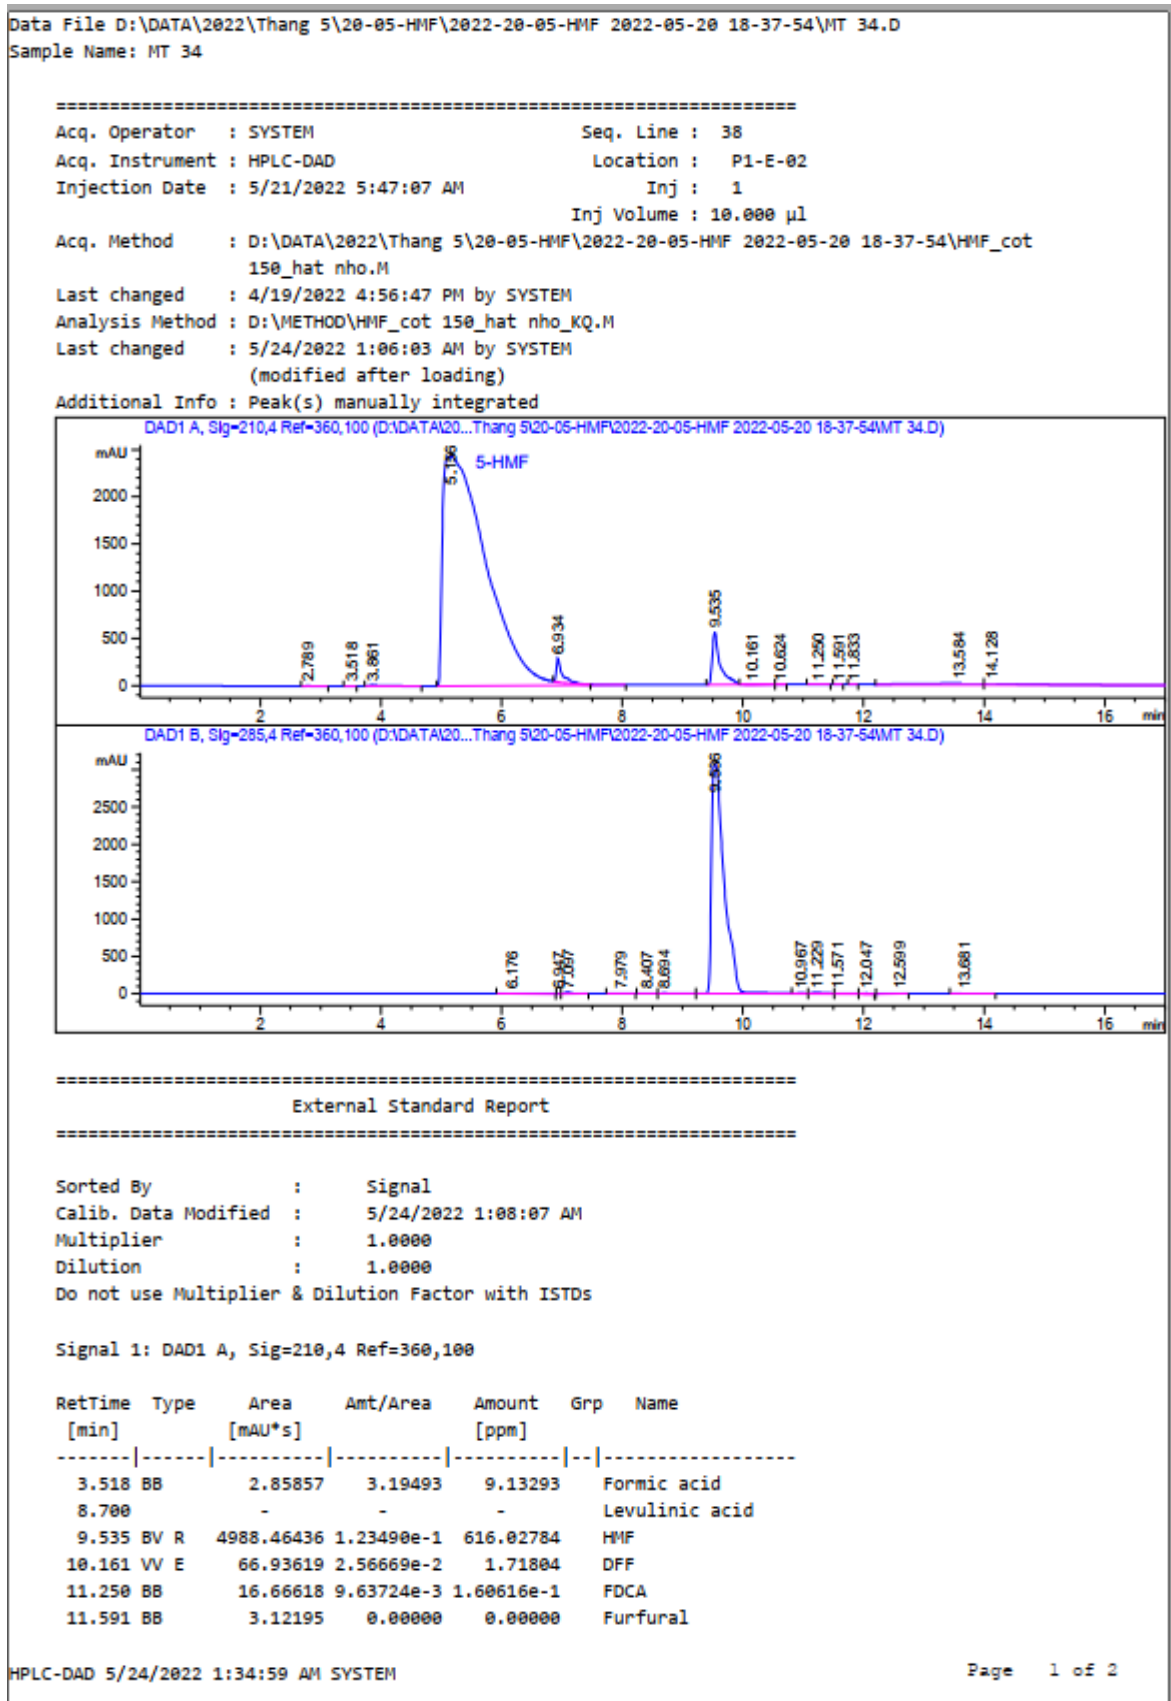

**Figure S4-20:** HPLC chromatography of 5-HMF in investigating catalytic performance. Reaction conditions: Fructose (1mmol), DMSO, for 13 hours at 120 °C.

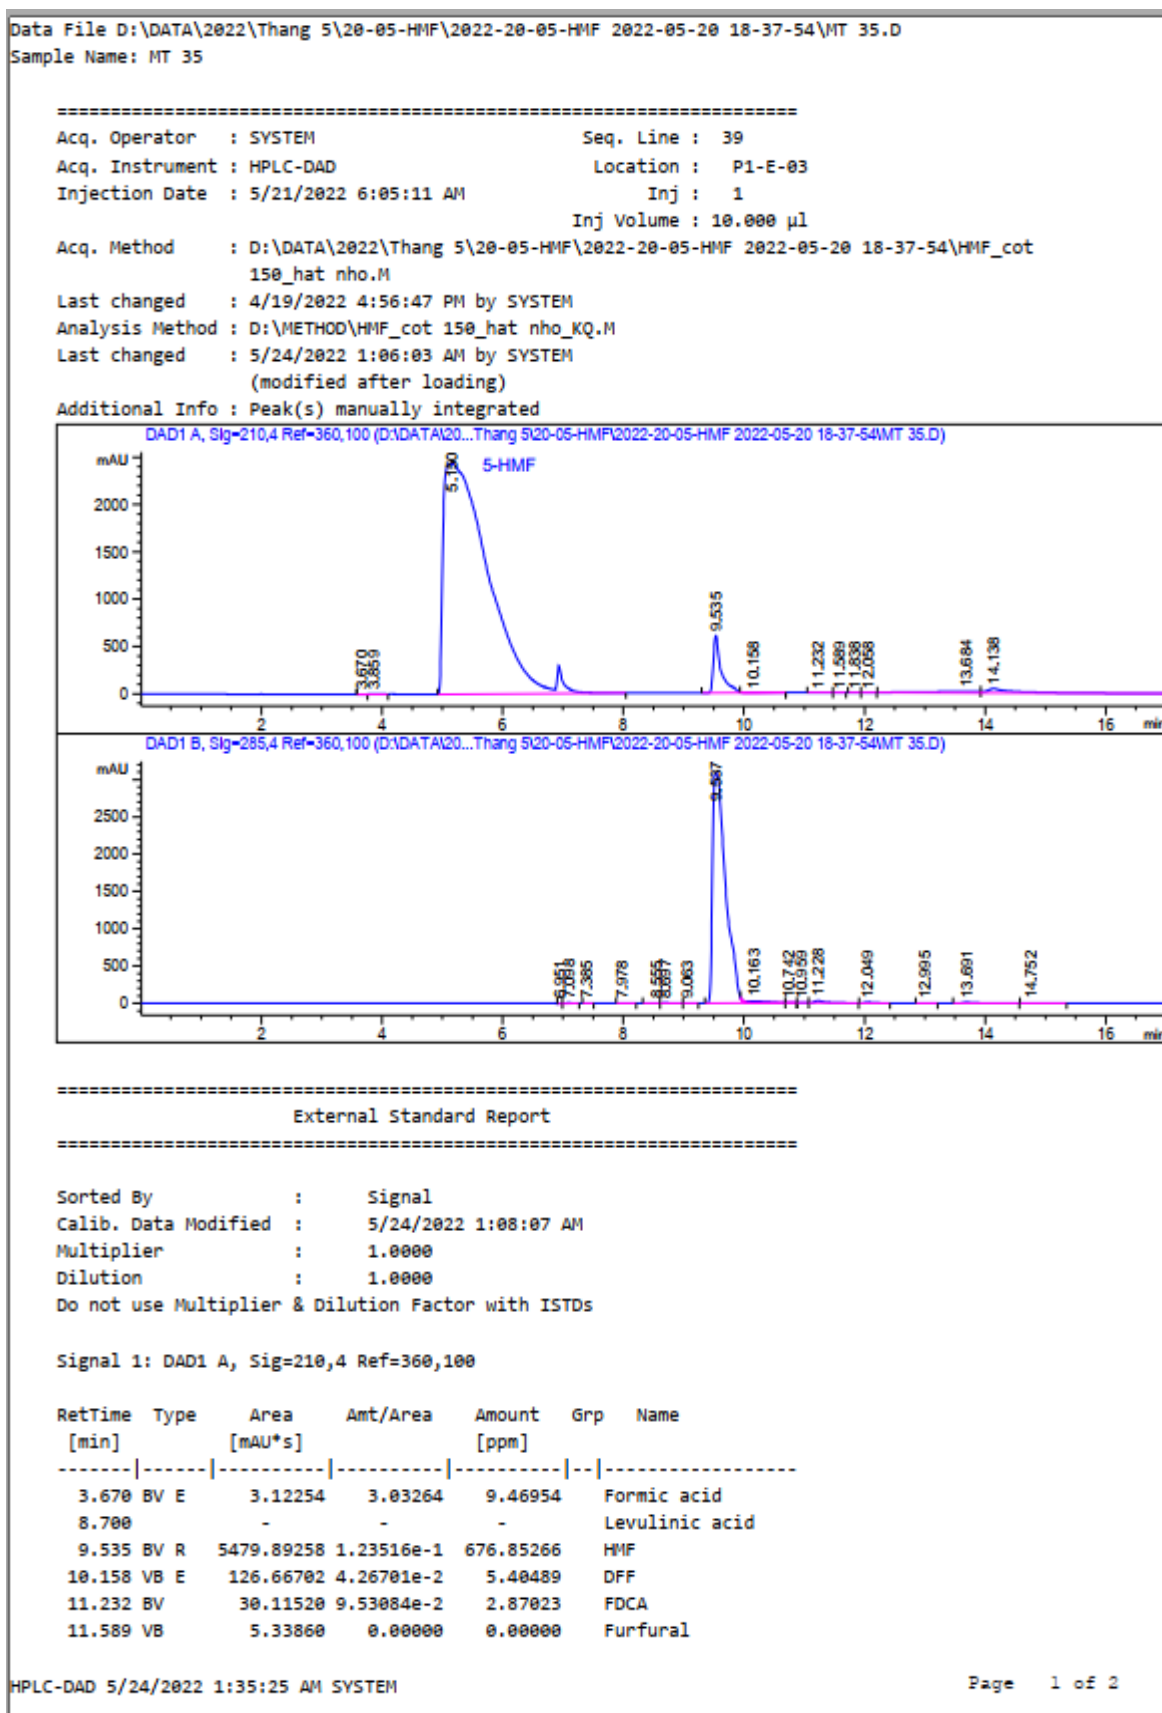

**Figure S4-21:** HPLC chromatography of 5-HMF in investigating catalytic performance. Reaction conditions: Fructose (1mmol), DMSO, for 30 minutes at 120 °C.

Data File D:\DATA\2022\Thang 5\25-05-HMF\2022-25-05-HMF 2022-05-25 18-45-04\MT 36.D  
 Sample Name: MT 36

```

=====
Acq. Operator   : SYSTEM                      Seq. Line : 18
Acq. Instrument : HPLC-DAD                   Location  : P1-C-04
Injection Date  : 5/25/2022 11:54:22 PM      Inj       : 1
                                                Inj Volume: 10.000 µl
Acq. Method     : D:\DATA\2022\Thang 5\25-05-HMF\2022-25-05-HMF 2022-05-25 18-45-04\HMF_cot
                                                150_hat_nho.M
Last changed    : 4/19/2022 4:56:47 PM by SYSTEM
Analysis Method : D:\METHOD\HMF_cot 150_hat_nho_KQ.M
Last changed    : 5/26/2022 6:42:39 AM by SYSTEM
                (modified after loading)
Additional Info : Peak(s) manually integrated
  
```

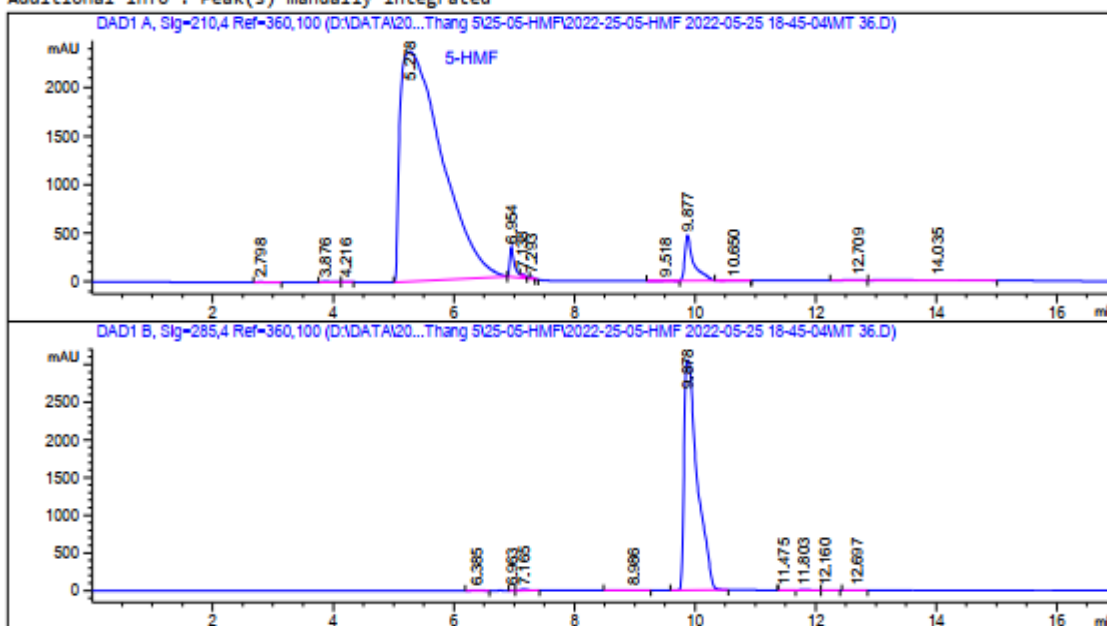

External Standard Report

```

Sorted By      : Signal
Calib. Data Modified : 5/26/2022 6:43:26 AM
Multiplier     : 1.0000
Dilution       : 1.0000
Do not use Multiplier & Dilution Factor with ISTDs
  
```

Signal 1: DAD1 A, Sig=210,4 Ref=360,100

| RetTime [min] | Type | Area [mAU*s] | Amt/Area   | Amount [ppm] | Grp | Name           |
|---------------|------|--------------|------------|--------------|-----|----------------|
| 3.600         | -    | -            | -          | -            | -   | Formic acid    |
| 8.700         | -    | -            | -          | -            | -   | Levulinic acid |
| 9.877         | VV R | 4823.13281   | 1.23481e-1 | 595.56450    | -   | HMF            |
| 10.300        | -    | -            | -          | -            | -   | DFP            |
| 11.000        | -    | -            | -          | -            | -   | FDCA           |
| 11.600        | -    | -            | -          | -            | -   | Furfural       |



**Figure S4-22:** HPLC chromatography of 5-HMF in investigating catalytic performance. Reaction conditions: Fructose (1mmol), DMSO, for 1 hour at 120 °C.

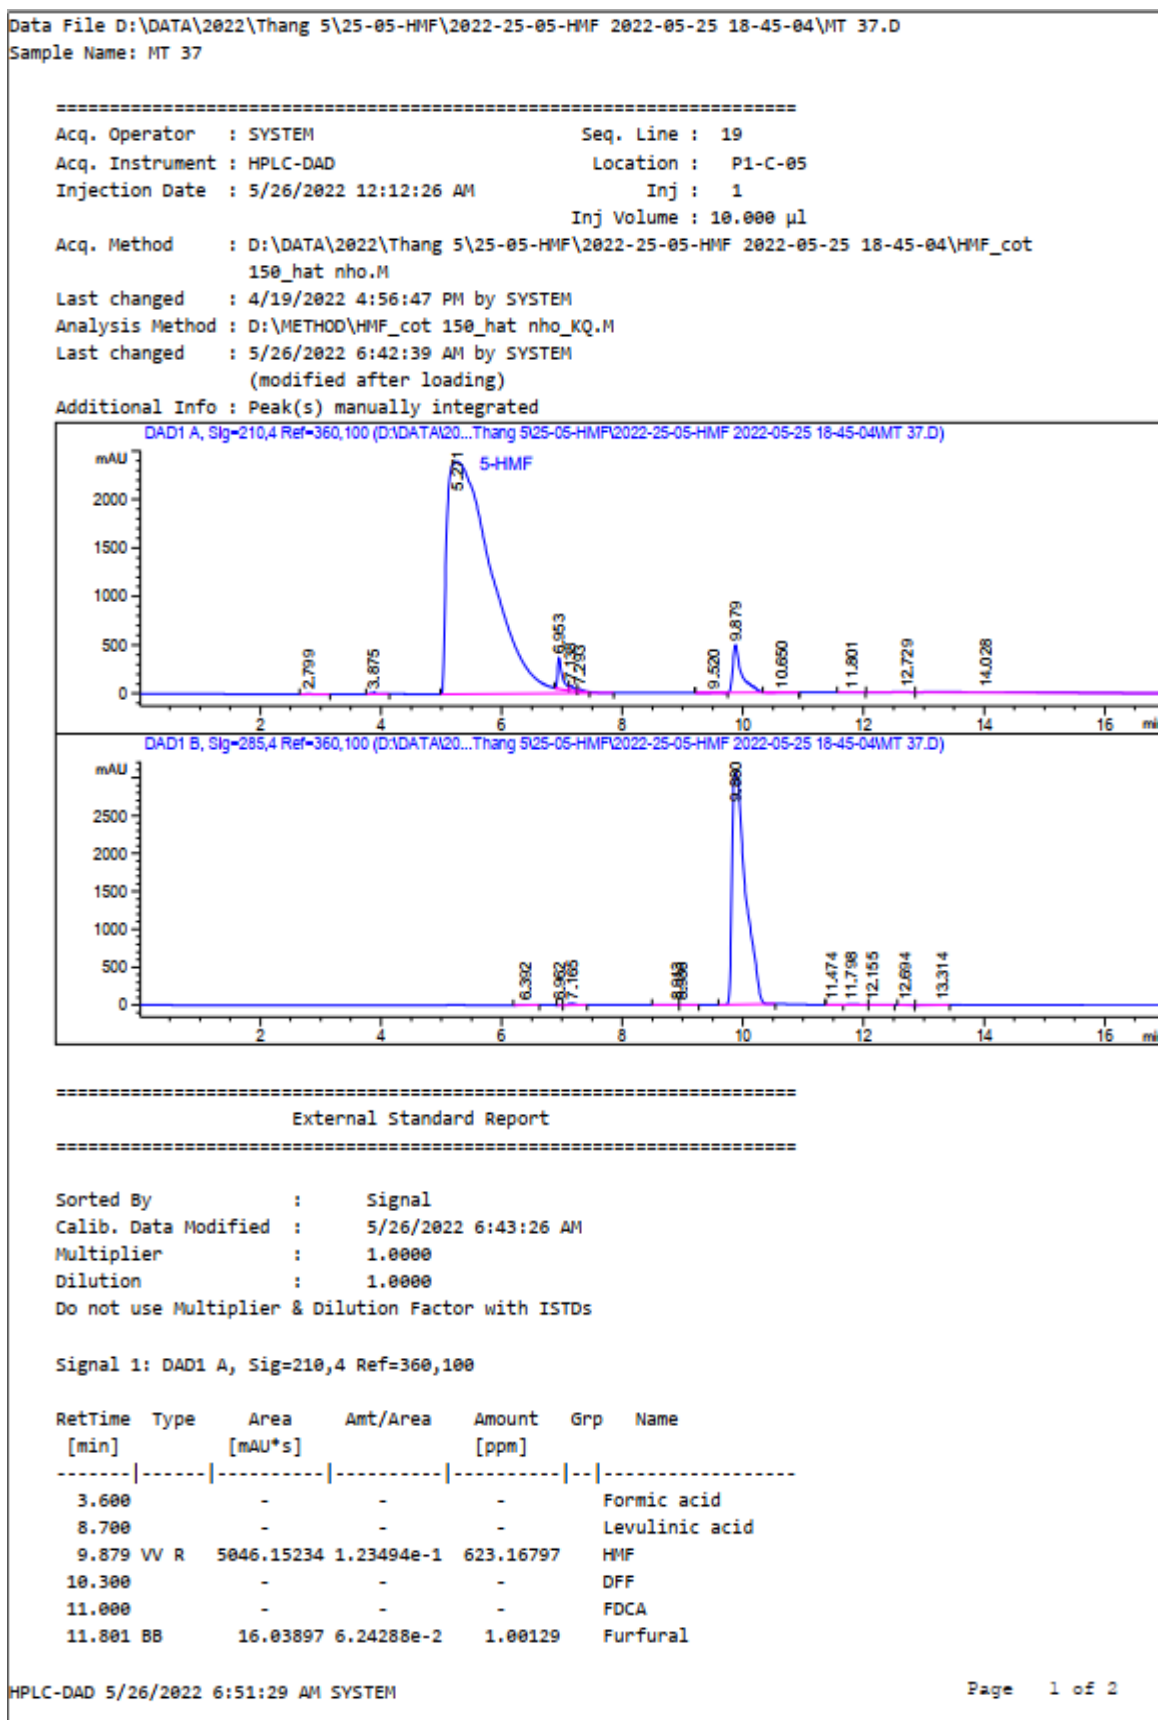



**Figure S4-23:** HPLC chromatography of 5-HMF in investigating catalytic performance. Reaction conditions: Fructose (1mmol), DMSO, for 3 hours at 120 °C.

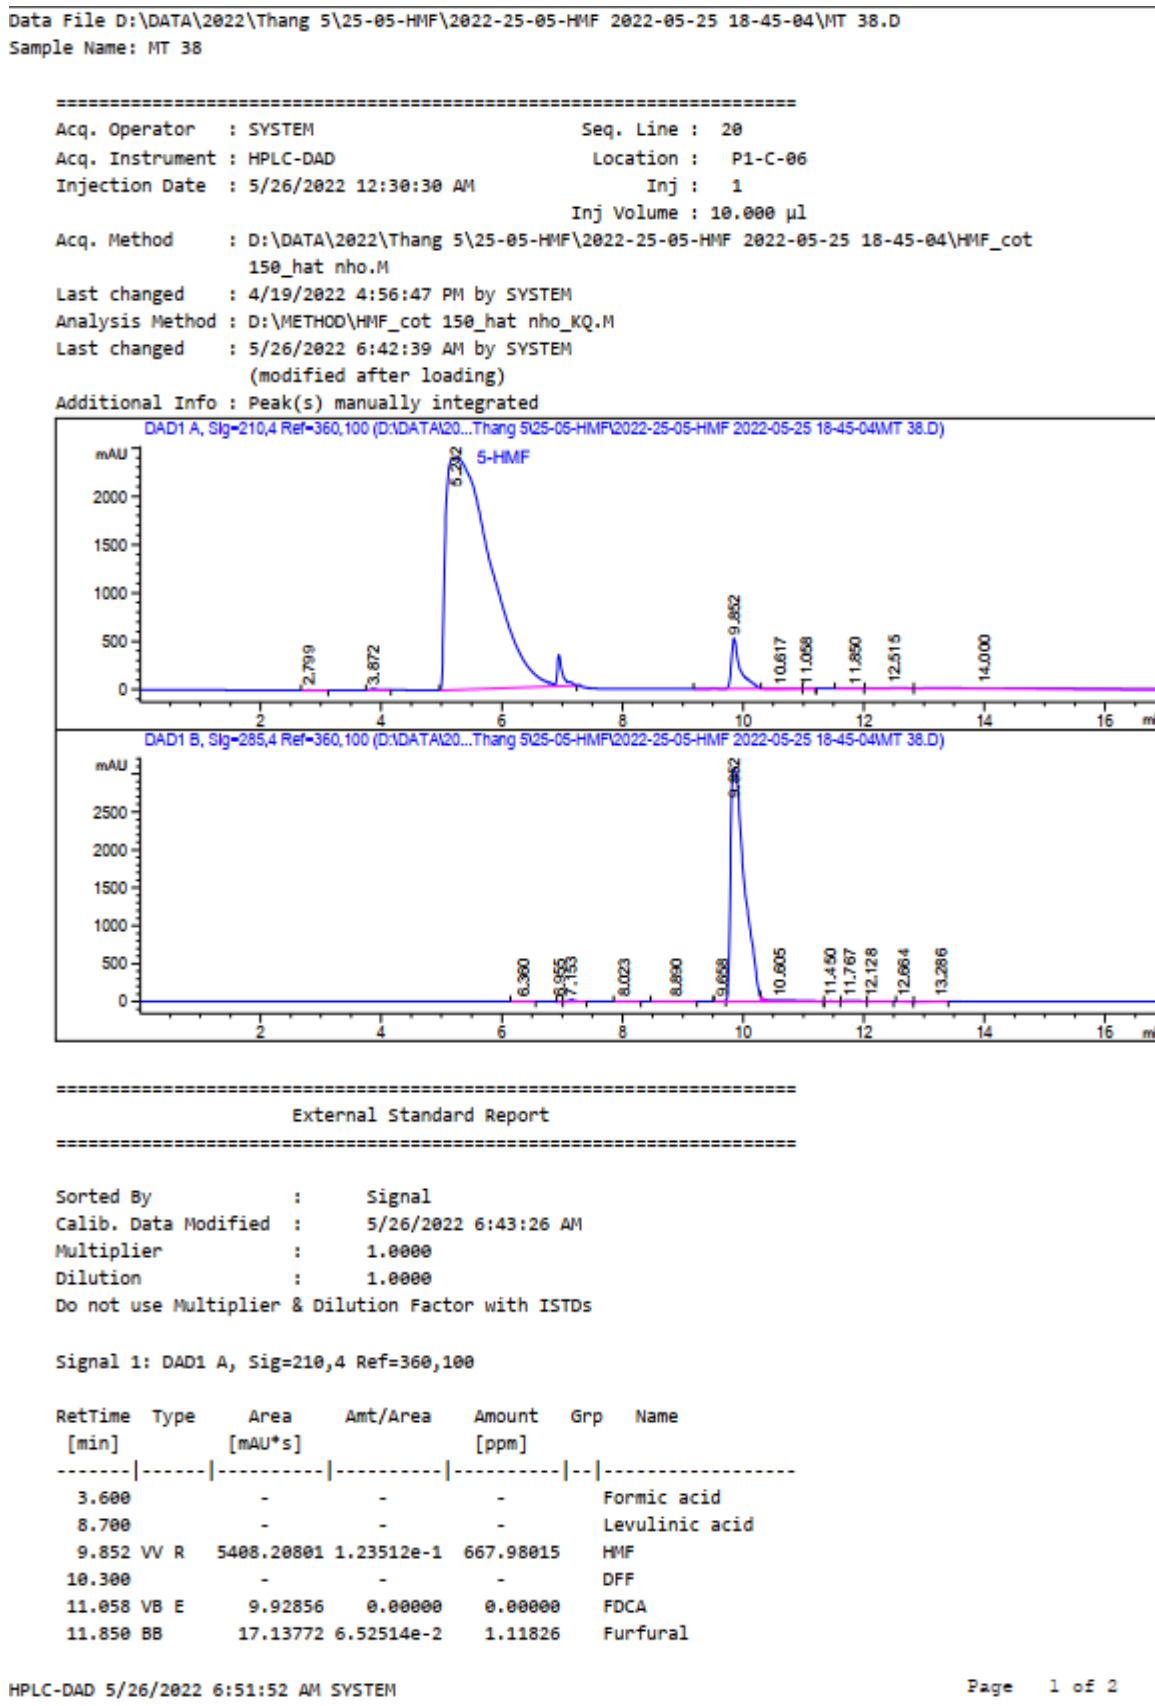

**Figure S4-24:** HPLC chromatography of 5-HMF in investigating catalytic performance. Reaction conditions: Fructose (1mmol), DMSO, for 6 hours at 120 °C.

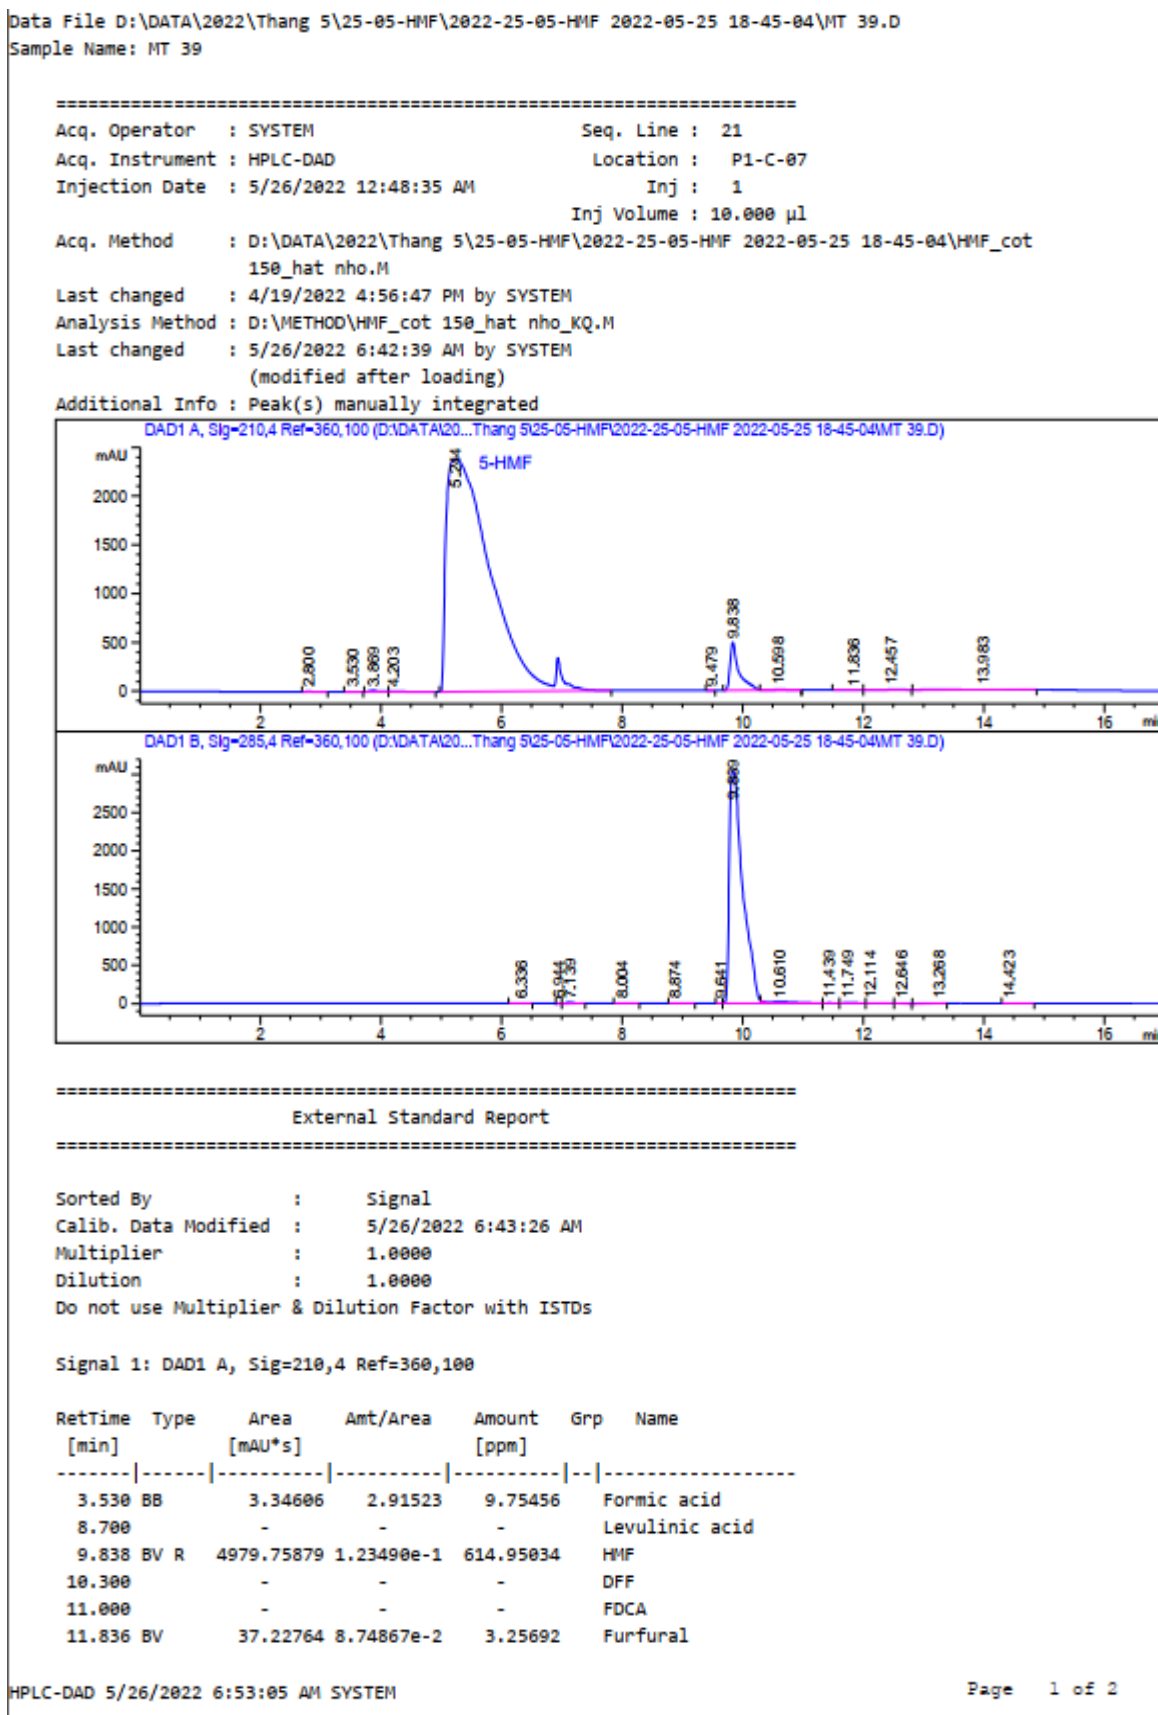

**Figure S4-25:** HPLC chromatography of 5-HMF in investigating catalytic performance. Reaction conditions: Fructose (1mmol), DMSO, for 8 hours at 120 °C.

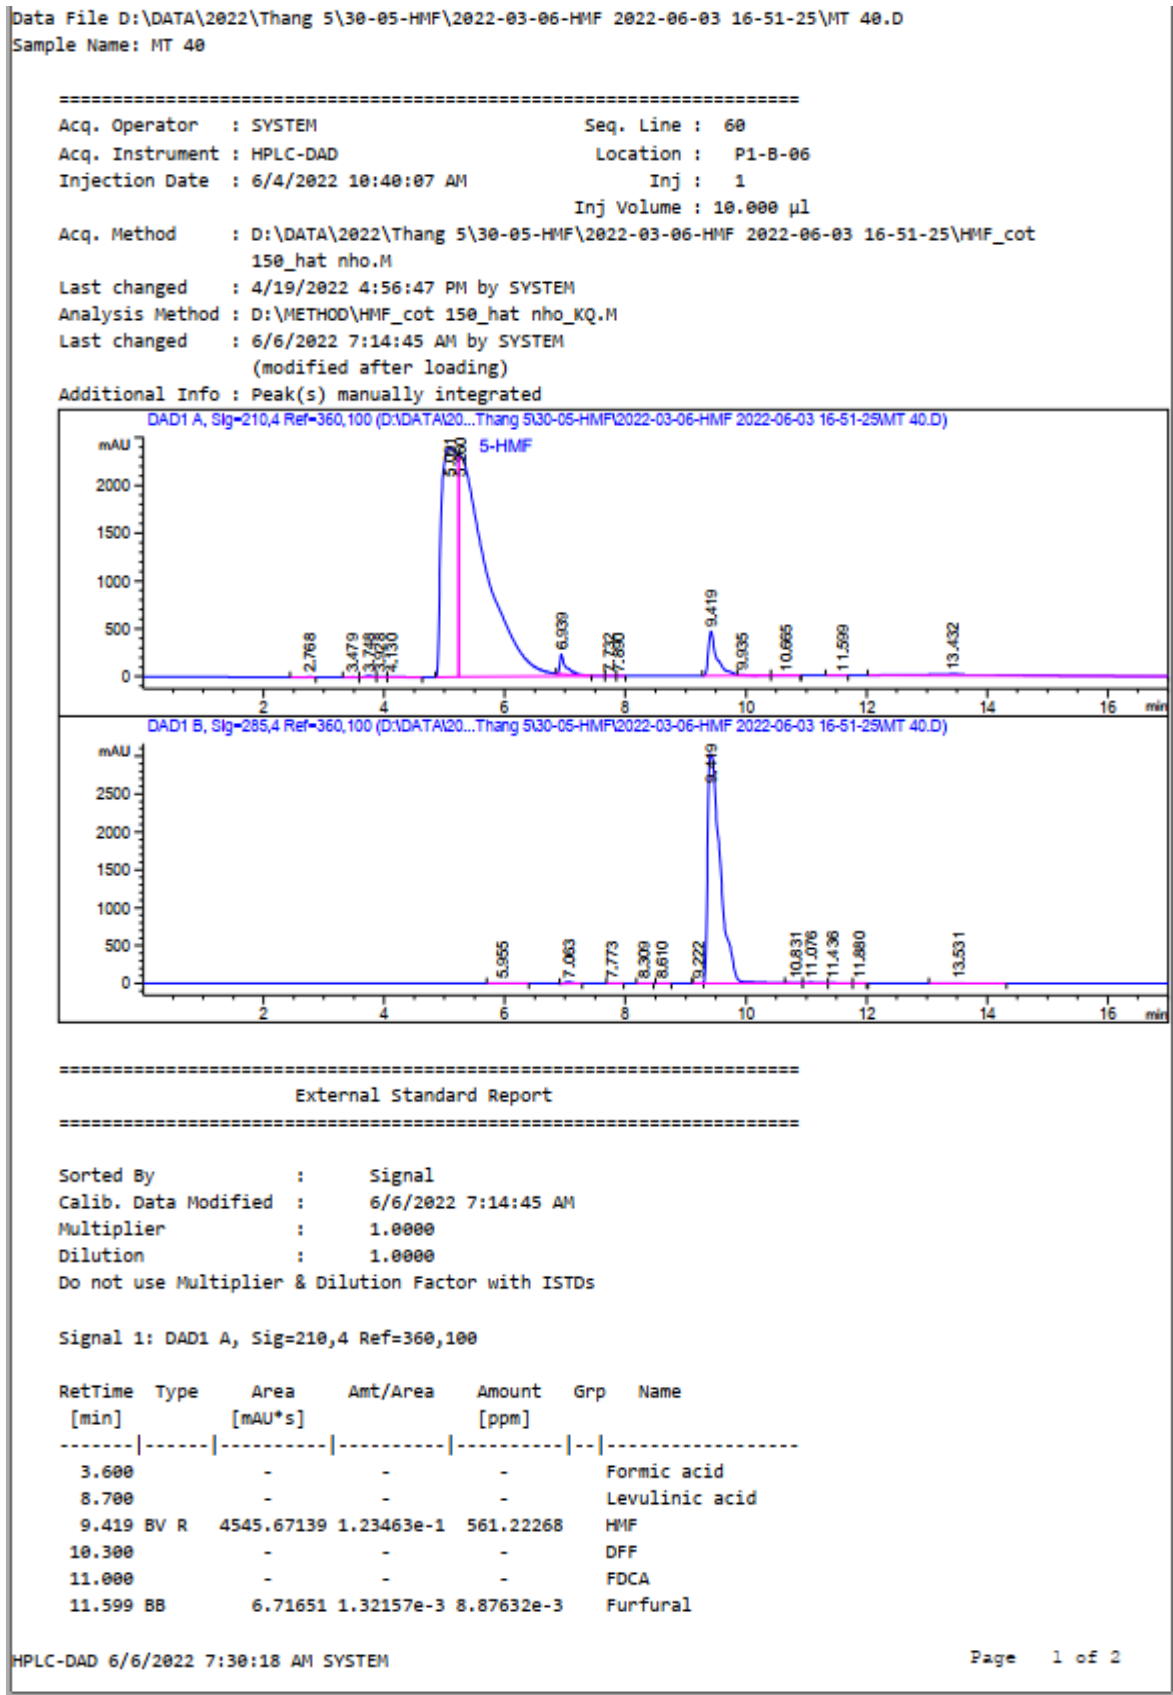

**Figure S4-26:** HPLC chromatography of 5-HMF in investigating catalytic performance. Reaction conditions: Fructose (1mmol), DMSO, for 9 hours at 120 °C.

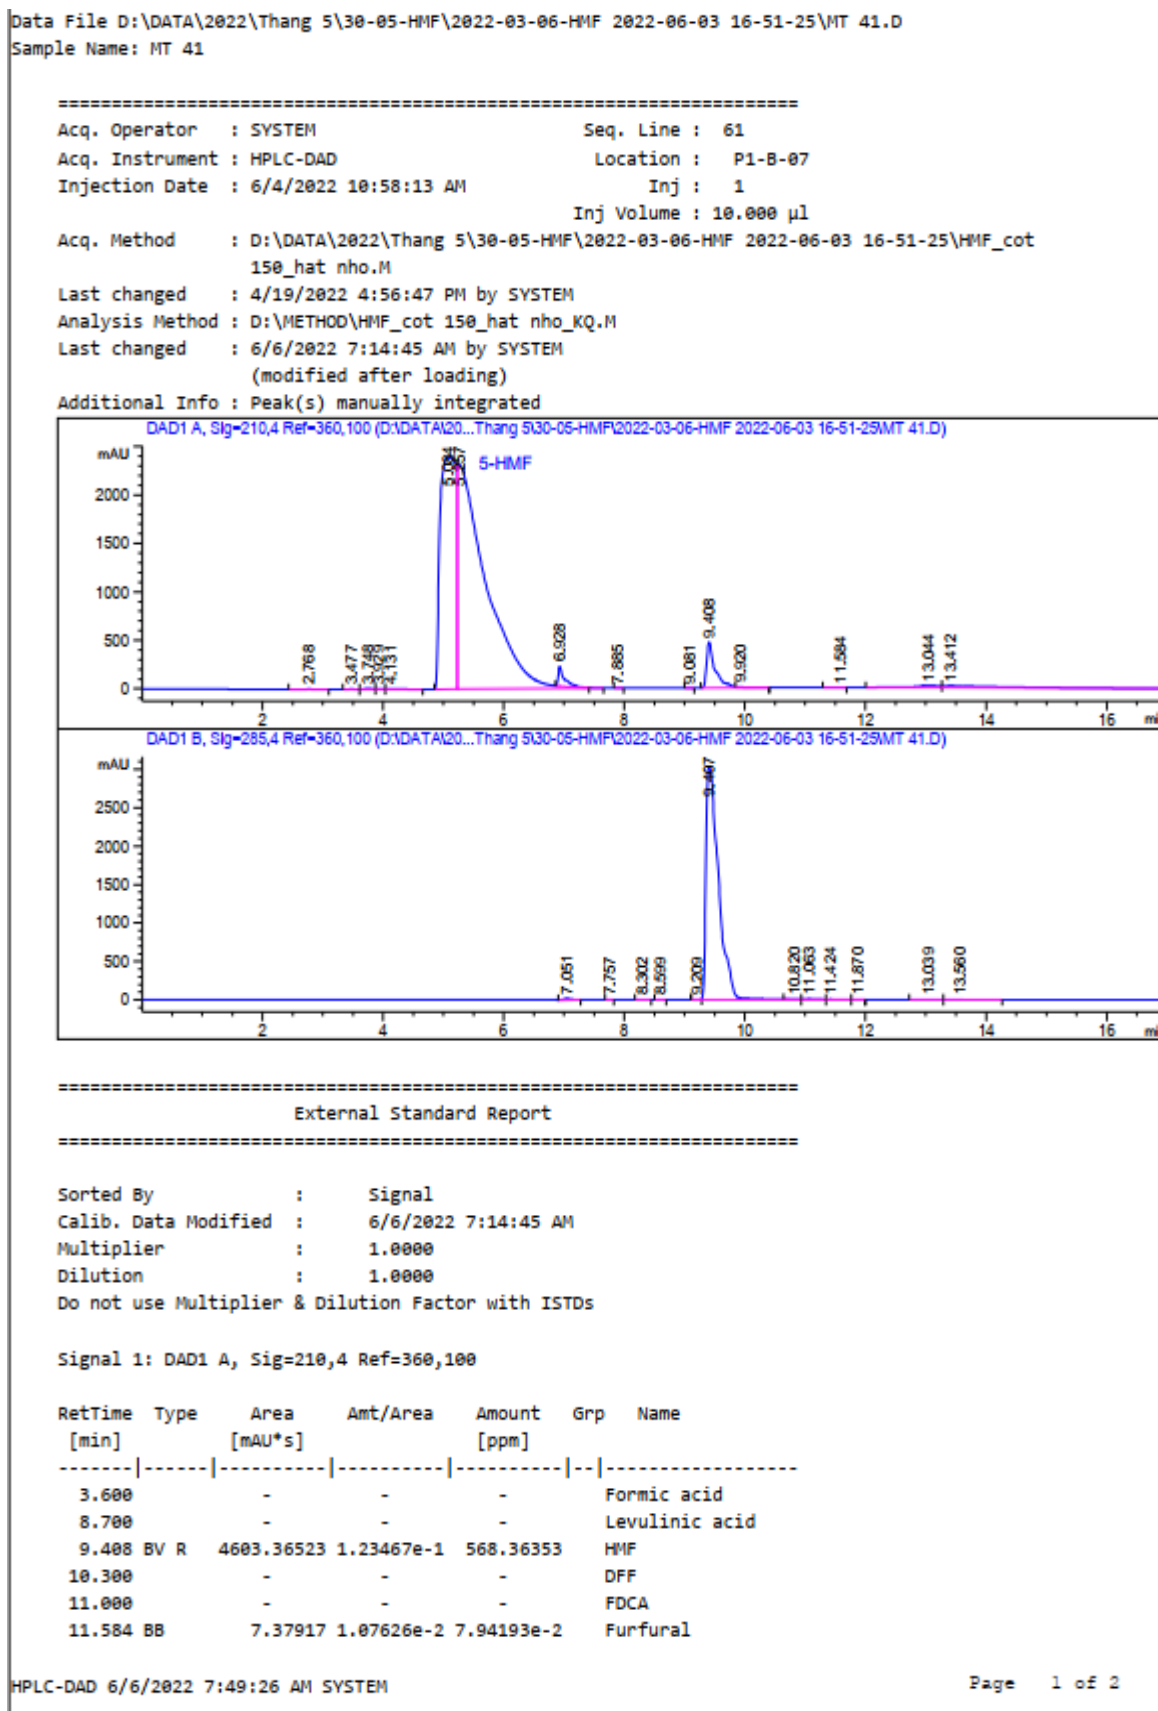

**Figure S4-27:** HPLC chromatography of 5-HMF in investigating catalytic performance. Reaction conditions: Fructose (1mmol), DMSO, for 10 hours at 120 °C.

Data File D:\DATA\2022\Thang 5\30-05-HMF\2022-03-06-HMF 2022-06-03 16-51-25\MT 42.D  
 Sample Name: MT 42

```

=====
Acq. Operator   : SYSTEM                      Seq. Line :   62
Acq. Instrument : HPLC-DAD                    Location  : P1-B-08
Injection Date  : 6/4/2022 11:16:19 AM       Inj       :    1
                                           Inj Volume: 10.000 µl
Acq. Method     : D:\DATA\2022\Thang 5\30-05-HMF\2022-03-06-HMF 2022-06-03 16-51-25\HMF_cot
150_hat_nho.M
Last changed    : 4/19/2022 4:56:47 PM by SYSTEM
Analysis Method : D:\METHOD\HMF_cot_150_hat_nho_KQ.M
Last changed    : 6/6/2022 7:14:45 AM by SYSTEM
                (modified after loading)
Additional Info  : Peak(s) manually integrated
  
```

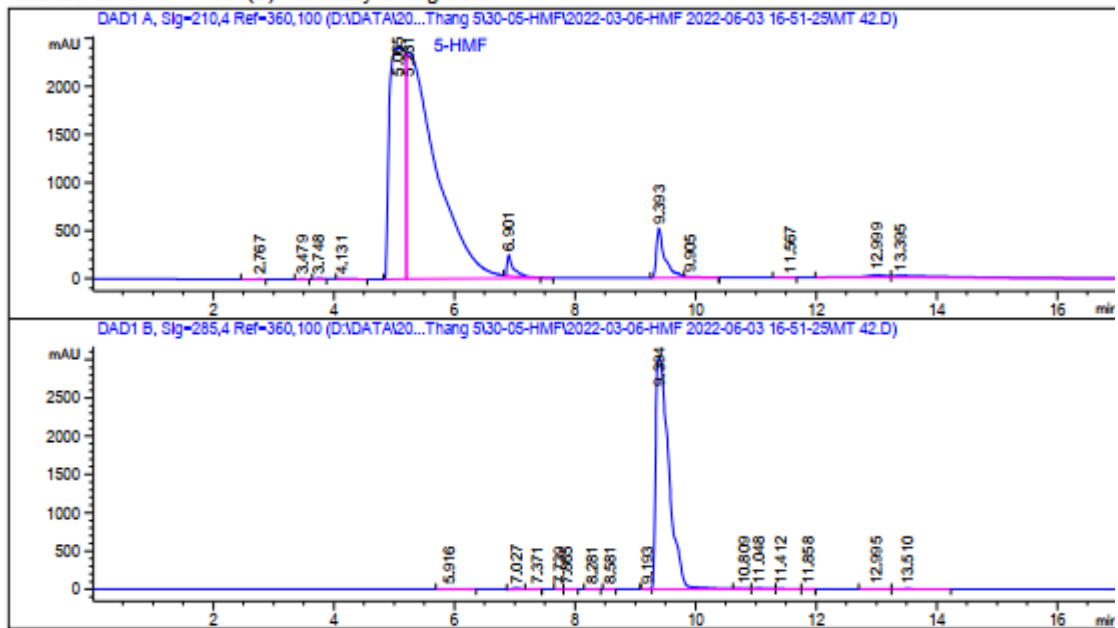

External Standard Report

```

Sorted By      : Signal
Calib. Data Modified : 6/6/2022 7:14:45 AM
Multiplier     : 1.0000
Dilution       : 1.0000
Do not use Multiplier & Dilution Factor with ISTDs
  
```

Signal 1: DAD1 A, Sig=210,4 Ref=360,100

| RetTime [min] | Type | Area [mAU*s] | Amt/Area   | Amount [ppm] | Grp | Name           |
|---------------|------|--------------|------------|--------------|-----|----------------|
| 3.600         | -    | -            | -          | -            | -   | Formic acid    |
| 8.700         | -    | -            | -          | -            | -   | Levulinic acid |
| 9.393         | BV R | 4995.88672   | 1.23491e-1 | 616.94652    | -   | HMF            |
| 10.300        | -    | -            | -          | -            | -   | DFF            |
| 11.000        | -    | -            | -          | -            | -   | FDCA           |
| 11.567        | BB   | 10.03618     | 3.60964e-2 | 3.62270e-1   | -   | Furfural       |

**Figure S4-28:** HPLC chromatography of 5-HMF in investigating catalytic performance. Reaction conditions: Fructose (1mmol), DMSO, for 11 hours at 120 °C.

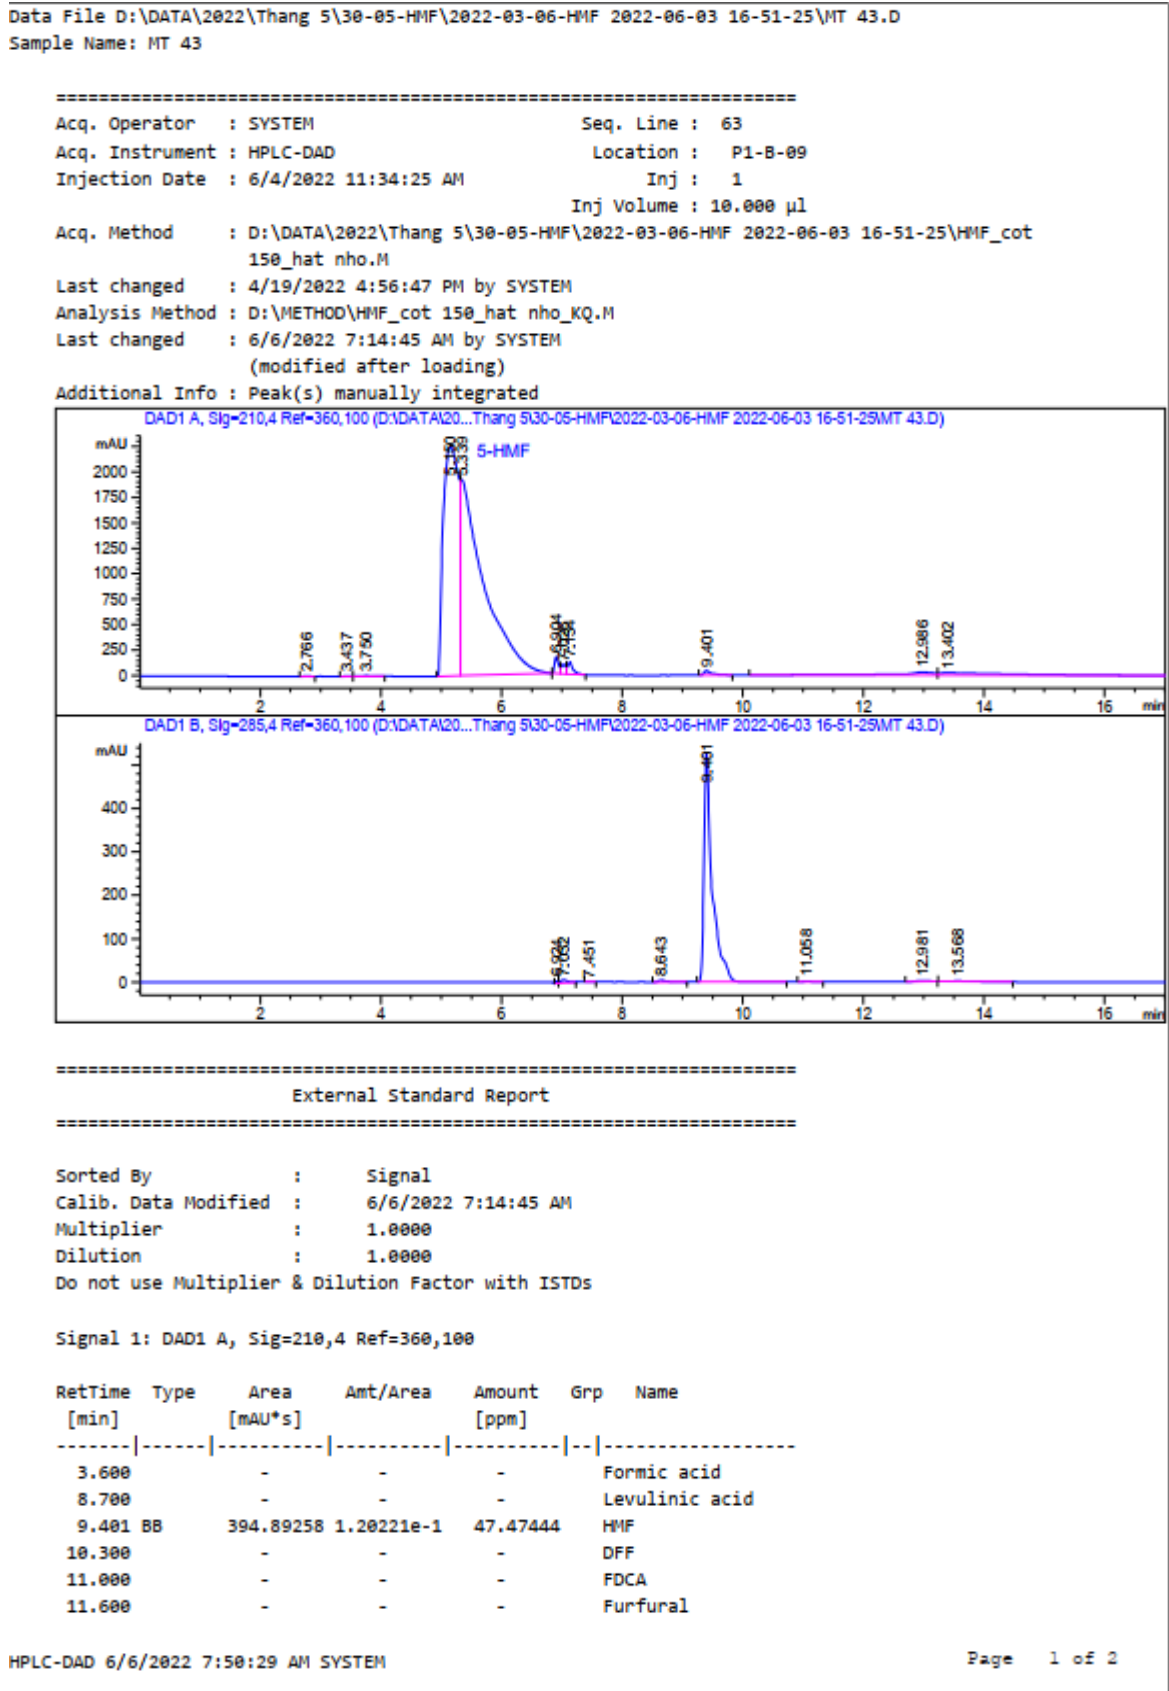

**Figure S4-29:** HPLC chromatography of 5-HMF in investigating catalytic performance. Reaction conditions: Fructose (1mmol), DMSO, for 12 hours at 120 °C.

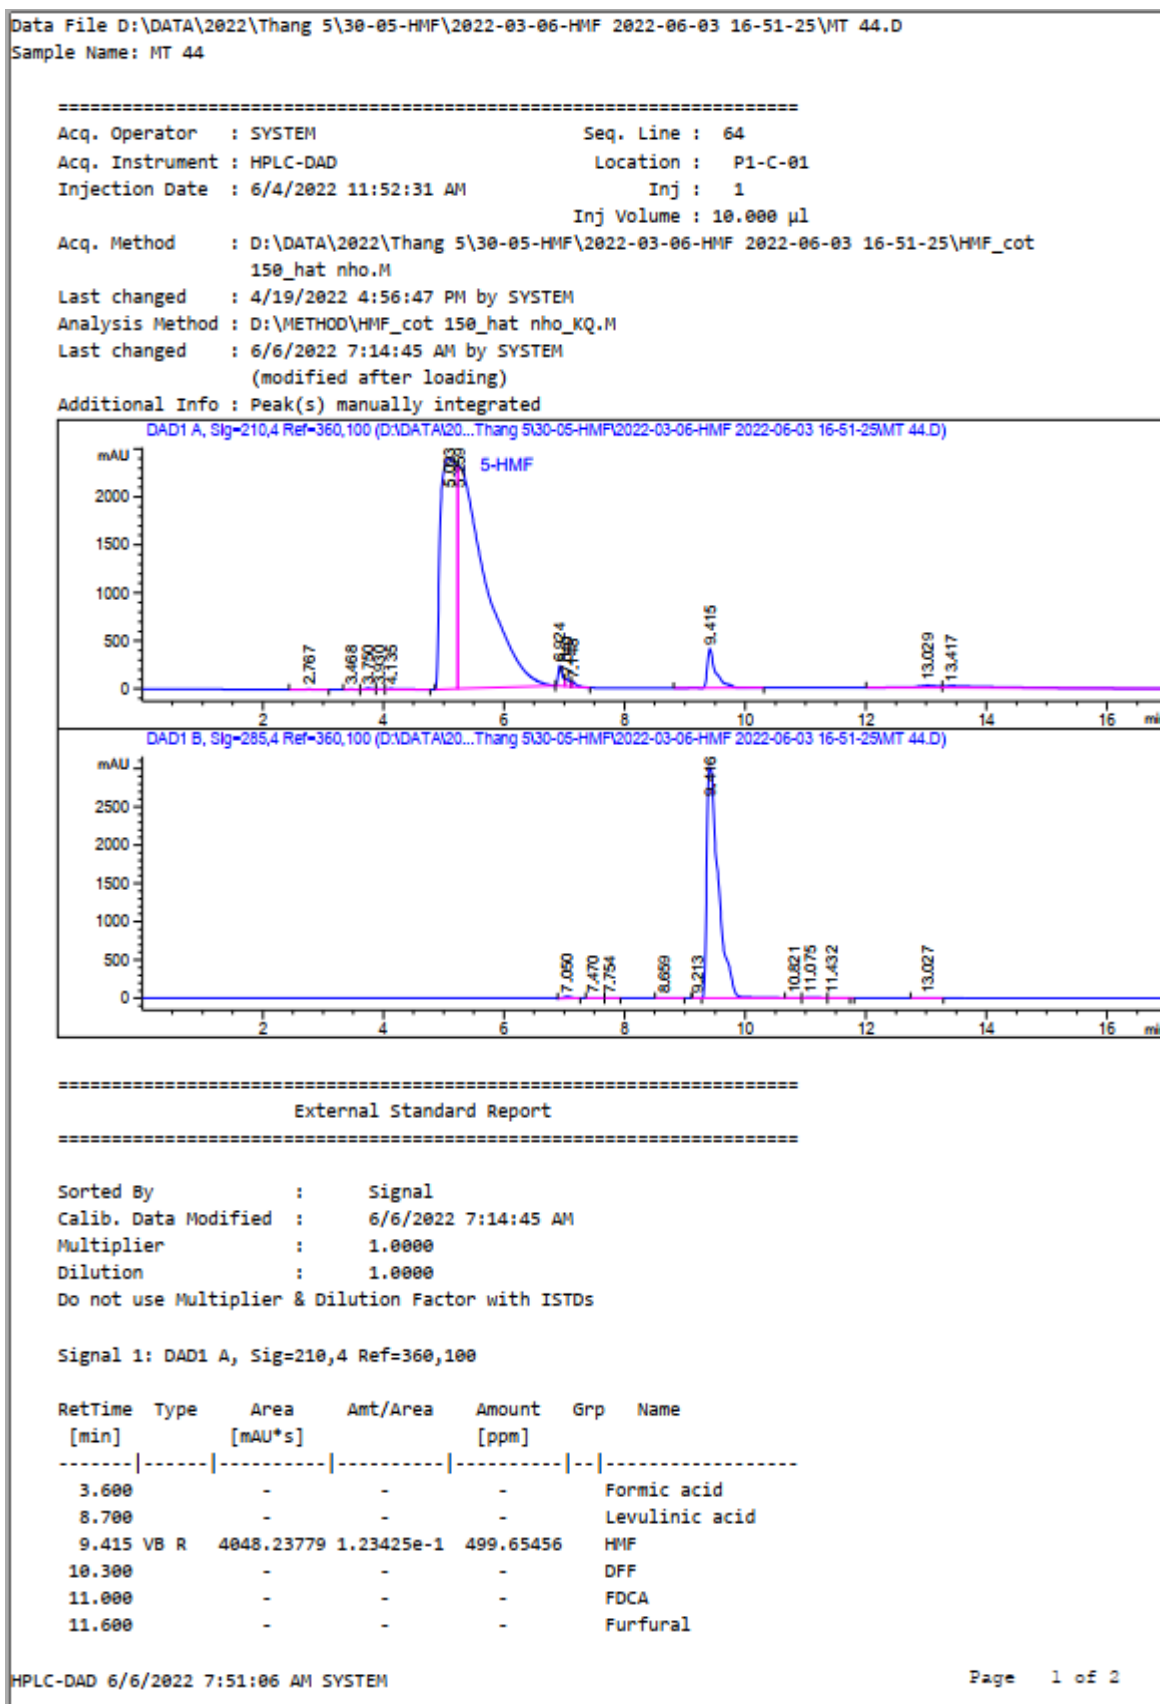



**Figure S4-30:** HPLC chromatography of 5-HMF in investigating catalytic performance. Reaction conditions: Fructose (1mmol), DMSO, for 13 hours at 120 °C.

Data File D:\DATA\2022\Thang 5\30-05-HMF\2022-03-06-HMF 2022-06-03 16-51-25\MT 45.D  
 Sample Name: MT 45

```

=====
Acq. Operator   : SYSTEM                      Seq. Line : 65
Acq. Instrument : HPLC-DAD                   Location  : P1-C-02
Injection Date  : 6/4/2022 12:10:35 PM      Inj       : 1
                                           Inj Volume: 10.000 µl

Acq. Method     : D:\DATA\2022\Thang 5\30-05-HMF\2022-03-06-HMF 2022-06-03 16-51-25\HMF_cot
                  150_hat_nho.M
Last changed    : 4/19/2022 4:56:47 PM by SYSTEM
Analysis Method : D:\METHOD\HMF_cot_150_hat_nho_KQ.M
Last changed    : 6/6/2022 7:14:45 AM by SYSTEM
                  (modified after loading)
Additional Info  : Peak(s) manually integrated
  
```

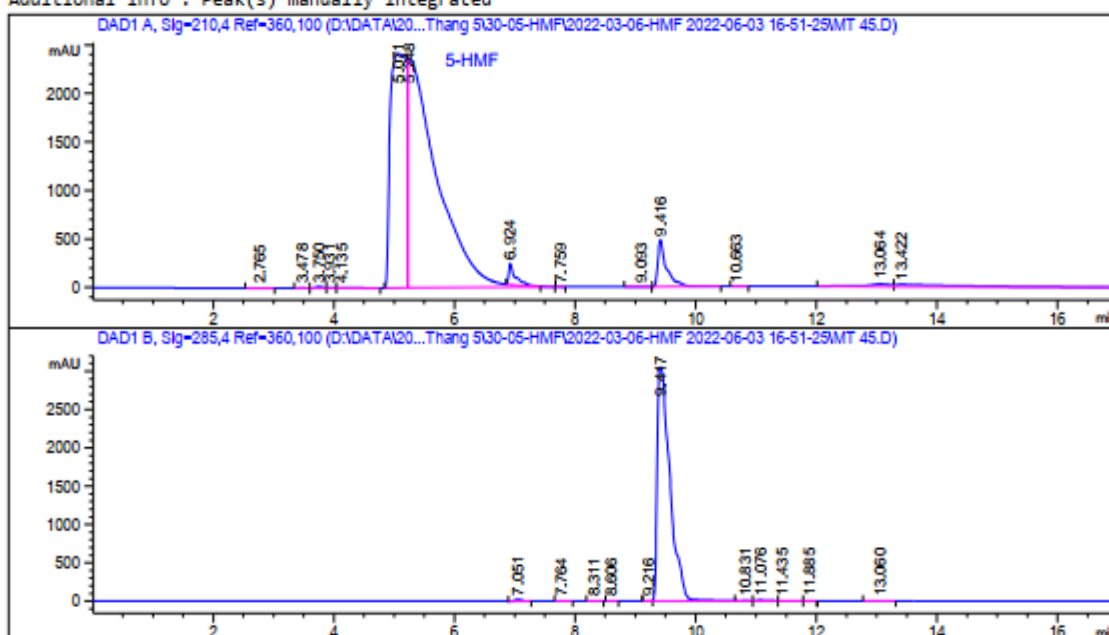

External Standard Report

```

Sorted By      : Signal
Calib. Data Modified : 6/6/2022 7:14:45 AM
Multiplier     : 1.0000
Dilution      : 1.0000
Do not use Multiplier & Dilution Factor with ISTDs
  
```

Signal 1: DAD1 A, Sig=210,4 Ref=360,100

| RetTime [min] | Type | Area [mAU*s] | Amt/Area   | Amount [ppm] | Grp | Name           |
|---------------|------|--------------|------------|--------------|-----|----------------|
| 3.600         | -    | -            | -          | -            | -   | Formic acid    |
| 8.700         | -    | -            | -          | -            | -   | Levulinic acid |
| 9.416         | BB   | 4766.39893   | 1.23477e-1 | 588.54246    | -   | HMF            |
| 10.300        | -    | -            | -          | -            | -   | DFF            |
| 11.000        | -    | -            | -          | -            | -   | FDCA           |
| 11.600        | -    | -            | -          | -            | -   | Furfural       |



**Figure S4-31:** HPLC chromatography of 5-HMF in investigating catalytic performance. Reaction conditions: Fructose (1mmol), DMSO, for 12 hours at room temperature.

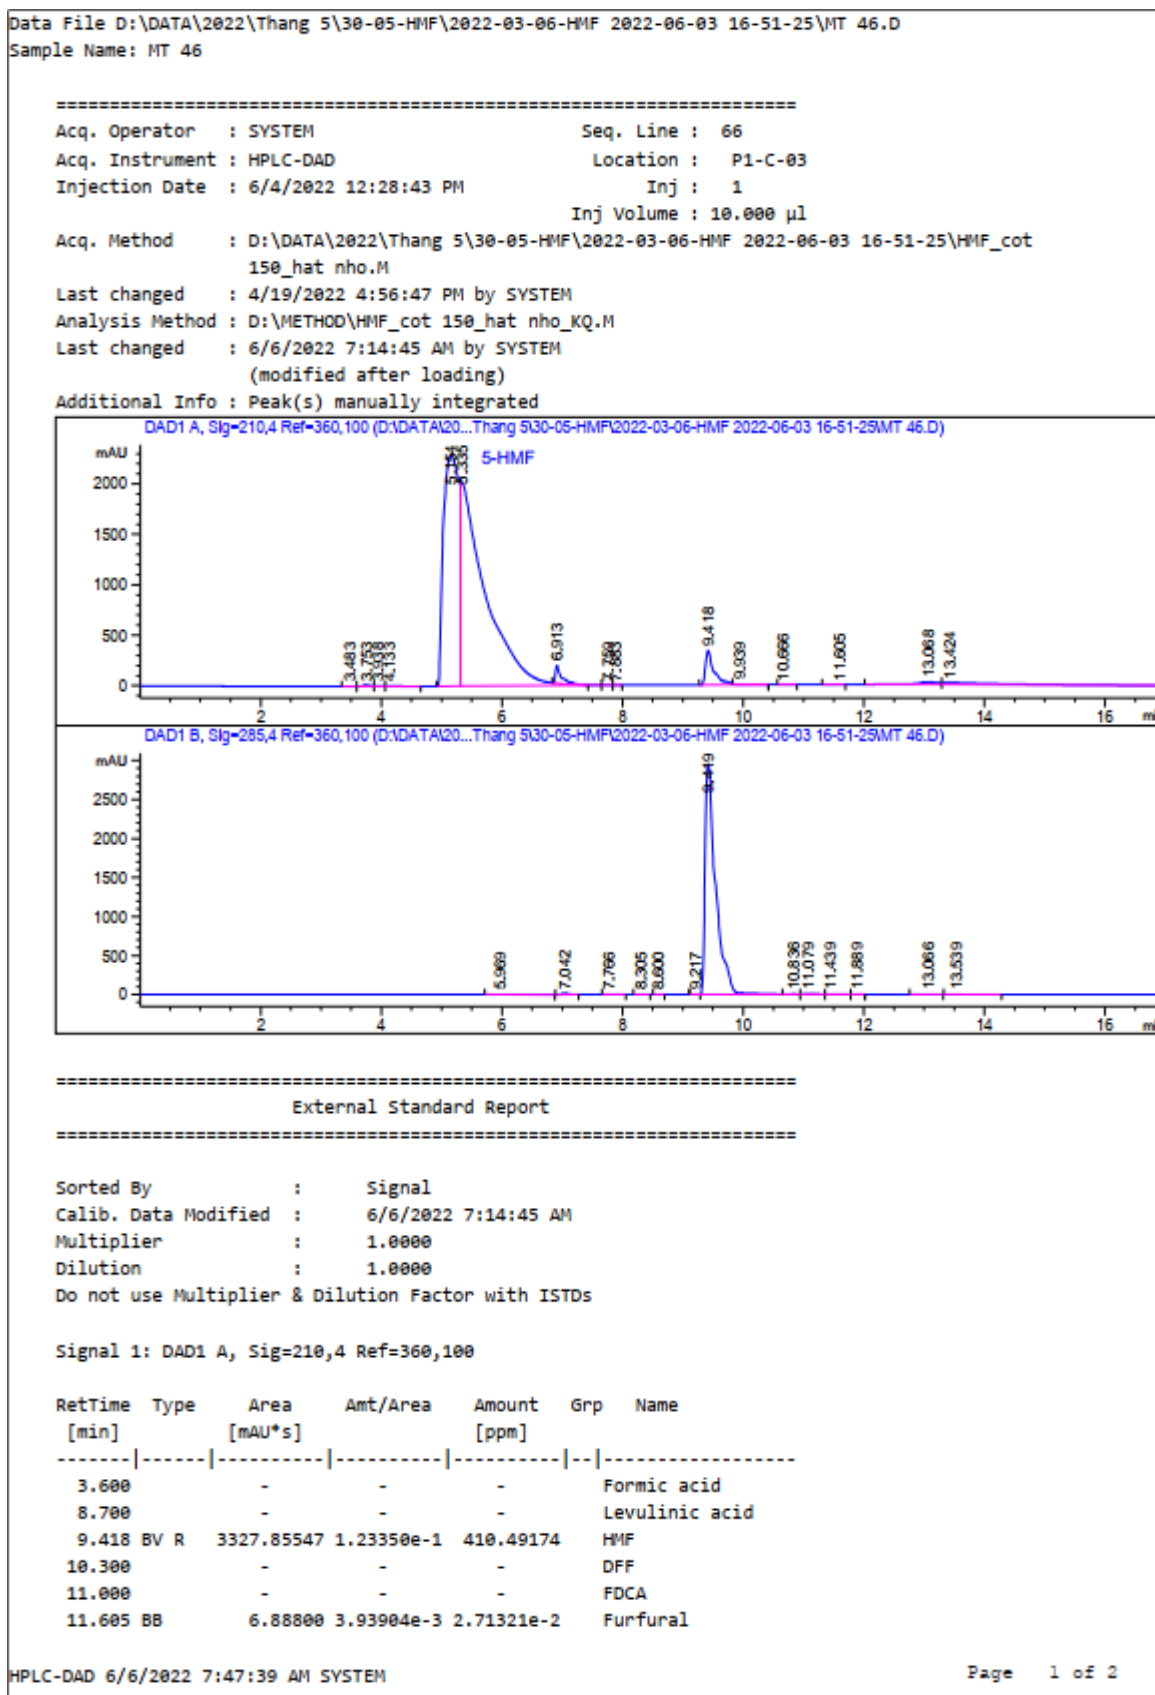

**Figure S4-32:** HPLC chromatography of 5-HMF in investigating catalytic performance. Reaction conditions: Fructose (1mmol), DMSO, for 12 hours at 40 °C.

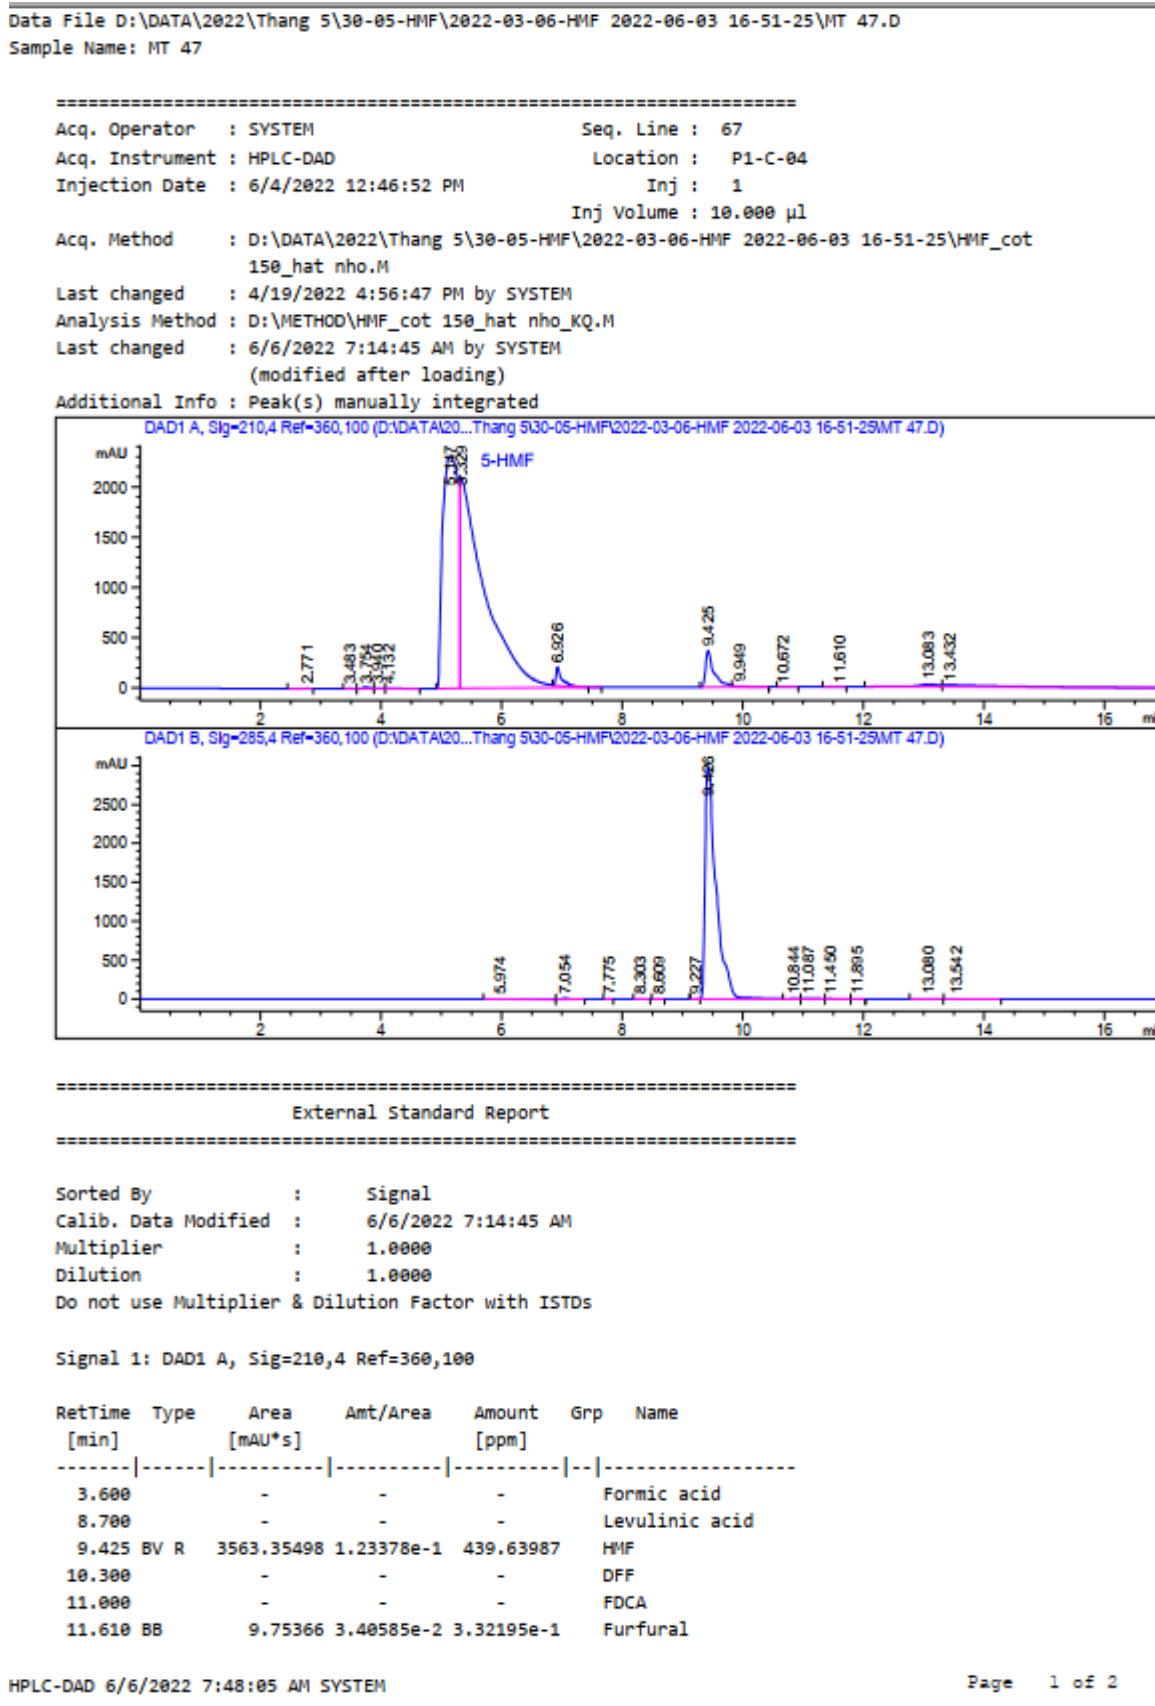

**Figure S4-33:** HPLC chromatography of 5-HMF in investigating catalytic performance. Reaction conditions: Fructose (1mmol), DMSO, for 12 hours at 60 °C.

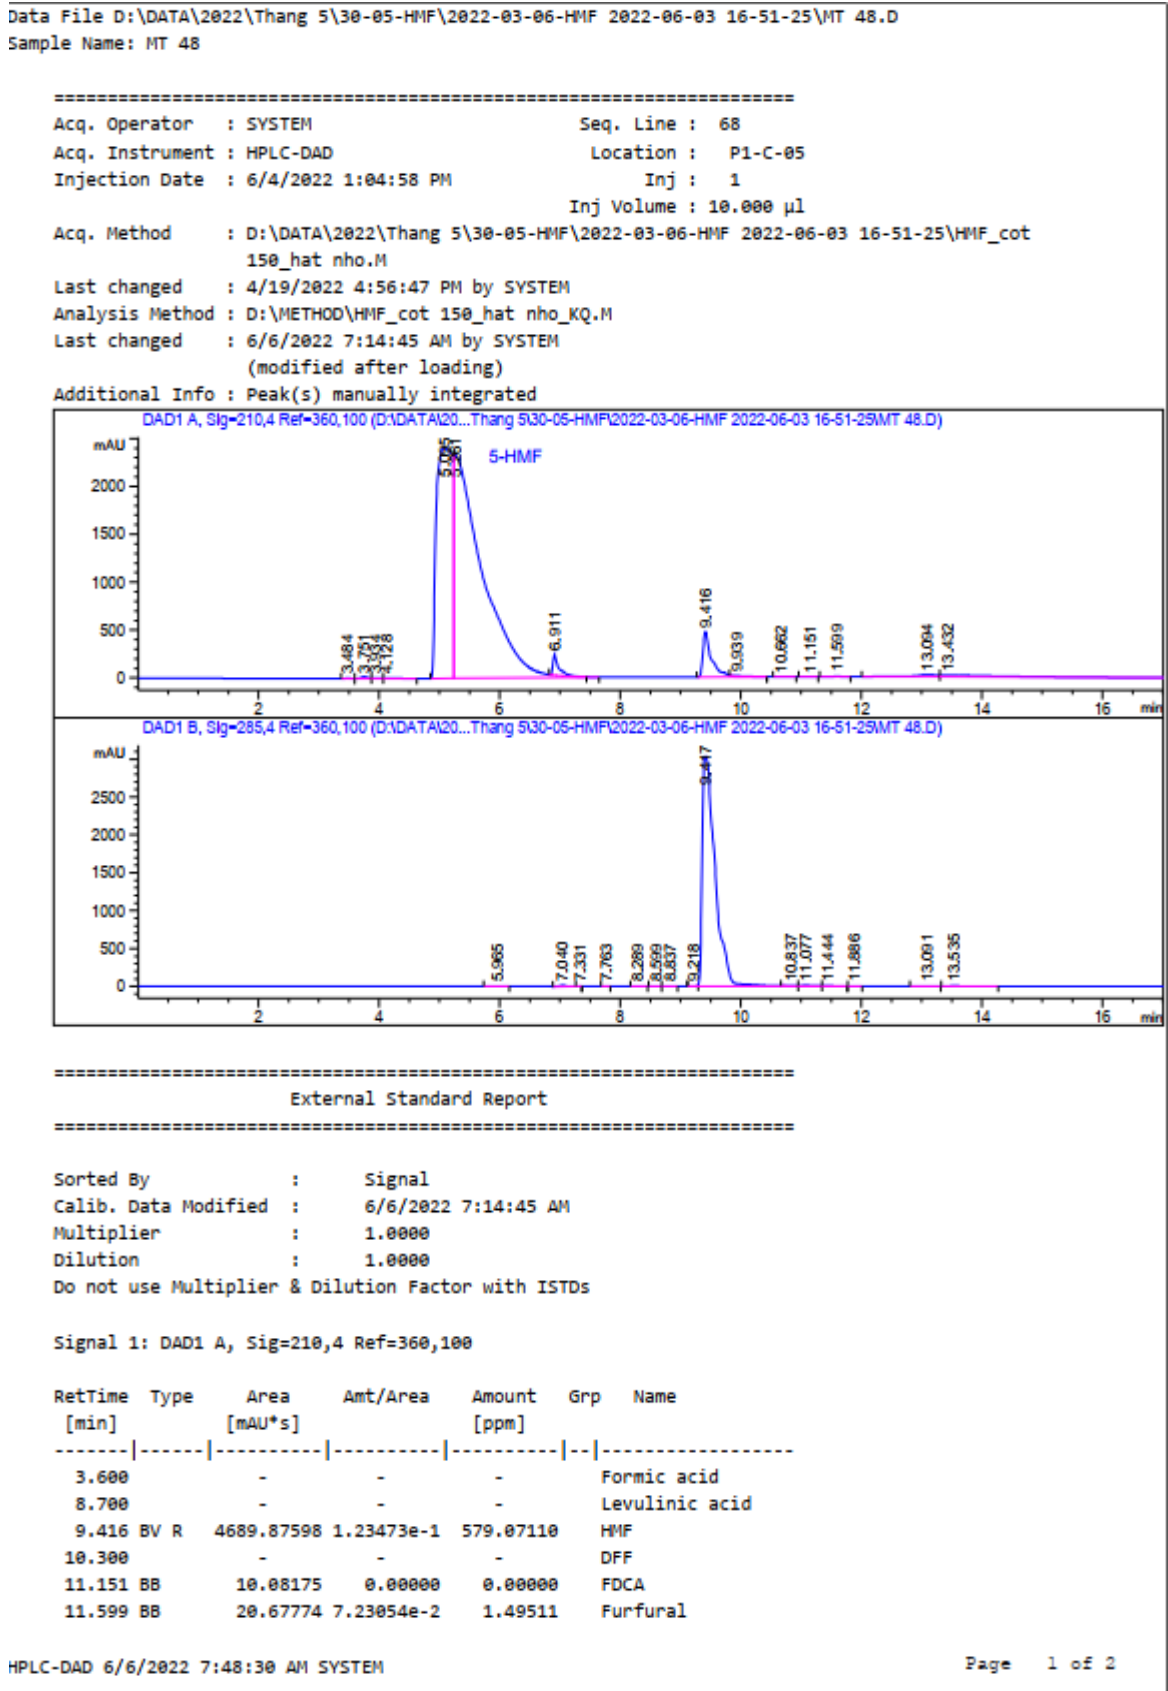

**Figure S4-34:** HPLC chromatography of 5-HMF in investigating catalytic performance. Reaction conditions: Fructose (1mmol), DMSO, for 12 hours at 80 °C.

Data File D:\DATA\2022\Thang 5\30-05-HMF\2022-03-06-HMF 2022-06-03 16-51-25\MT 49.D  
 Sample Name: MT 49

```

=====
Acq. Operator   : SYSTEM                      Seq. Line :   69
Acq. Instrument : HPLC-DAD                    Location  : P1-C-06
Injection Date  : 6/4/2022 1:23:04 PM         Inj       :    1
                                           Inj Volume: 10.000 µl
Acq. Method     : D:\DATA\2022\Thang 5\30-05-HMF\2022-03-06-HMF 2022-06-03 16-51-25\HMF_cot
                  150_hat_nho.M
Last changed    : 4/19/2022 4:56:47 PM by SYSTEM
Analysis Method : D:\METHOD\HMF_cot 150_hat_nho_KQ.M
Last changed    : 6/6/2022 7:14:45 AM by SYSTEM
                  (modified after loading)
Additional Info  : Peak(s) manually integrated
  
```

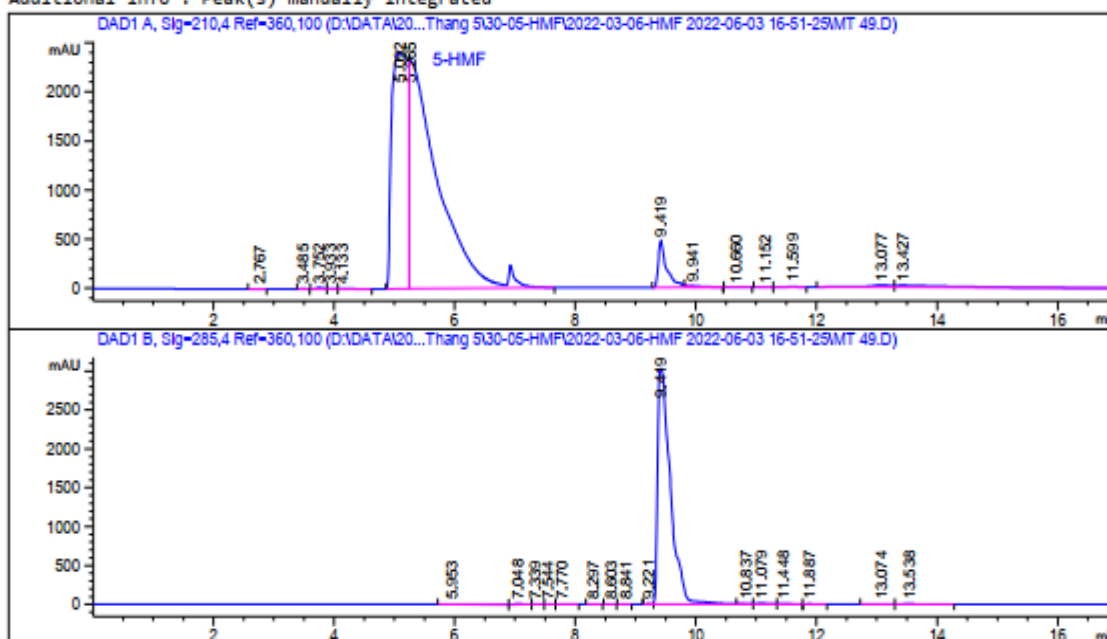

External Standard Report

```

Sorted By      : Signal
Calib. Data Modified : 6/6/2022 7:14:45 AM
Multiplier     : 1.0000
Dilution       : 1.0000
Do not use Multiplier & Dilution Factor with ISTDs
  
```

Signal 1: DAD1 A, Sig=210,4 Ref=360,100

| RetTime [min] | Type | Area [mAU*s] | Amt/Area   | Amount [ppm] | Grp | Name           |
|---------------|------|--------------|------------|--------------|-----|----------------|
| 3.600         | -    | -            | -          | -            | -   | Formic acid    |
| 8.700         | -    | -            | -          | -            | -   | Levulinic acid |
| 9.419         | BV R | 4690.57861   | 1.23473e-1 | 579.15806    | -   | HMF            |
| 10.300        | -    | -            | -          | -            | -   | DFF            |
| 11.152        | BV   | 12.56385     | 0.00000    | 0.00000      | -   | FDCA           |
| 11.599        | VB   | 29.78968     | 8.27507e-2 | 2.46512      | -   | Furfural       |

**Figure S4-35:** HPLC chromatography of 5-HMF in investigating catalytic performance. Reaction conditions: Fructose (1mmol), DMSO, for 12 hours at 100 °C.

Data File D:\DATA\2022\Thang 5\30-05-HMF\2022-03-06-HMF 2022-06-03 16-51-25\MT 50.D  
 Sample Name: MT 50

```

=====
Acq. Operator   : SYSTEM                      Seq. Line :   70
Acq. Instrument : HPLC-DAD                   Location  : P1-C-07
Injection Date  : 6/4/2022 1:41:11 PM        Inj       :    1
                                           Inj Volume: 10.000 µl
Acq. Method     : D:\DATA\2022\Thang 5\30-05-HMF\2022-03-06-HMF 2022-06-03 16-51-25\HMF_cot
                                           150_hat_nho.M
Last changed    : 4/19/2022 4:56:47 PM by SYSTEM
Analysis Method : D:\METHOD\HMF_cot 150_hat_nho_KQ.M
Last changed    : 6/6/2022 7:14:45 AM by SYSTEM
                (modified after loading)
  
```

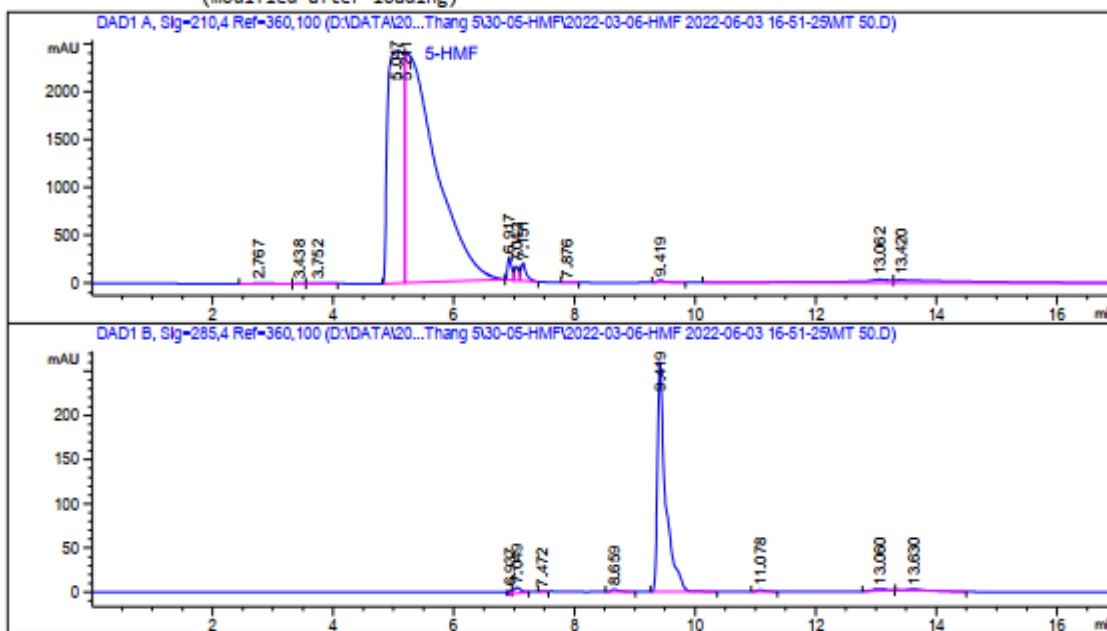

External Standard Report

```

Sorted By      : Signal
Calib. Data Modified : 6/6/2022 7:14:45 AM
Multiplier     : 1.0000
Dilution       : 1.0000
Do not use Multiplier & Dilution Factor with ISTDs
  
```

Signal 1: DAD1 A, Sig=210,4 Ref=360,100

| RetTime [min] | Type | Area [mAU*s] | Amt/Area   | Amount [ppm] | Grp | Name           |
|---------------|------|--------------|------------|--------------|-----|----------------|
| 3.600         | -    | -            | -          | -            | -   | Formic acid    |
| 8.700         | -    | -            | -          | -            | -   | Levulinic acid |
| 9.419         | BB   | 189.97421    | 1.16391e-1 | 22.11138     | -   | HMF            |
| 10.300        | -    | -            | -          | -            | -   | DFF            |
| 11.000        | -    | -            | -          | -            | -   | FDCA           |
| 11.600        | -    | -            | -          | -            | -   | Furfural       |

**Figure S4-36:** HPLC chromatography of 5-HMF in investigating catalytic performance. Reaction conditions: Fructose (1mmol), DMSO, for 12 hours at 120 °C.

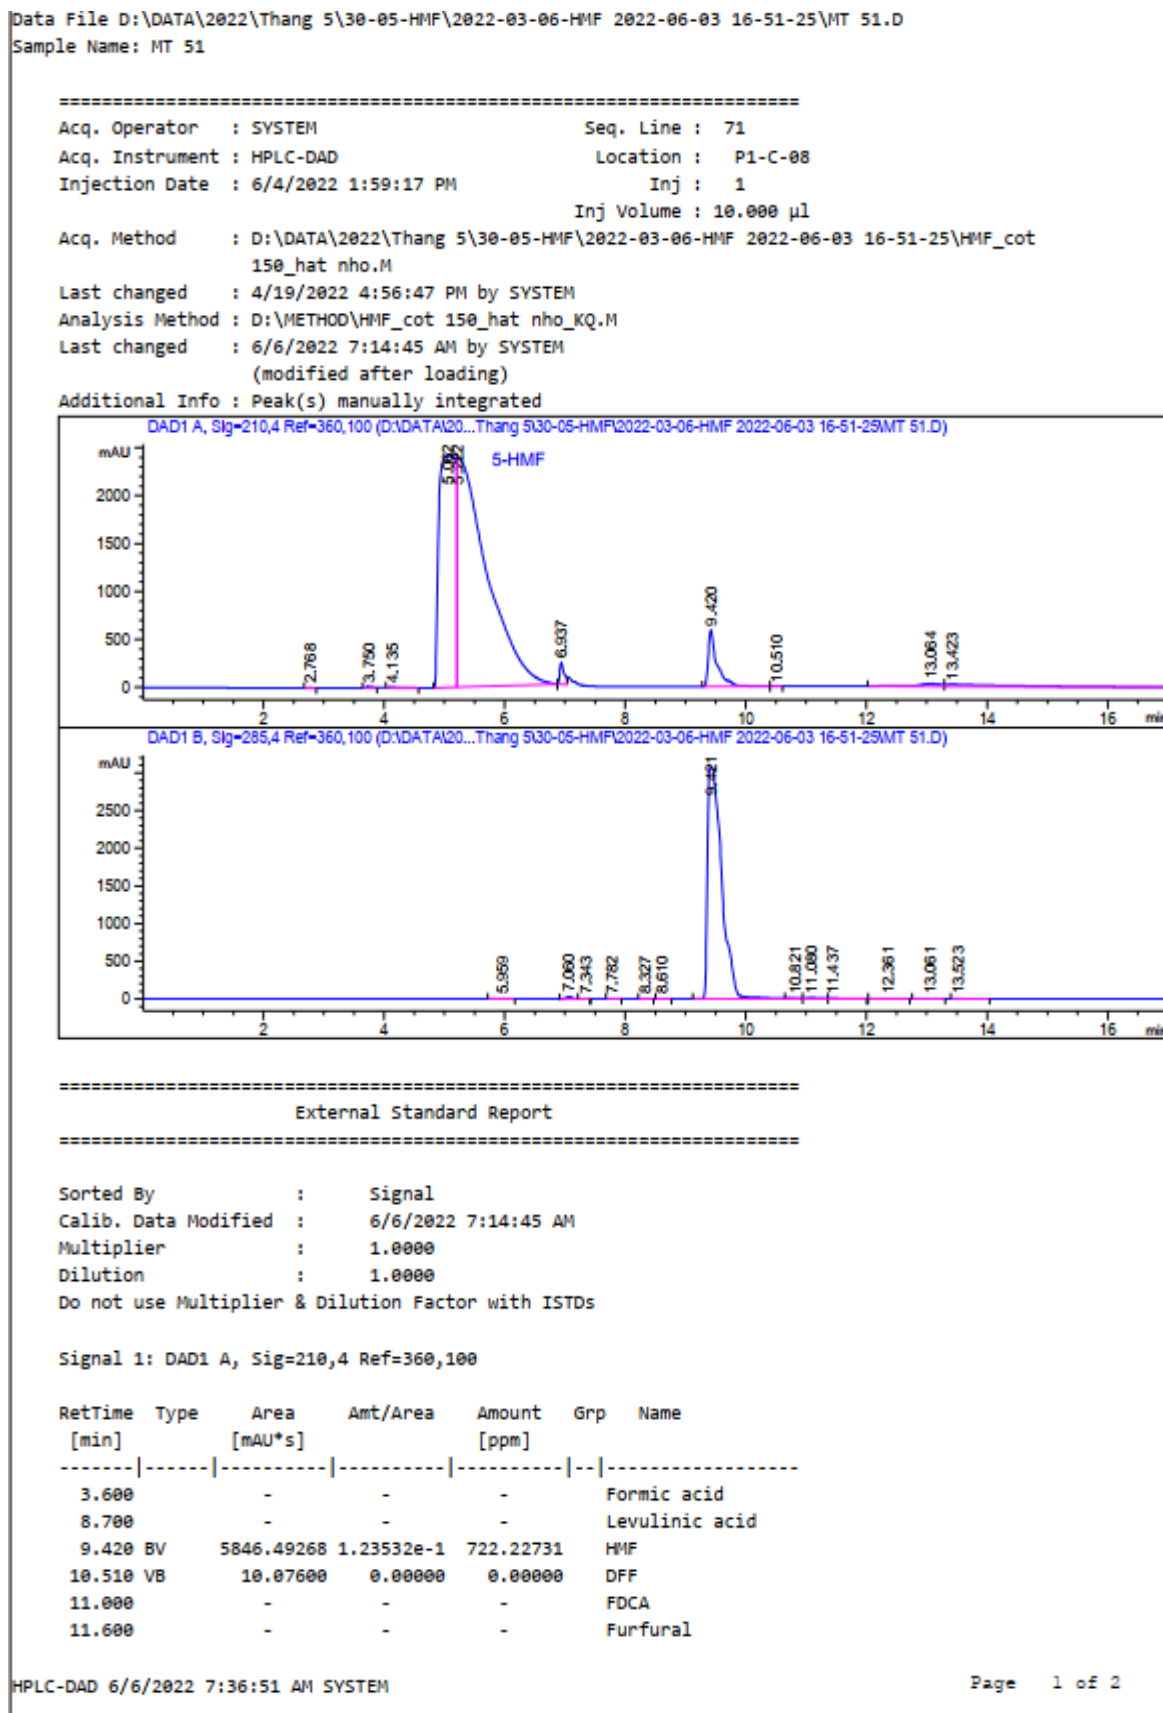

**Figure S4-37:** HPLC chromatography of 5-HMF in investigating catalytic performance. Reaction conditions: Fructose (1mmol), DMSO, for 12 hours at 140 °C.

Data File D:\DATA\2022\Thang 5\30-05-HMF\2022-03-06-HMF 2022-06-03 16-51-25\MT 52.D  
 Sample Name: MT 52

```

=====
Acq. Operator   : SYSTEM                      Seq. Line : 72
Acq. Instrument : HPLC-DAD                    Location  : P1-C-09
Injection Date  : 6/4/2022 2:17:23 PM         Inj       : 1
                                           Inj Volume: 10.000 µl
Acq. Method     : D:\DATA\2022\Thang 5\30-05-HMF\2022-03-06-HMF 2022-06-03 16-51-25\HMF_cot
                                           150_hat_nho.M
Last changed    : 4/19/2022 4:56:47 PM by SYSTEM
Analysis Method : D:\METHOD\HMF_cot 150_hat_nho_KQ.M
Last changed    : 6/6/2022 7:14:45 AM by SYSTEM
                (modified after loading)
  
```

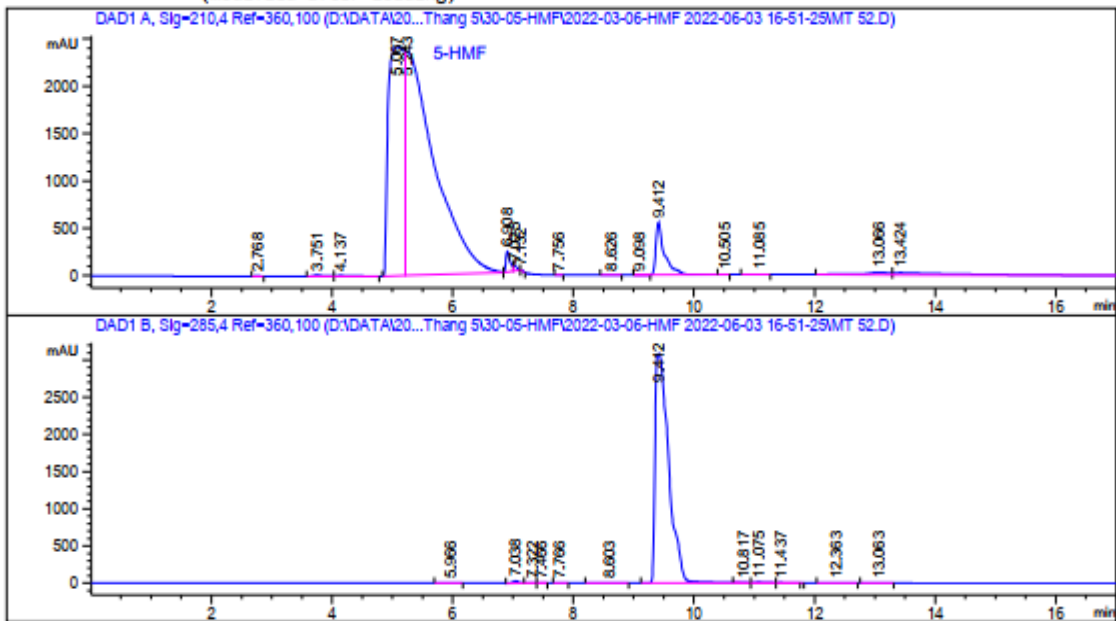

External Standard Report

```

Sorted By      : Signal
Calib. Data Modified : 6/6/2022 7:14:45 AM
Multiplier     : 1.0000
Dilution       : 1.0000
Do not use Multiplier & Dilution Factor with ISTDs
  
```

Signal 1: DAD1 A, Sig=210,4 Ref=360,100

| RetTime [min] | Type | Area [mAU*s] | Amt/Area   | Amount [ppm] | Grp | Name           |
|---------------|------|--------------|------------|--------------|-----|----------------|
| 3.600         |      | -            | -          | -            |     | Formic acid    |
| 8.626         | BB   | 7.06291      | 4.22650    | 29.85140     |     | Levulinic acid |
| 9.412         | VV R | 5403.11621   | 1.23512e-1 | 667.34993    |     | HMF            |
| 10.505        | VB E | 3.83288      | 0.00000    | 0.00000      |     | DFF            |
| 11.085        | BB   | 8.85389      | 0.00000    | 0.00000      |     | FDCA           |
| 11.600        |      | -            | -          | -            |     | Furfural       |



**Figure S4-38:** HPLC chromatography of 5-HMF in investigating catalytic performance. Reaction conditions: Fructose (1mmol), DMSO, for 12 hours at 40 °C.

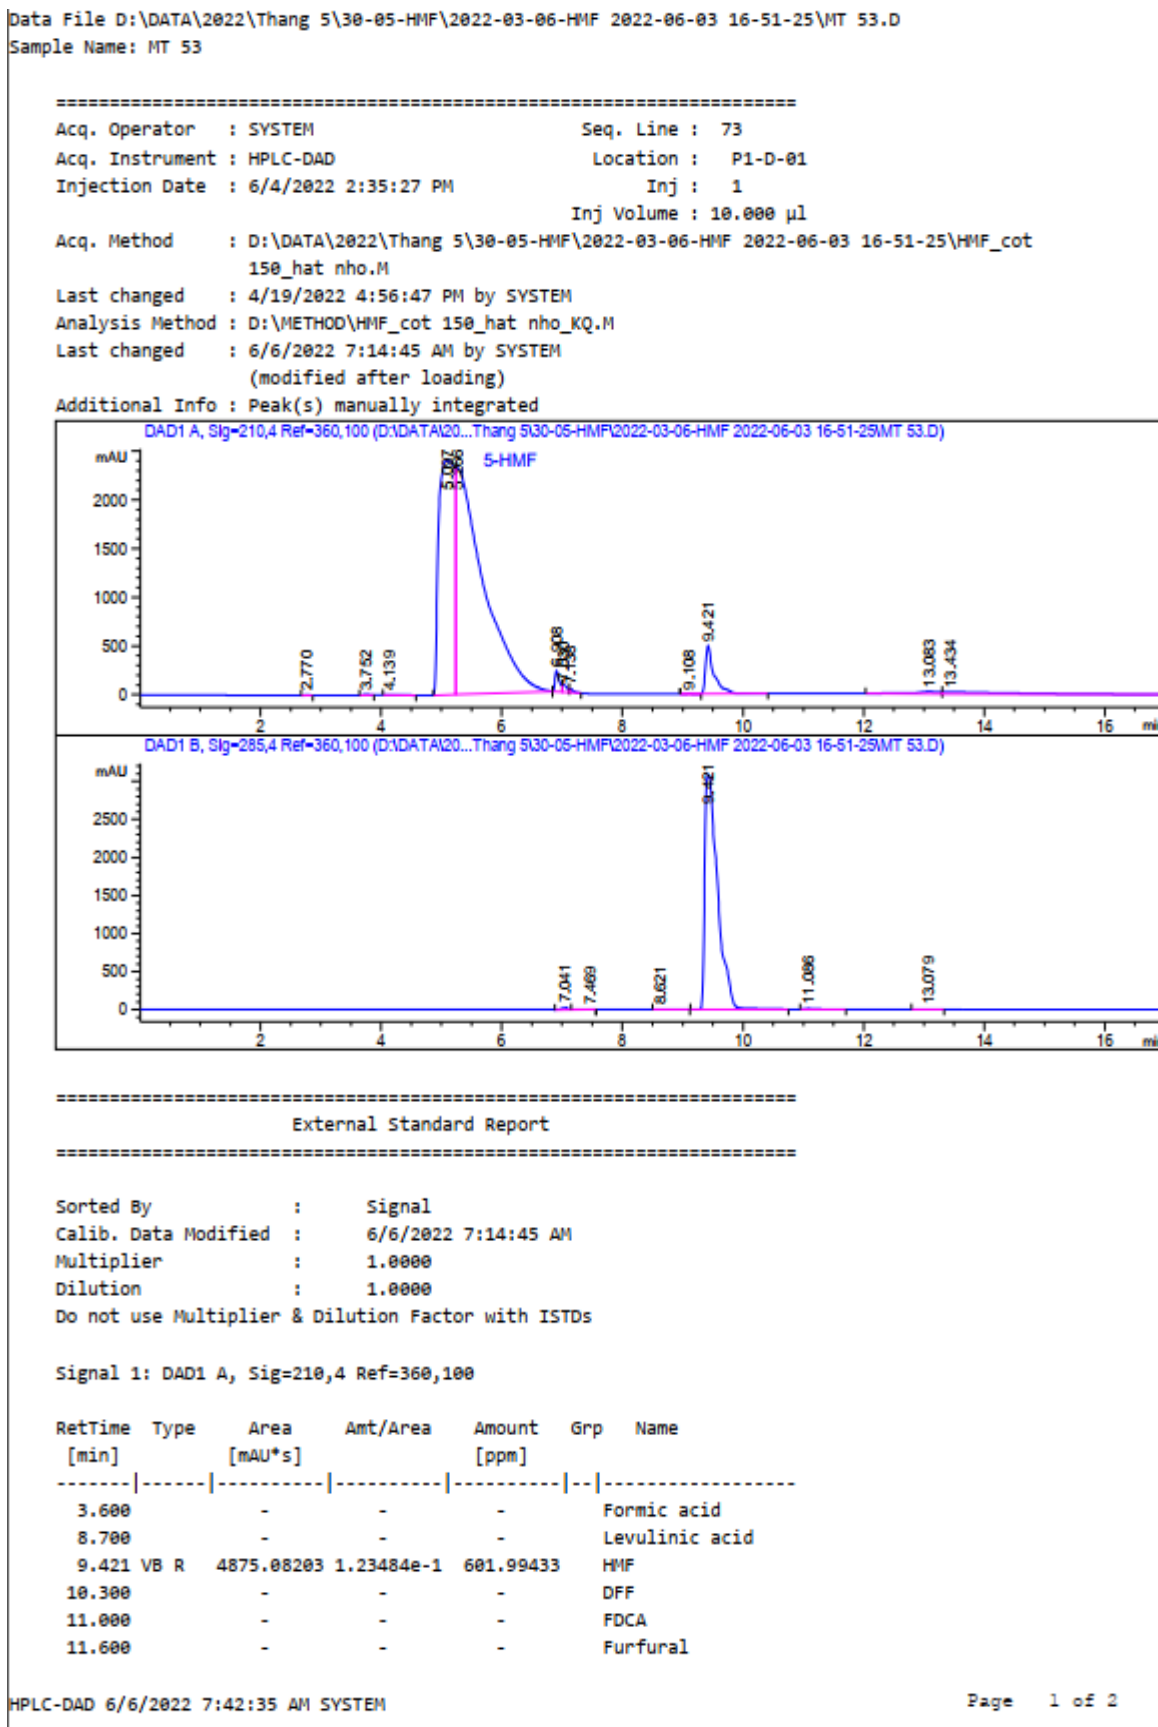



**Figure S4-39:** HPLC chromatography of 5-HMF in investigating catalytic performance. Reaction conditions: Fructose (1mmol), DMSO, for 12 hours at 60 °C.

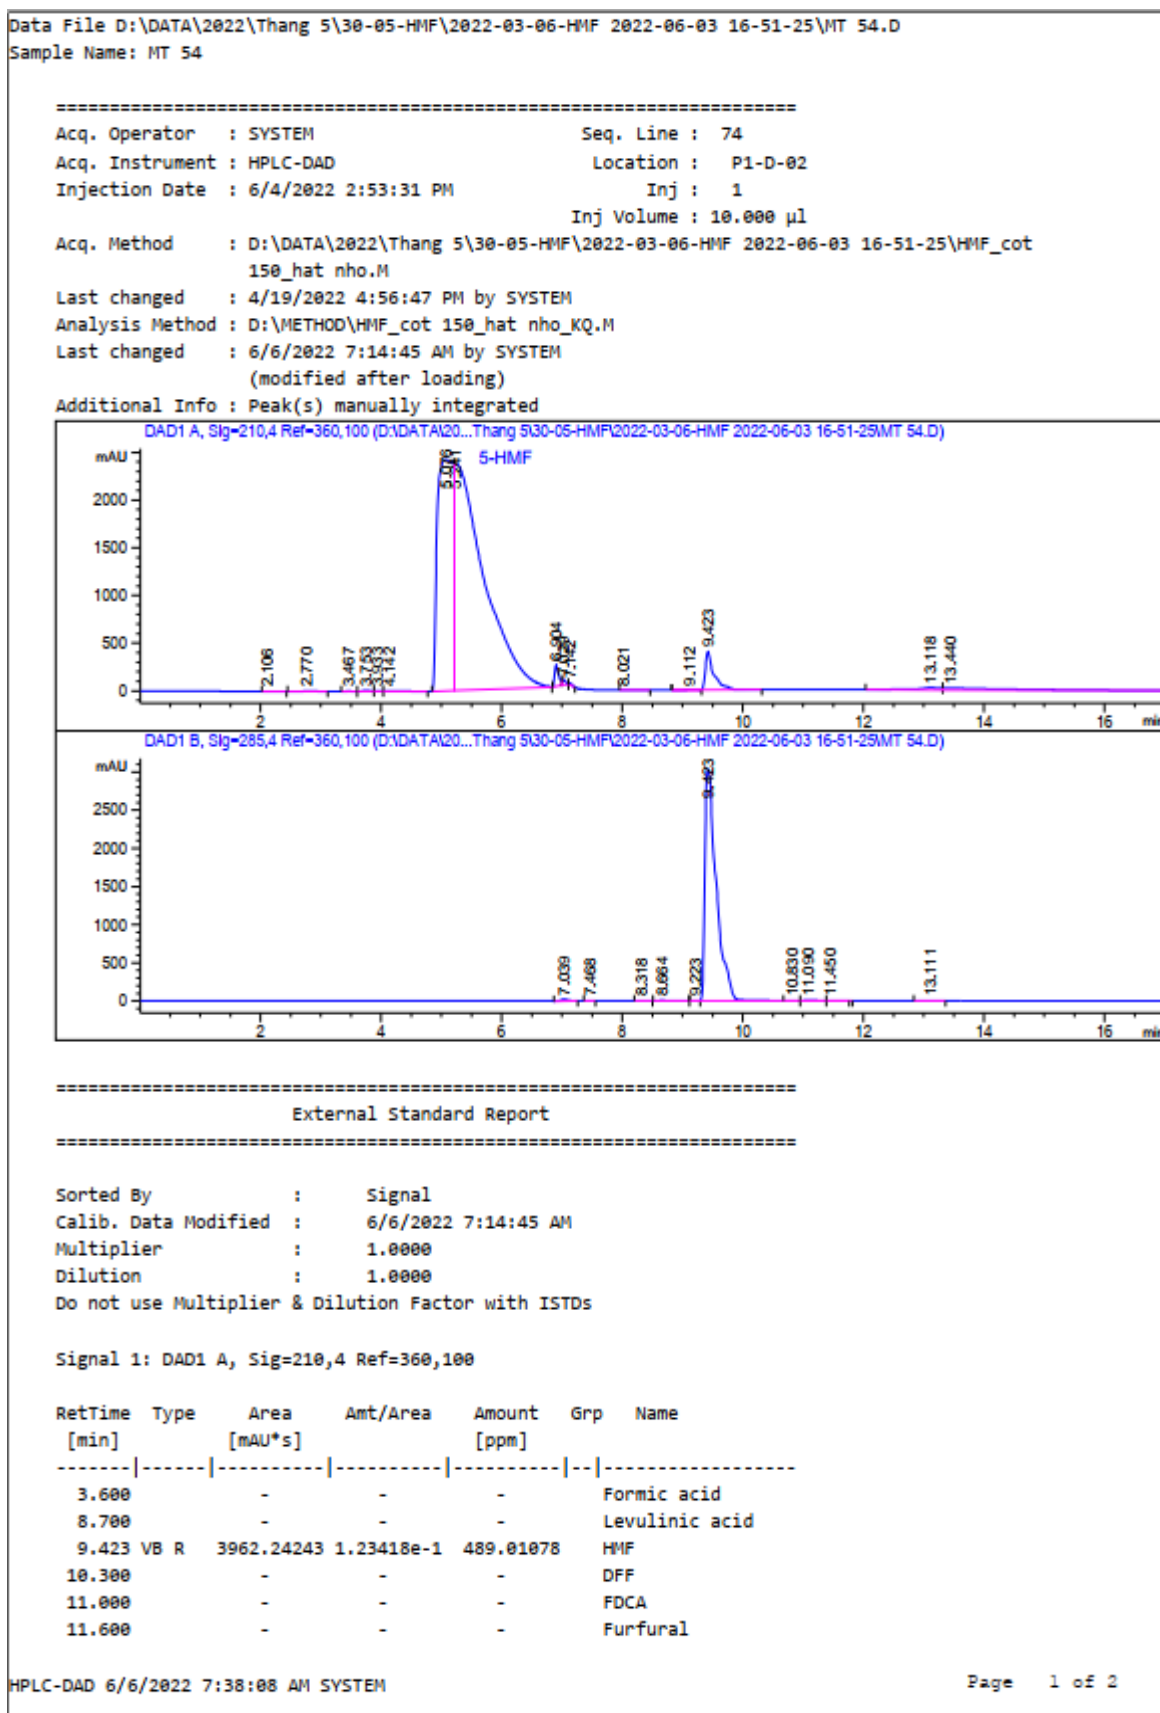

**Figure S4-40:** HPLC chromatography of 5-HMF in investigating catalytic performance. Reaction conditions: Fructose (1mmol), DMSO, for 12 hours at 80 °C.

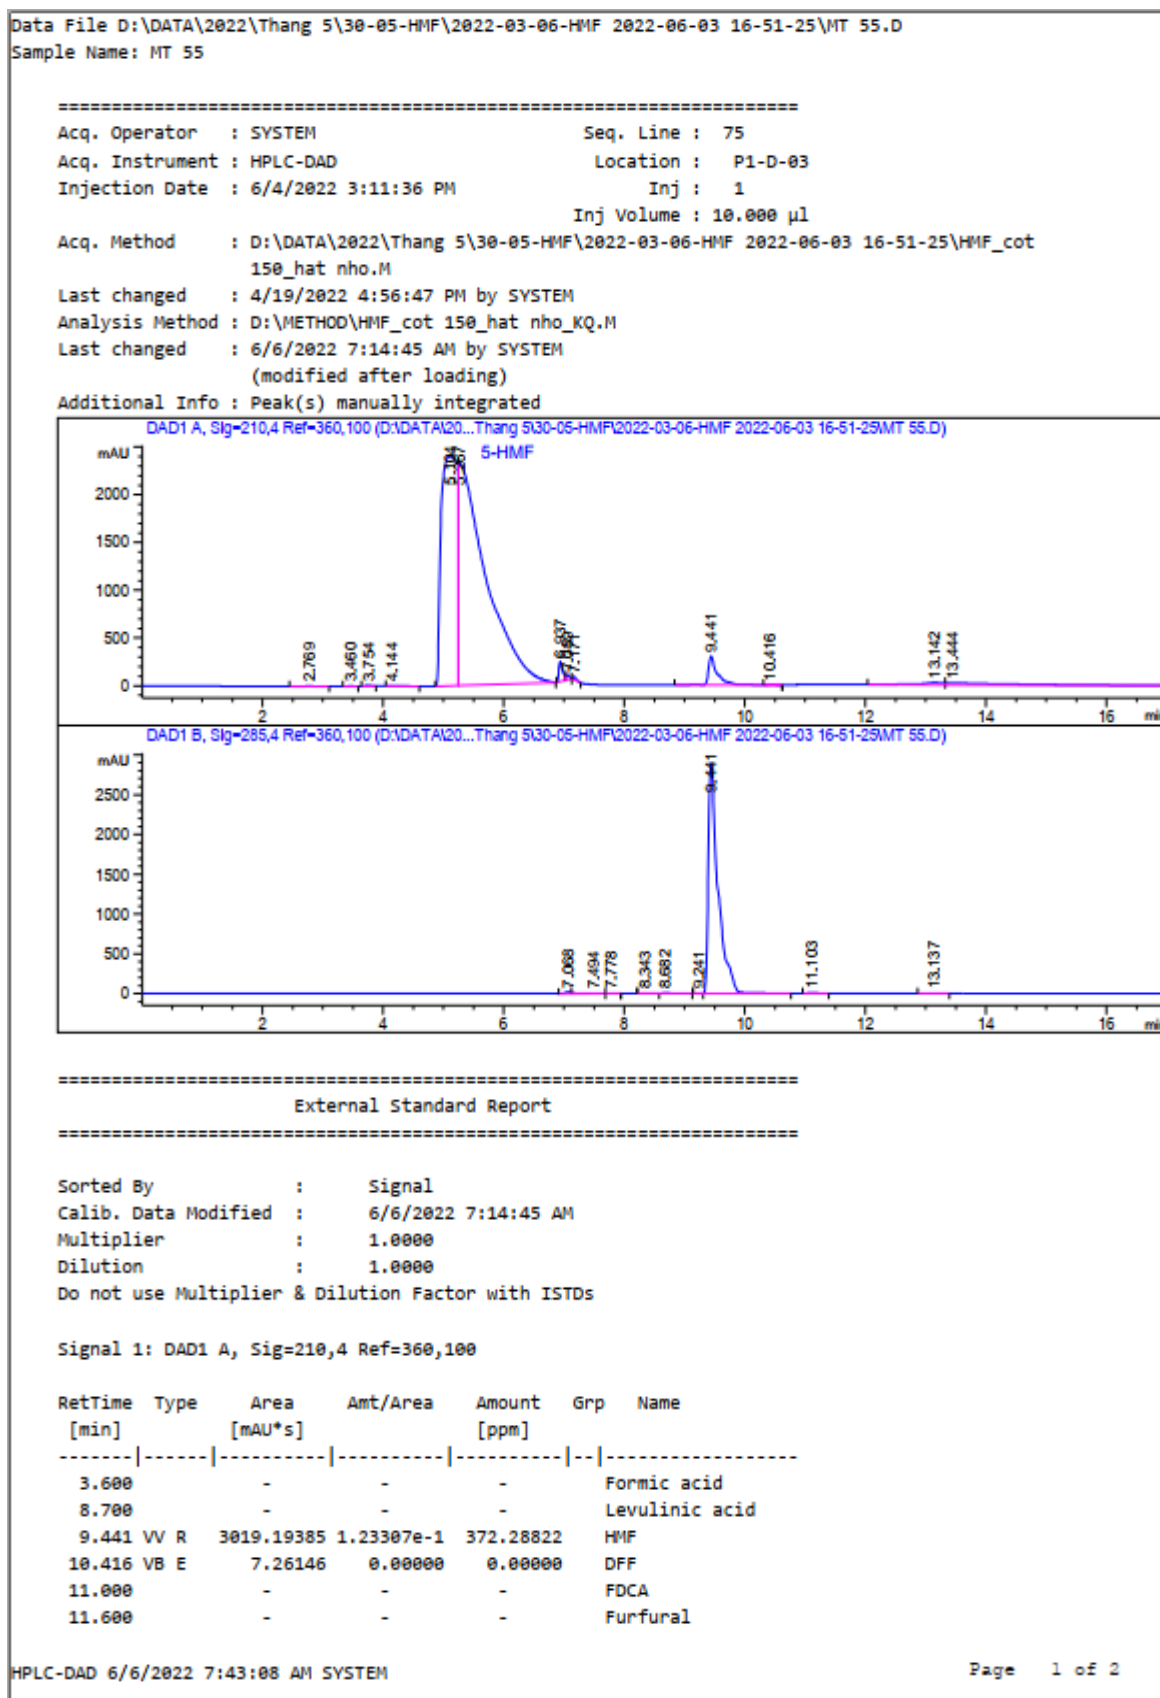

**Figure S4-41:** HPLC chromatography of 5-HMF in investigating catalytic performance. Reaction conditions: Fructose (1mmol), DMSO, for 12 hours at 100 °C.

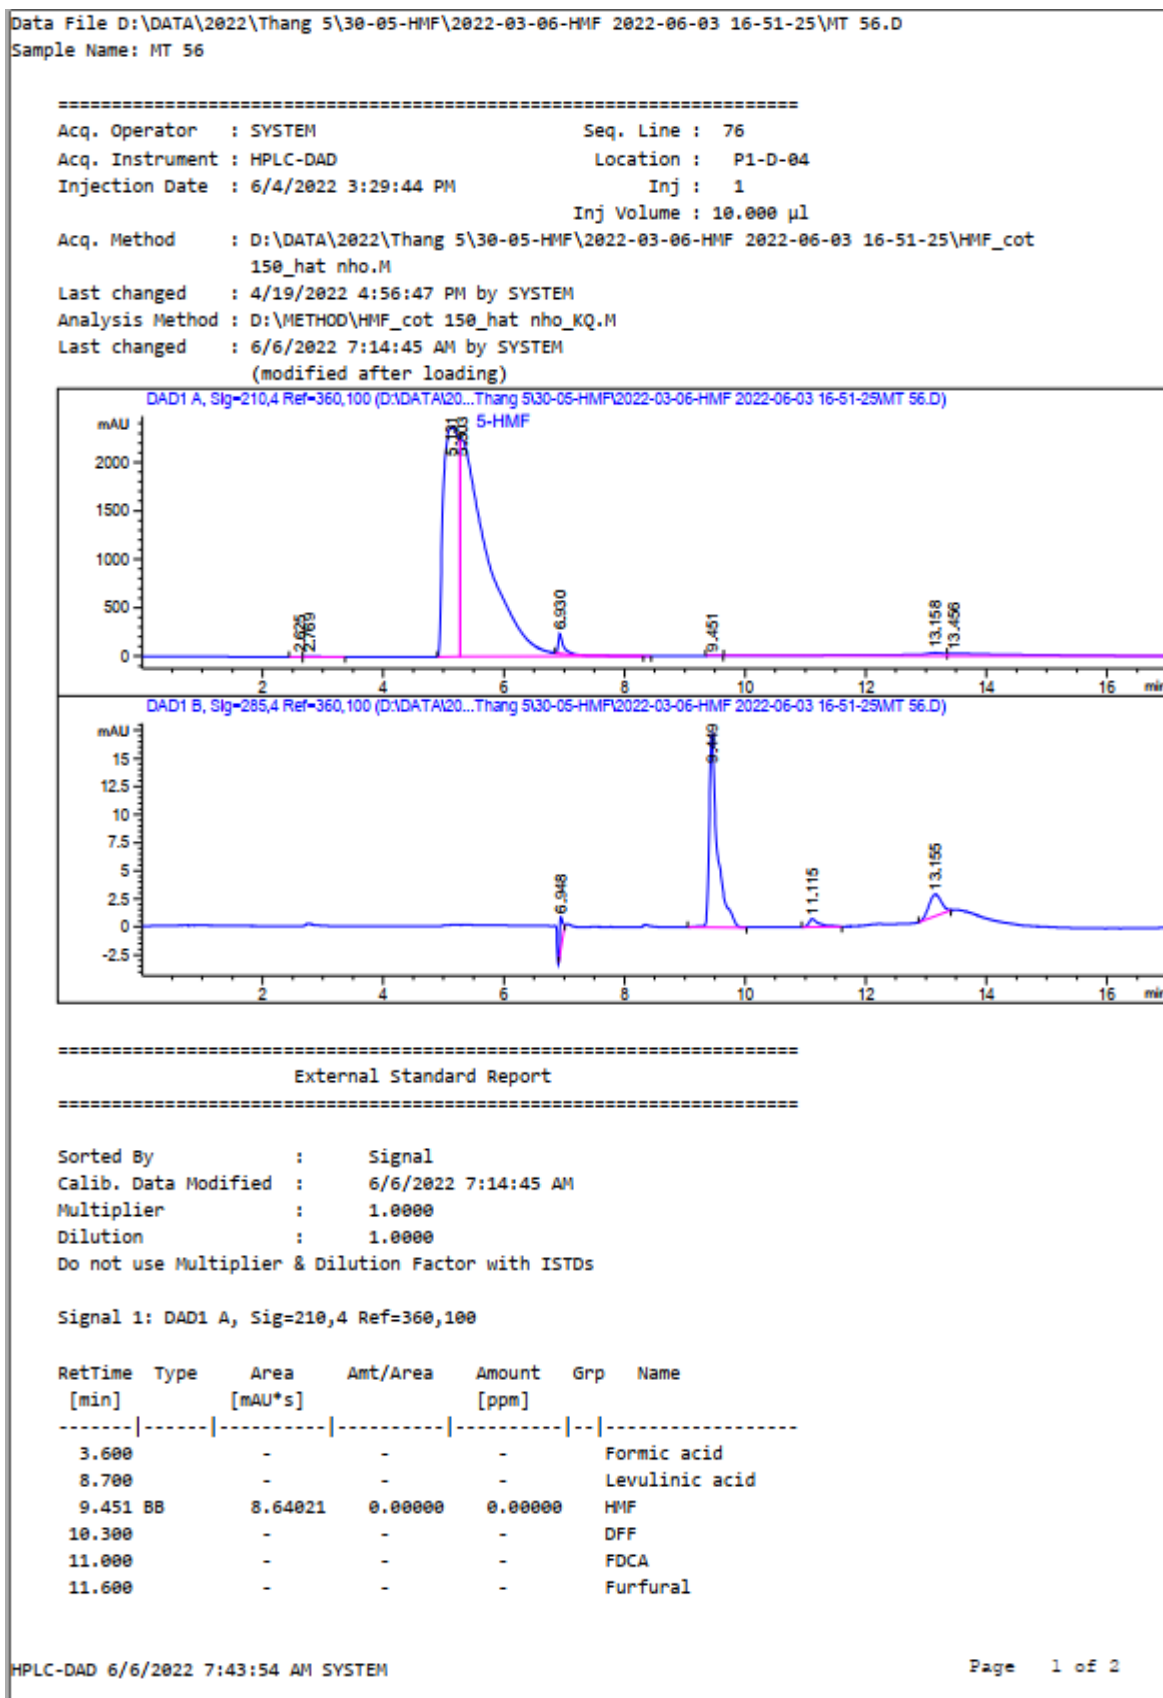

**Figure S4-42:** HPLC chromatography of 5-HMF in investigating catalytic performance. Reaction conditions: Fructose (1mmol), DMSO, for 12 hours at 120 °C.

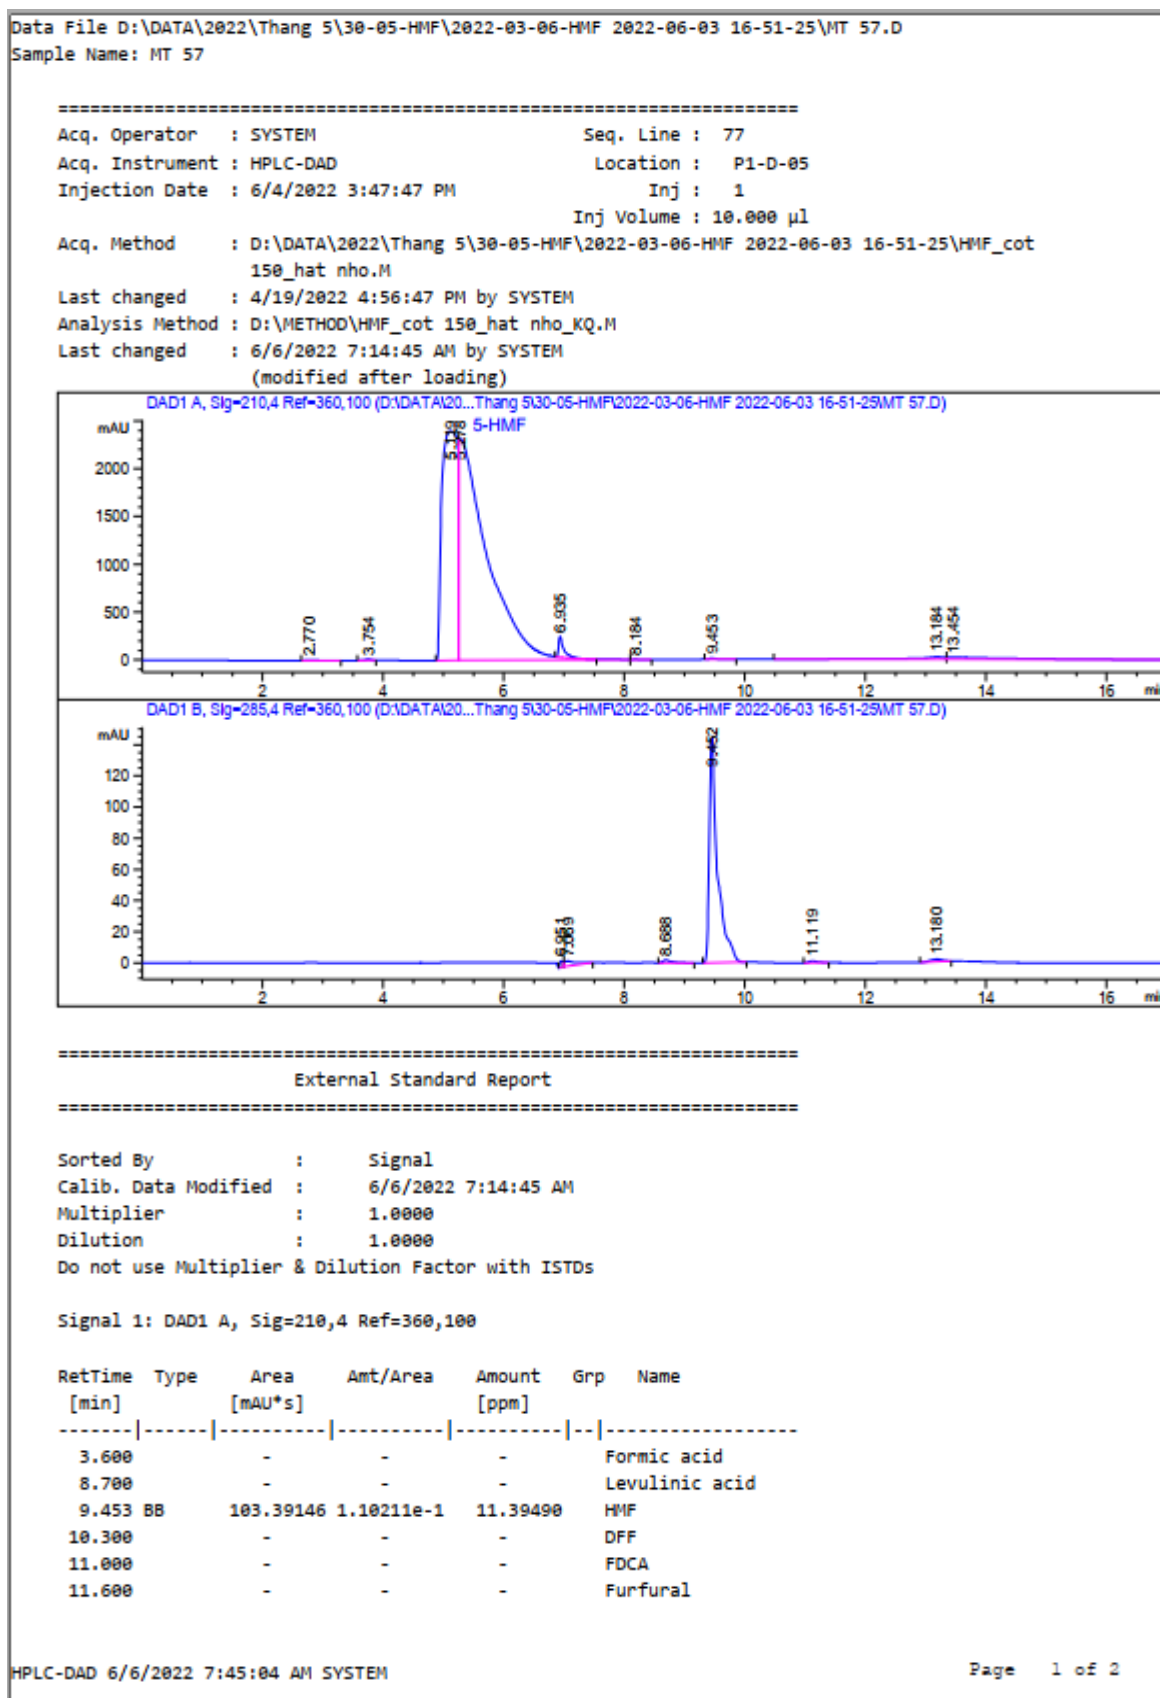

**Figure S4-43:** HPLC chromatography of 5-HMF in investigating catalytic performance. Reaction conditions: Fructose (1mmol), DMSO, for 12 hours at 140 °C.

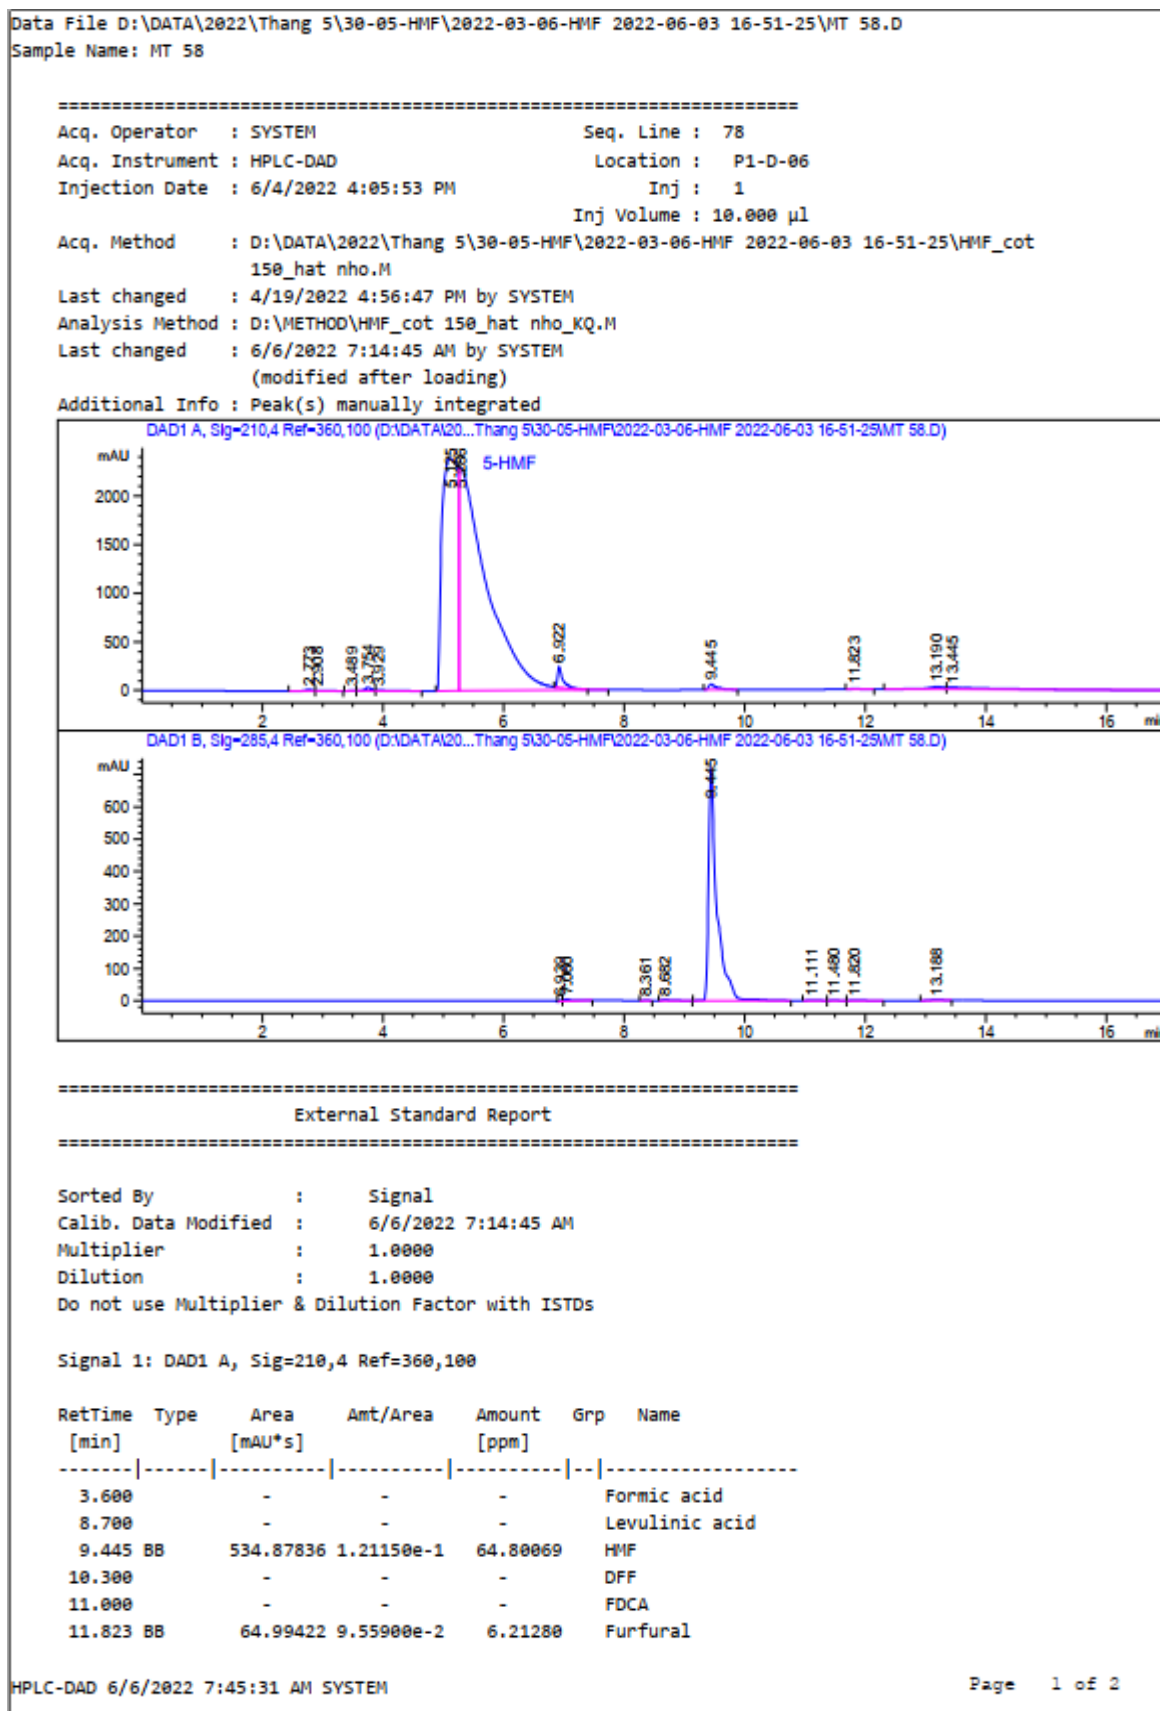

**Figure S4-44:** HPLC chromatography of 5-HMF in investigating catalytic performance. Reaction conditions: Fructose (1mmol), DMSO, for 3 hours at 120 °C.

Data File D:\DATA\2022\Thang 5\30-05-HMF\2022-03-06-HMF 2022-06-03 16-51-25\MT 59.D  
 Sample Name: MT 59

```

=====
Acq. Operator   : SYSTEM                      Seq. Line :   79
Acq. Instrument : HPLC-DAD                   Location  : P1-D-07
Injection Date  : 6/4/2022 4:23:57 PM        Inj       :    1
                                           Inj Volume: 10.000 µl
Acq. Method     : D:\DATA\2022\Thang 5\30-05-HMF\2022-03-06-HMF 2022-06-03 16-51-25\HMF_cot
                                           150_hat_nho.M
Last changed    : 4/19/2022 4:56:47 PM by SYSTEM
Analysis Method : D:\METHOD\HMF_cot 150_hat_nho_KQ.M
Last changed    : 6/6/2022 7:14:45 AM by SYSTEM
                                           (modified after loading)
Additional Info  : Peak(s) manually integrated
  
```

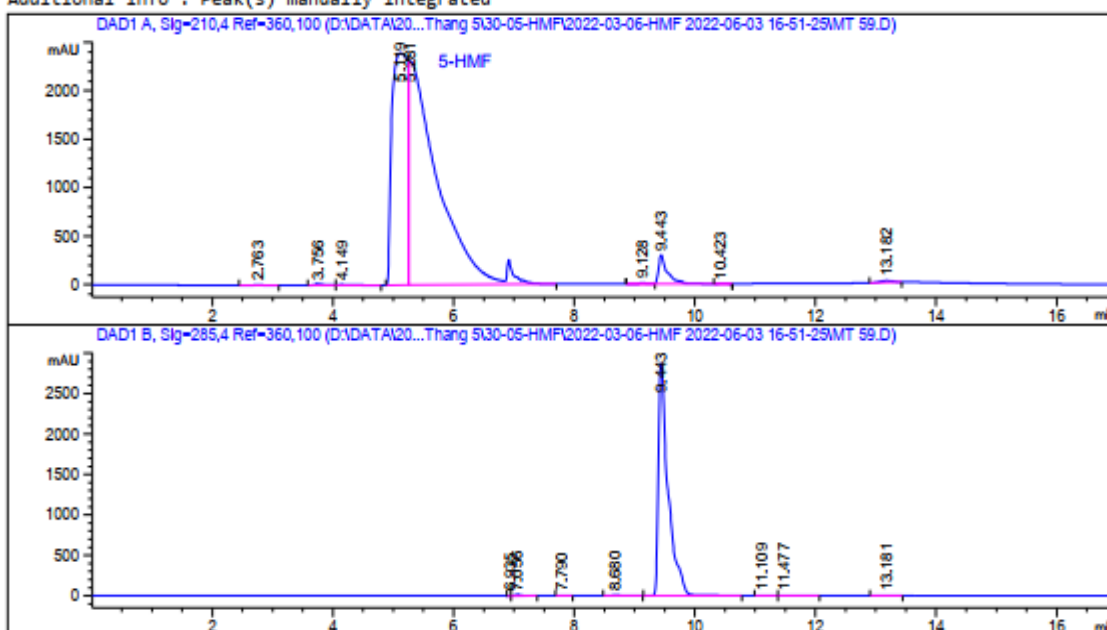

External Standard Report

```

Sorted By      : Signal
Calib. Data Modified : 6/6/2022 7:14:45 AM
Multiplier     : 1.0000
Dilution       : 1.0000
Do not use Multiplier & Dilution Factor with ISTDs
  
```

Signal 1: DAD1 A, Sig=210,4 Ref=360,100

| RetTime [min] | Type | Area [mAU*s] | Amt/Area   | Amount [ppm] | Grp | Name           |
|---------------|------|--------------|------------|--------------|-----|----------------|
| 3.600         | -    | -            | -          | -            | -   | Formic acid    |
| 8.700         | -    | -            | -          | -            | -   | Levulinic acid |
| 9.443         | VV R | 2976.97827   | 1.23301e-1 | 367.06313    | -   | HMF            |
| 10.423        | VB E | 10.87321     | 0.00000    | 0.00000      | -   | DFF            |
| 11.000        | -    | -            | -          | -            | -   | FDCA           |
| 11.600        | -    | -            | -          | -            | -   | Furfural       |

**Figure S4-45:** HPLC chromatography of 5-HMF in investigating catalytic performance. Reaction conditions: Fructose (1mmol), DMSO, for 3 hours at 120 °C.

Data File D:\DATA\2022\Thang 5\30-05-HMF\2022-03-06-HMF 2022-06-03 16-51-25\MT 60.D  
 Sample Name: MT 60

```

=====
Acq. Operator   : SYSTEM                      Seq. Line :   80
Acq. Instrument : HPLC-DAD                   Location  : P1-D-08
Injection Date  : 6/4/2022 4:42:13 PM        Inj       :    1
                                           Inj Volume: 10.000 µl

Acq. Method    : D:\DATA\2022\Thang 5\30-05-HMF\2022-03-06-HMF 2022-06-03 16-51-25\HMF_cot
                150_hat_nho.M
Last changed   : 4/19/2022 4:56:47 PM by SYSTEM
Analysis Method: D:\METHOD\HMF_cot_150_hat_nho_KQ.M
Last changed   : 6/6/2022 7:14:45 AM by SYSTEM
                (modified after loading)
Additional Info : Peak(s) manually integrated
  
```

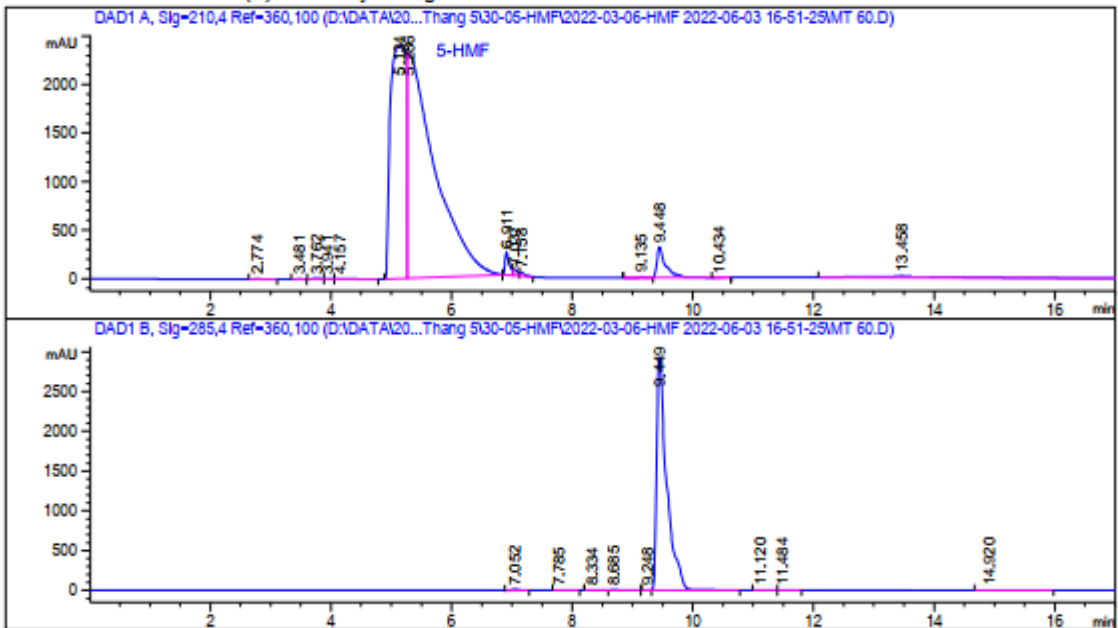

External Standard Report

```

Sorted By      : Signal
Calib. Data Modified : 6/6/2022 7:14:45 AM
Multiplier     : 1.0000
Dilution       : 1.0000
Do not use Multiplier & Dilution Factor with ISTDs
  
```

Signal 1: DAD1 A, Sig=210,4 Ref=360,100

| RetTime [min] | Type | Area [mAU*s] | Amt/Area   | Amount [ppm] | Grp | Name           |
|---------------|------|--------------|------------|--------------|-----|----------------|
| 3.600         | -    | -            | -          | -            | -   | Formic acid    |
| 8.700         | -    | -            | -          | -            | -   | Levulinic acid |
| 9.448         | VV R | 3141.55298   | 1.23325e-1 | 387.43279    | -   | HMF            |
| 10.434        | VB E | 8.76682      | 0.00000    | 0.00000      | -   | DFF            |
| 11.000        | -    | -            | -          | -            | -   | FDCA           |
| 11.600        | -    | -            | -          | -            | -   | Furfural       |



**Figure S4-46:** HPLC chromatography of 5-HMF in investigating catalytic performance. Reaction conditions: Fructose (1mmol), DMSO, for 3 hours at 120 °C.

Data File D:\DATA\2022\Thang 5\30-05-HMF\2022-03-06-HMF 2022-06-03 16-51-25\MT 61.D  
 Sample Name: MT 61

```

=====
Acq. Operator   : SYSTEM                      Seq. Line : 81
Acq. Instrument : HPLC-DAD                   Location  : P1-D-09
Injection Date  : 6/4/2022 5:00:36 PM       Inj       : 1
                                           Inj Volume: 10.000 µl
Acq. Method    : D:\DATA\2022\Thang 5\30-05-HMF\2022-03-06-HMF 2022-06-03 16-51-25\HMF_cot
                                           150_hat_nho.M
Last changed   : 4/19/2022 4:56:47 PM by SYSTEM
Analysis Method: D:\METHOD\HMF_cot 150_hat_nho_KQ.M
Last changed   : 6/6/2022 7:14:45 AM by SYSTEM
                                           (modified after loading)
Additional Info : Peak(s) manually integrated
  
```

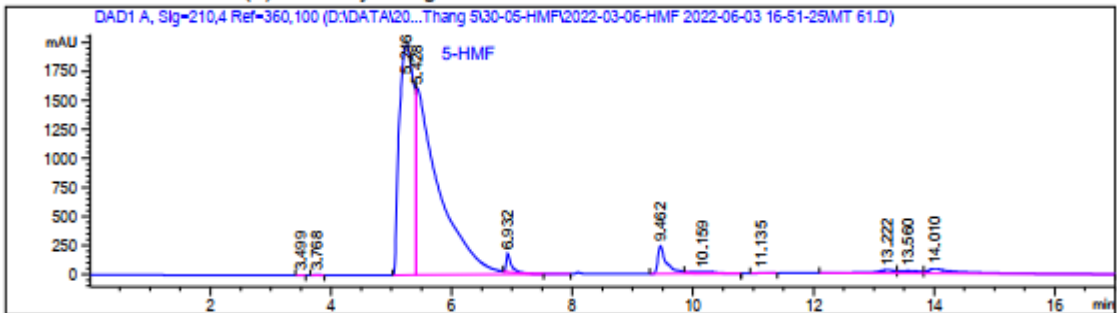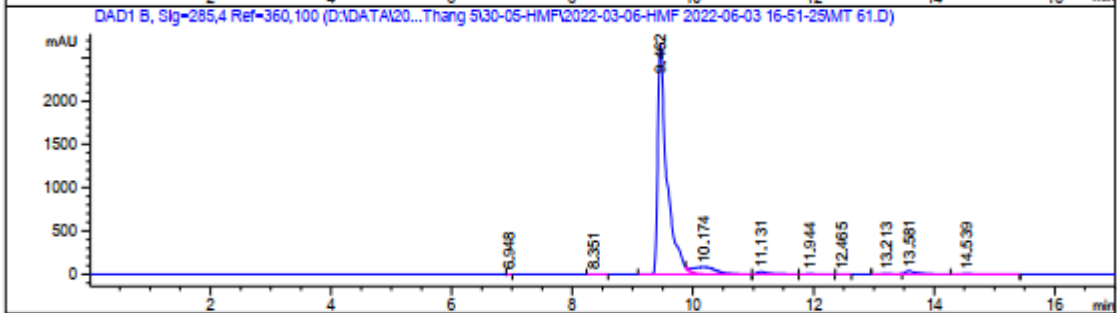

External Standard Report

```

Sorted By      : Signal
Calib. Data Modified : 6/6/2022 7:14:45 AM
Multiplier     : 1.0000
Dilution      : 1.0000
Do not use Multiplier & Dilution Factor with ISTDs
  
```

Signal 1: DAD1 A, Sig=210,4 Ref=360,100

| RetTime [min] | Type | Area [mAU*s] | Amt/Area   | Amount [ppm] | Grp | Name           |
|---------------|------|--------------|------------|--------------|-----|----------------|
| 3.600         | -    | -            | -          | -            | -   | Formic acid    |
| 8.700         | -    | -            | -          | -            | -   | Levulinic acid |
| 9.462         | BV R | 2490.86475   | 1.23209e-1 | 306.89612    | -   | HMF            |
| 10.159        | VB E | 388.66235    | 5.55145e-2 | 21.57639     | -   | DFF            |
| 11.135        | BB   | 33.04062     | 1.04708e-1 | 3.45963      | -   | FDCA           |
| 11.600        | -    | -            | -          | -            | -   | Furfural       |



**Figure S4-47:** HPLC chromatography of 5-HMF in investigating catalytic performance. Reaction conditions: Fructose (1mmol), DMSO, for 3 hours at 120 °C.

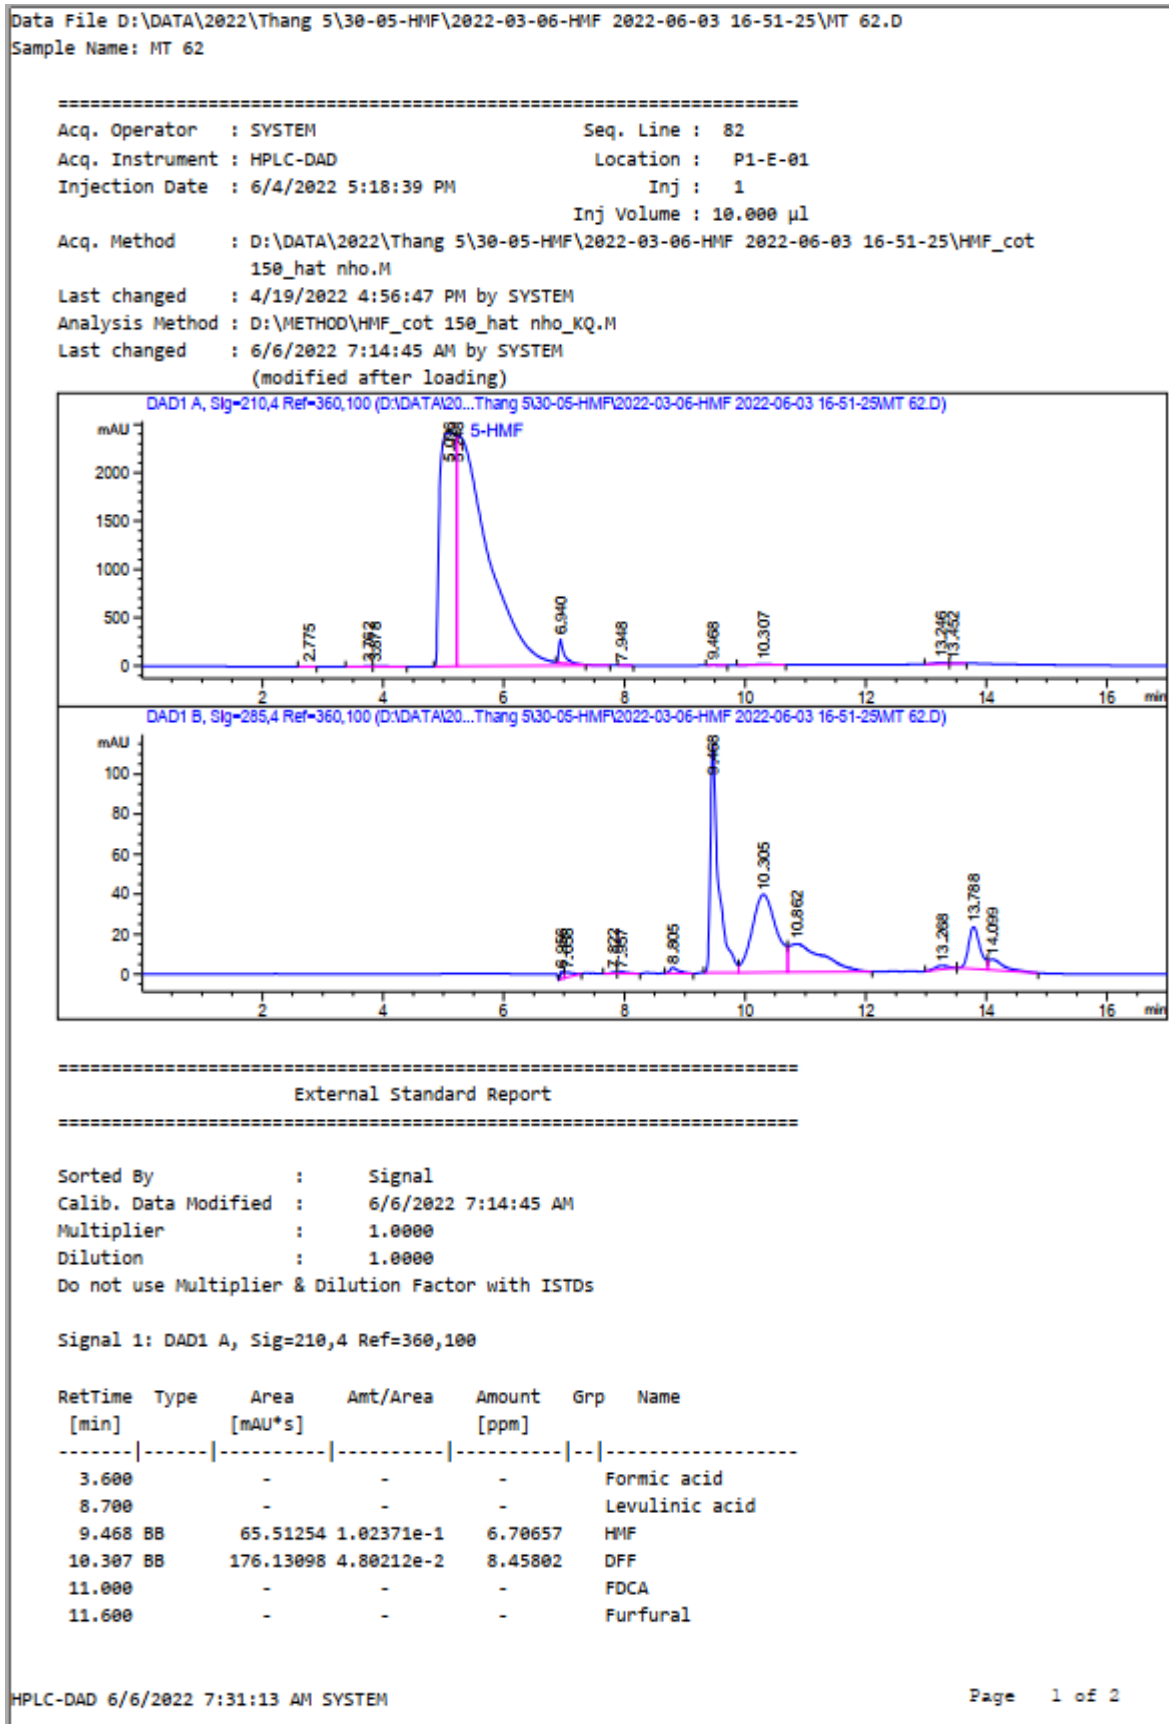

**Figure S4-48:** HPLC chromatography of 5-HMF in investigating catalytic performance. Reaction conditions: Fructose (1mmol), DMSO, for 3 hours at 120 °C.

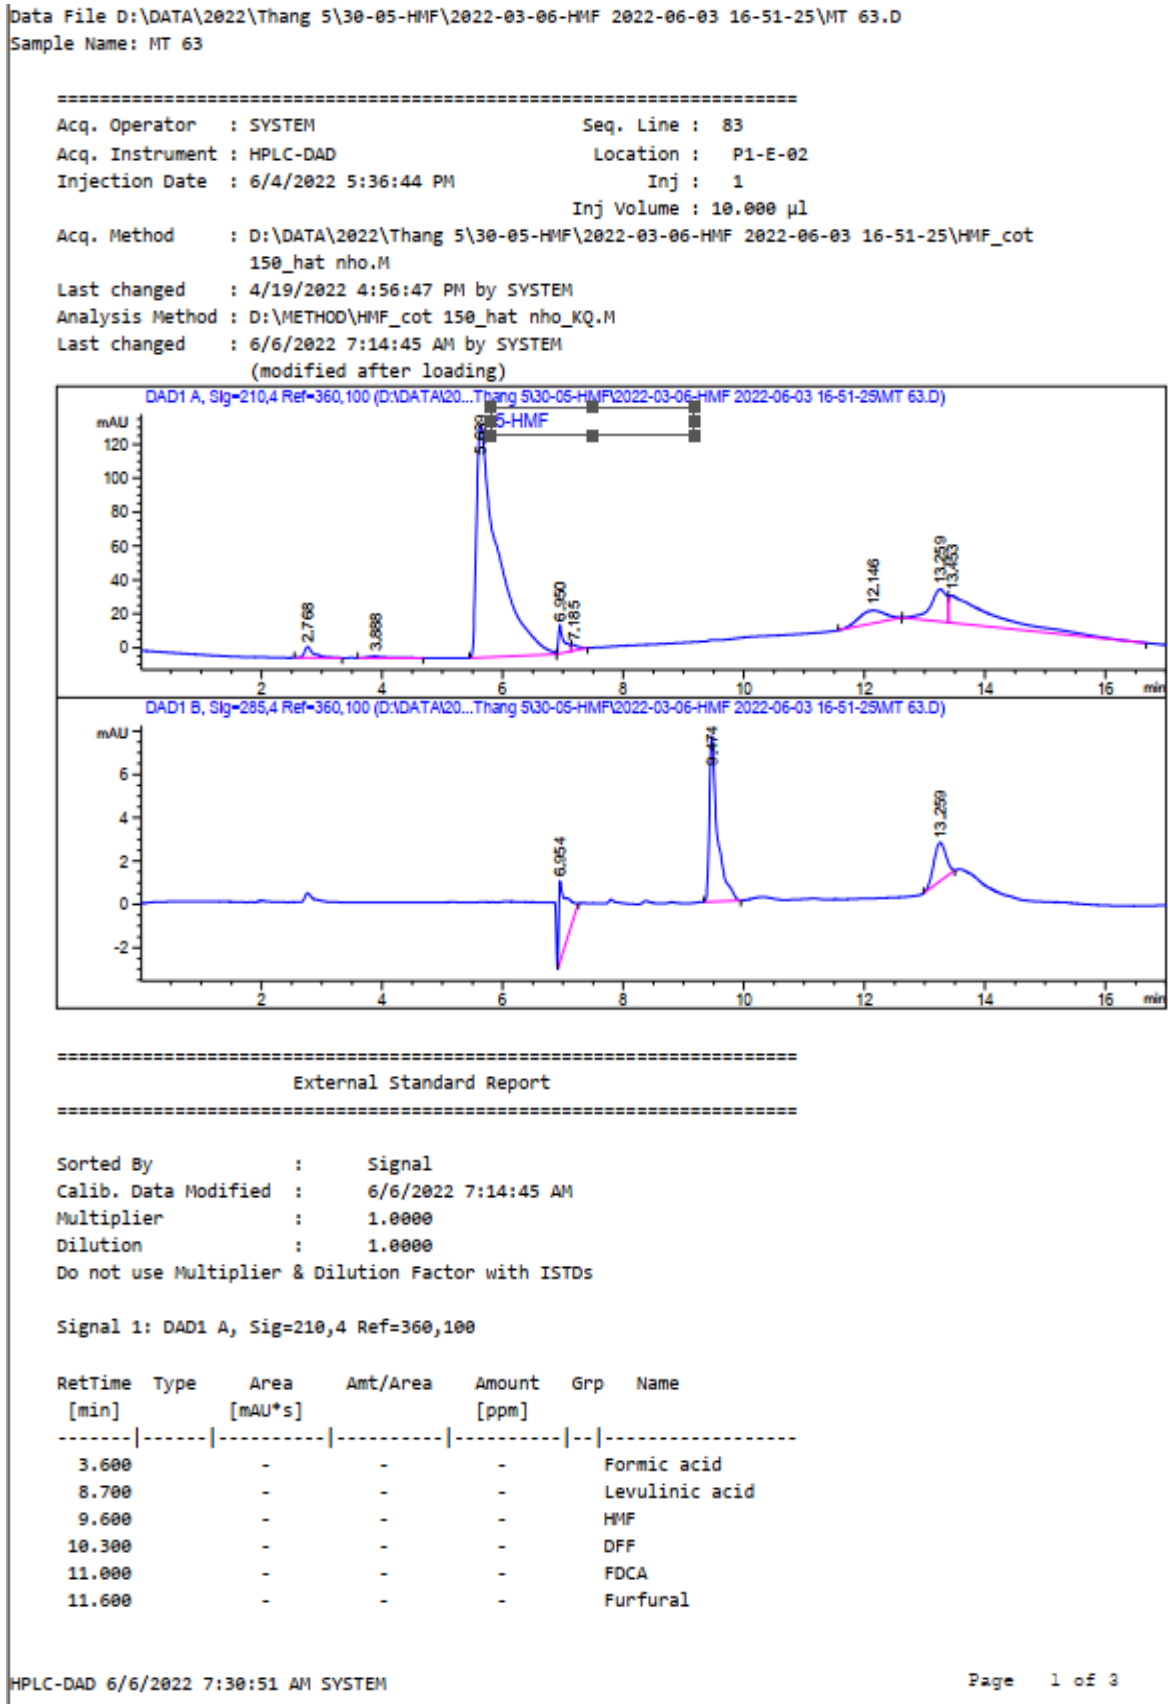

**Figure S4-49:** HPLC chromatography of 5-HMF in investigating catalytic performance. Reaction conditions: Fructose (1mmol), DMSO, for 3 hours at 120 °C.

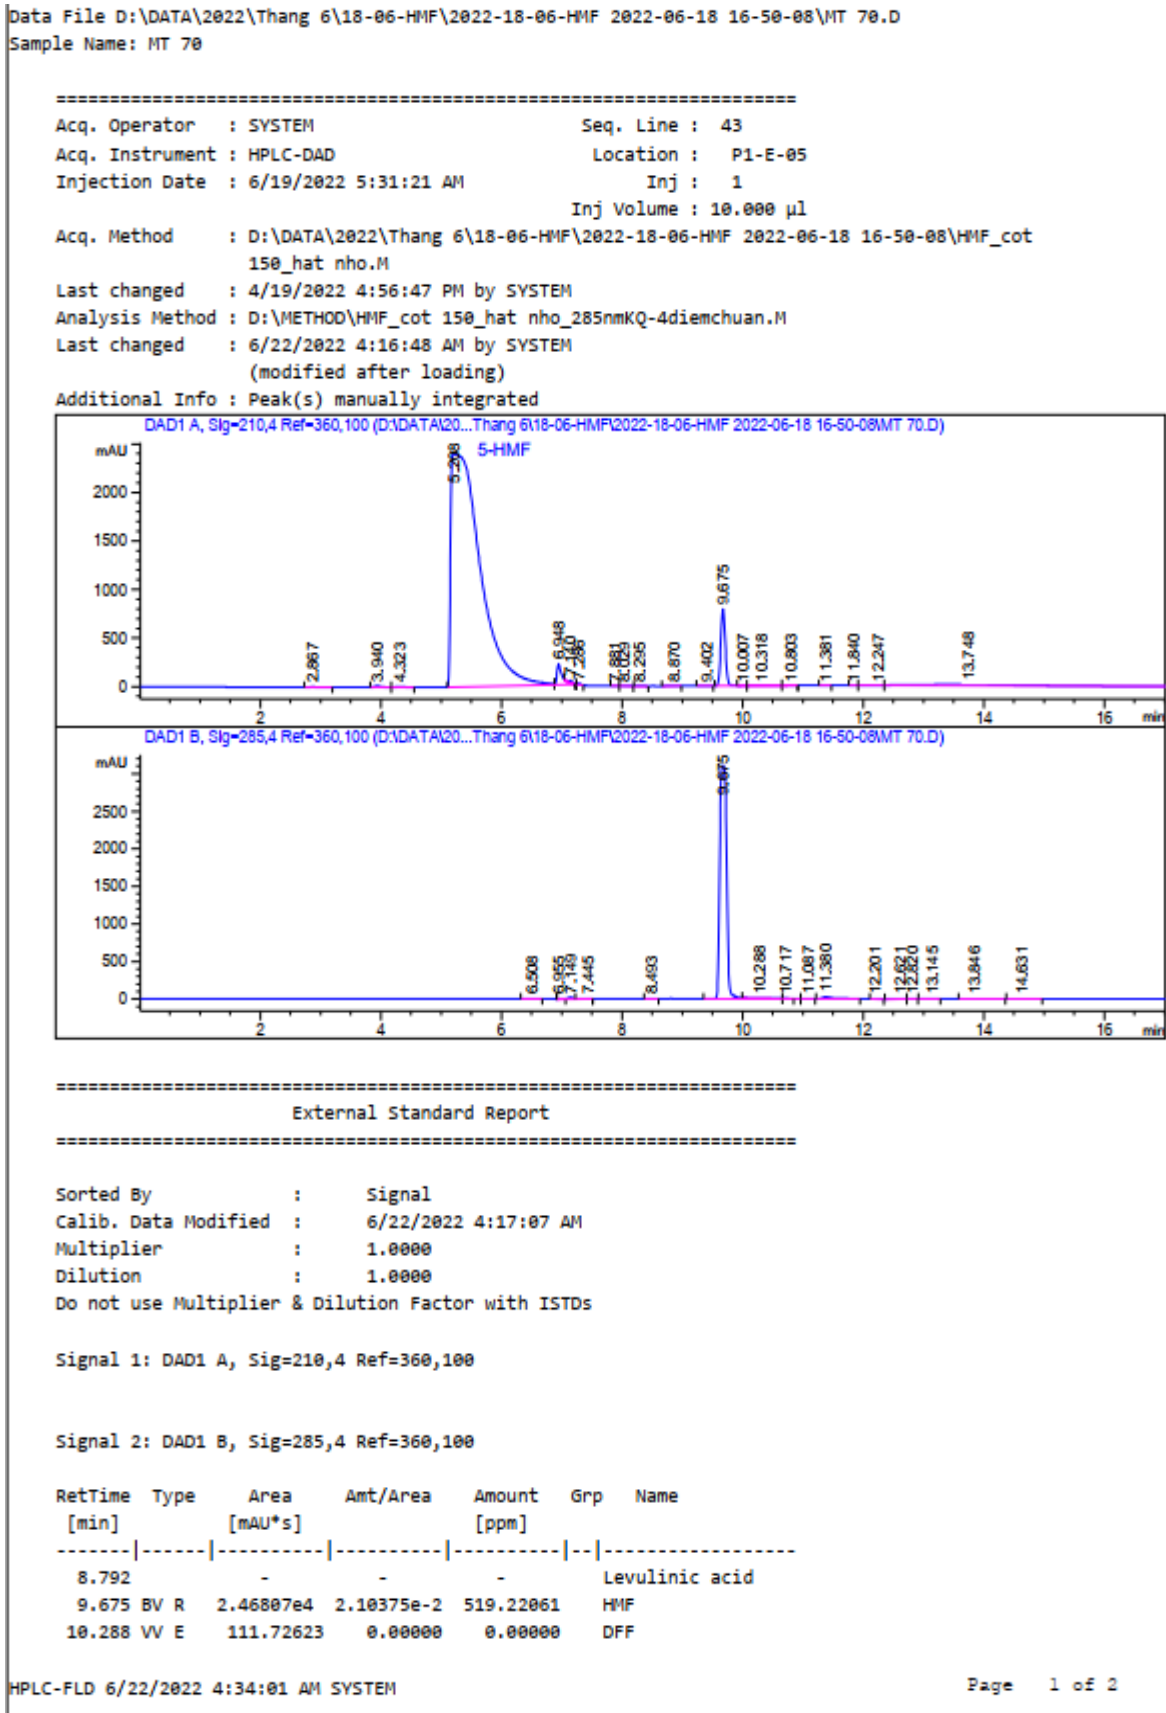

**Figure S4-50:** HPLC chromatography of 5-HMF in investigating catalytic performance. Reaction conditions: Fructose (1mmol), DMSO, for 3 hours at 120 °C.

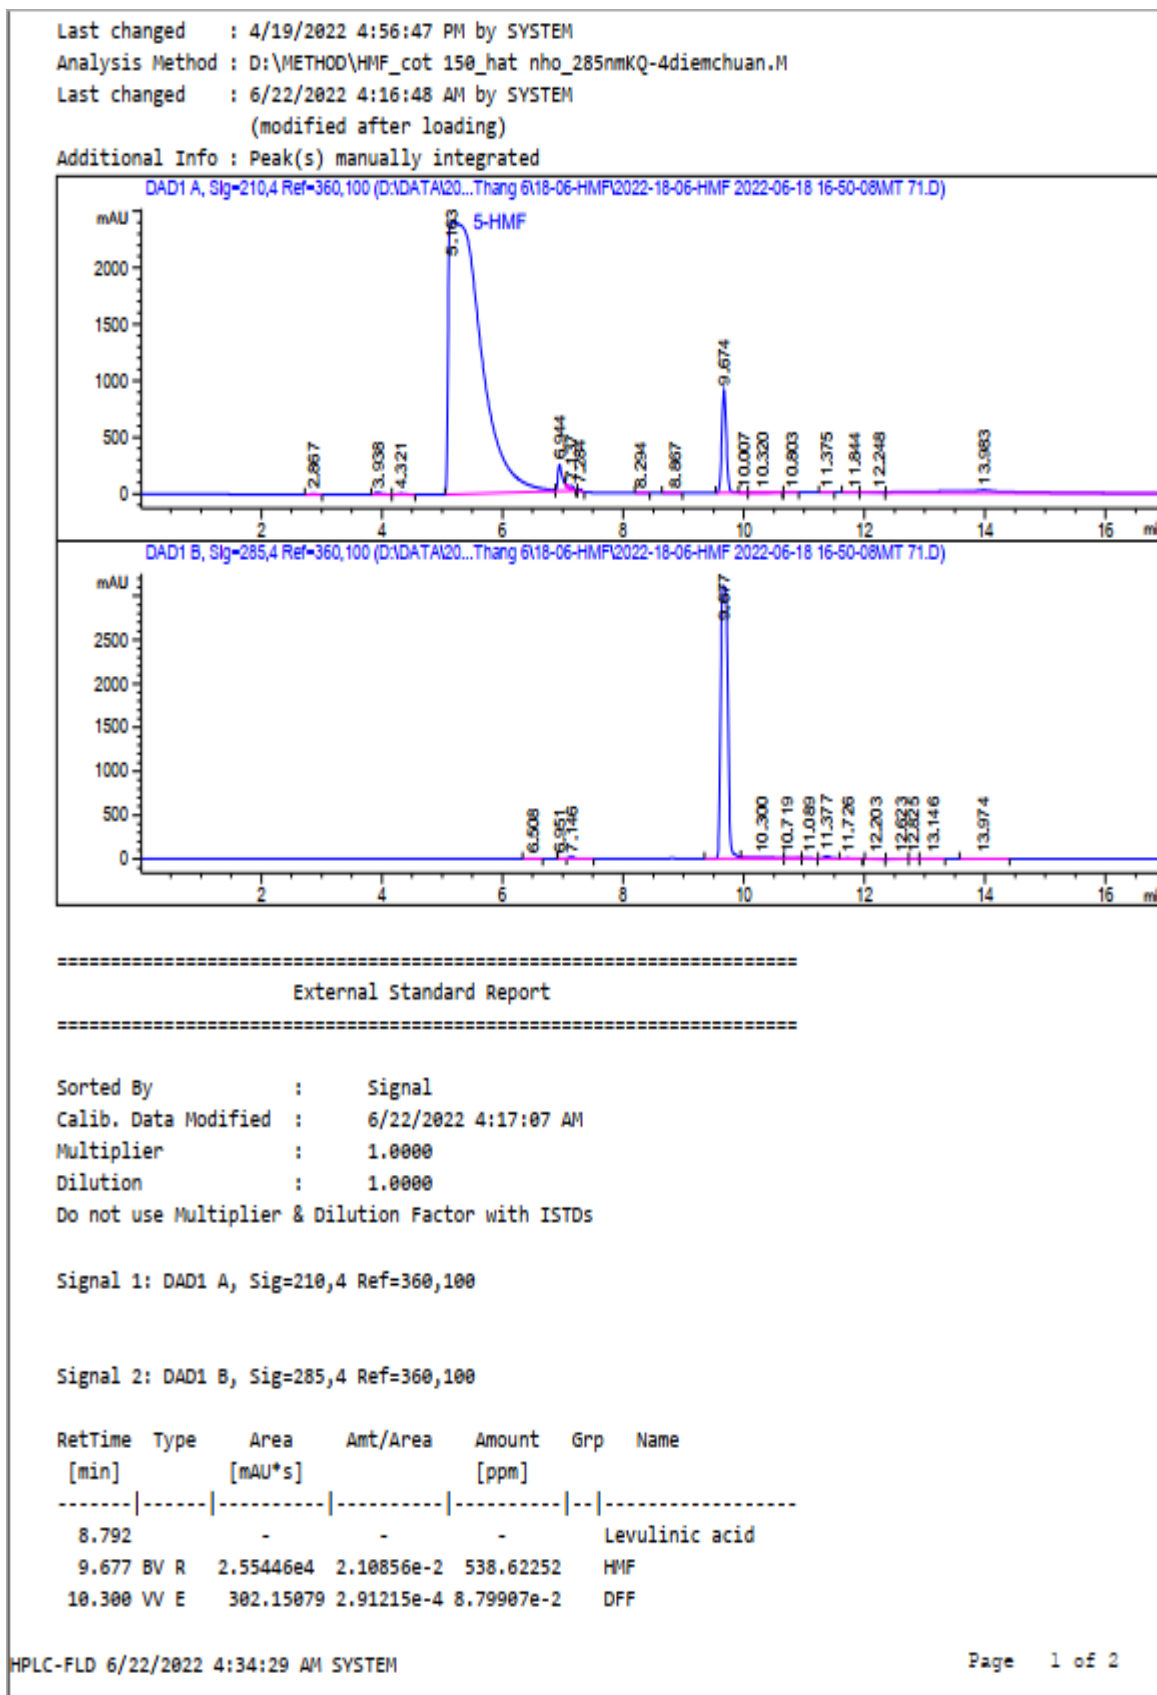

Supplement: d4dt03566f1.pdf [file d4dt03566f1.pdf]
